# Supplementary material for: Climate change is creating a mismatch between protected areas and suitable habitats for frogs and birds in Puerto Rico
Source: Springer Nature journal article supplement (doi:10.1007/s10531-021-02258-9), 2021-07-27

# *Antrostomus noctitherus*

## Puerto Rican nightjar

### Guabairo

### Historical

Historical records  
• Present

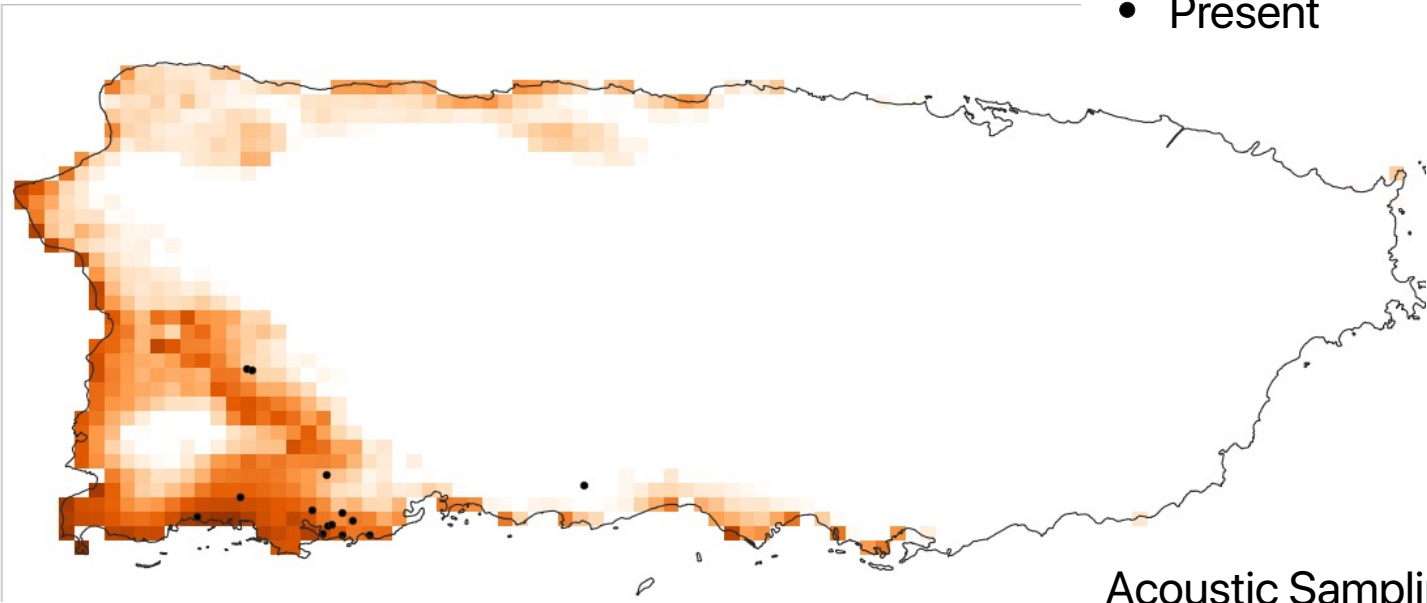

### Current

Acoustic Sampling sites  
○ Absent  
● Present

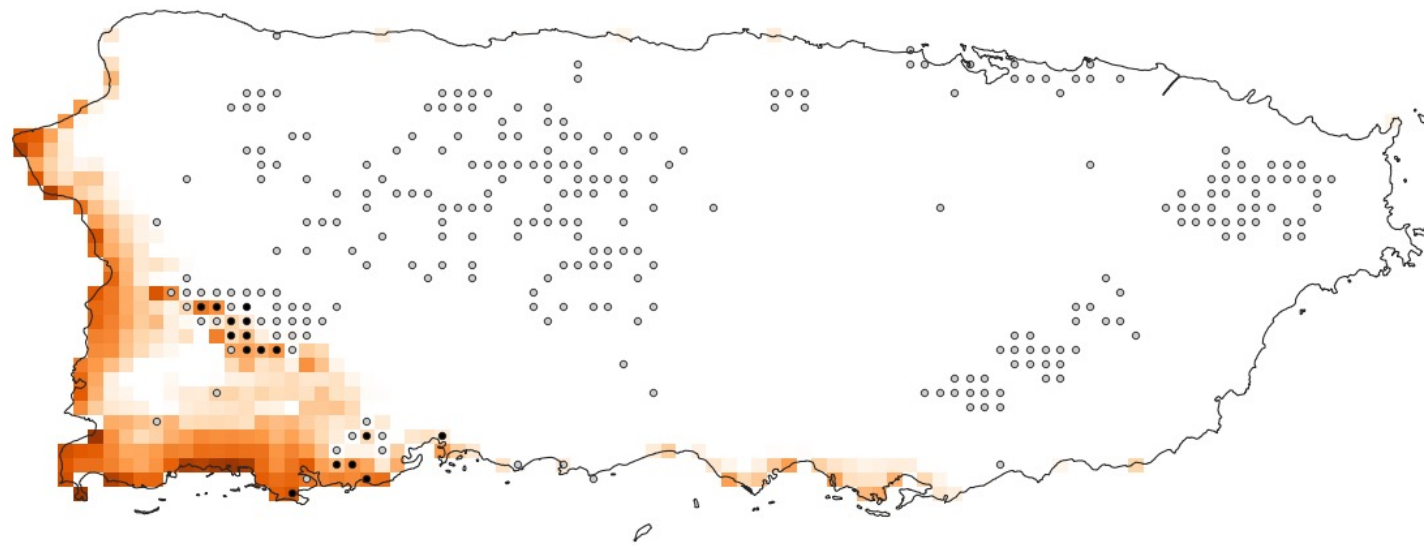

### Future

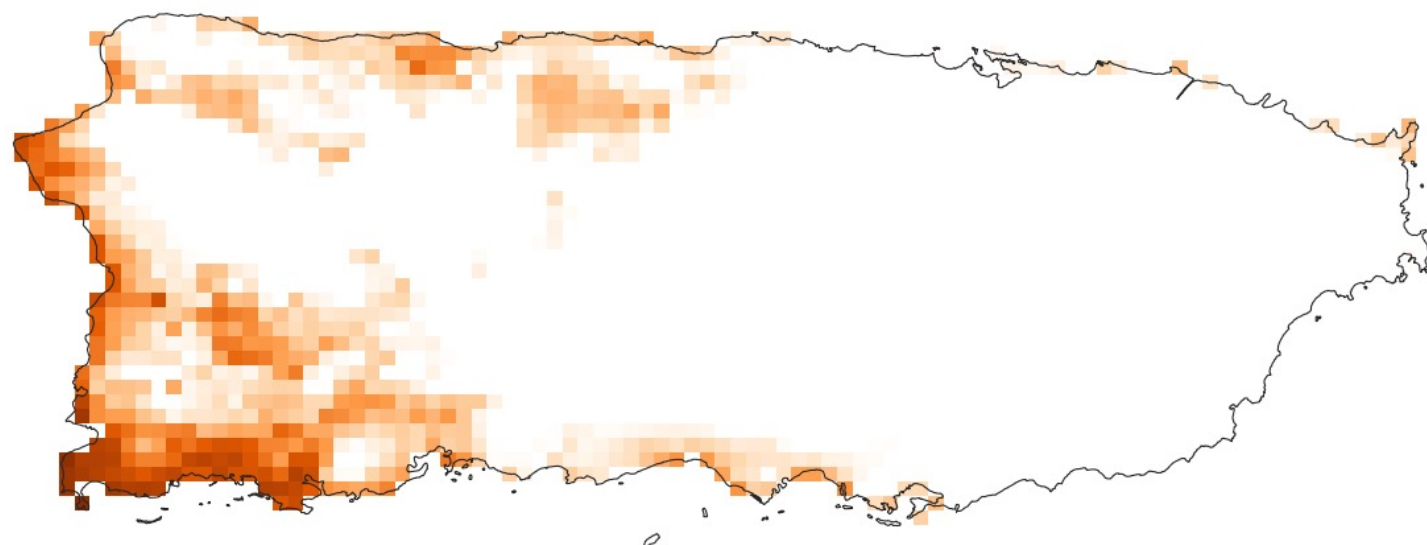

### Habitat suitability

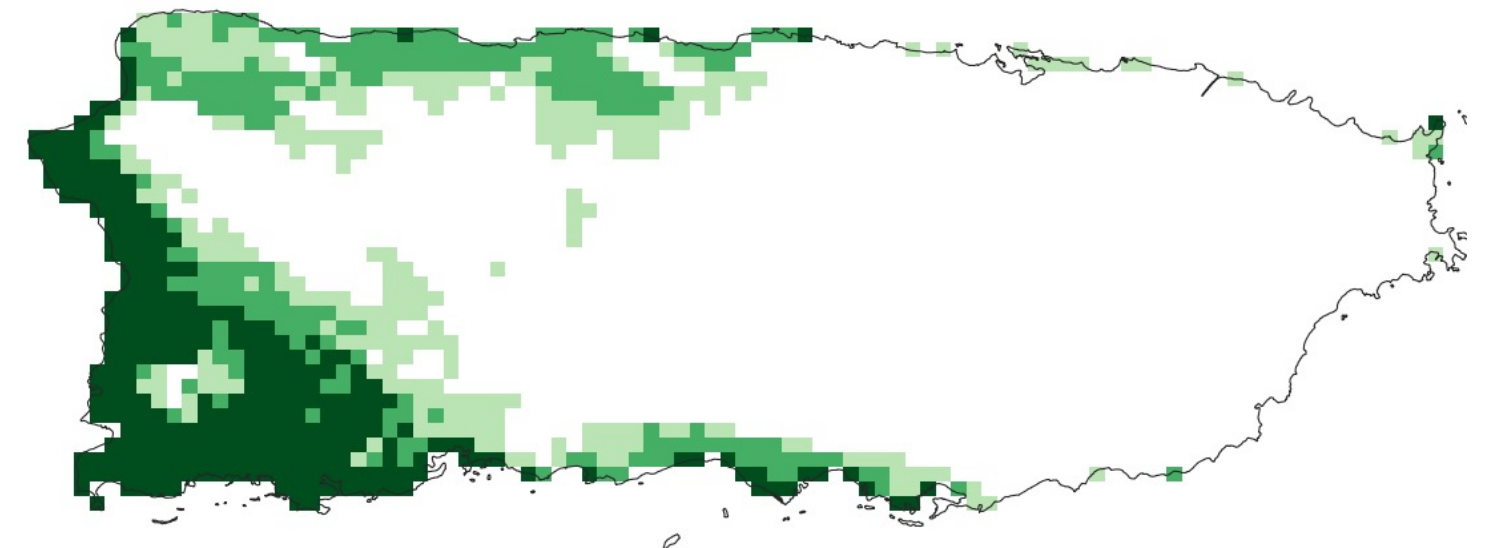

□ Never suitable  
□ Suitable in one era  
□ Suitable in two eras  
□ Always-suitable

Predicted habitat suitability

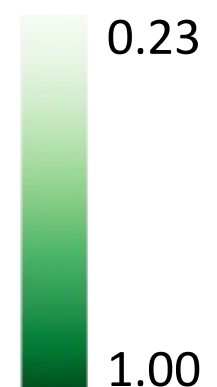

# *Buteo platypterus* Broad-winged Hawk Guaraguao de Bosque

## Historical

Historical records  
• Present

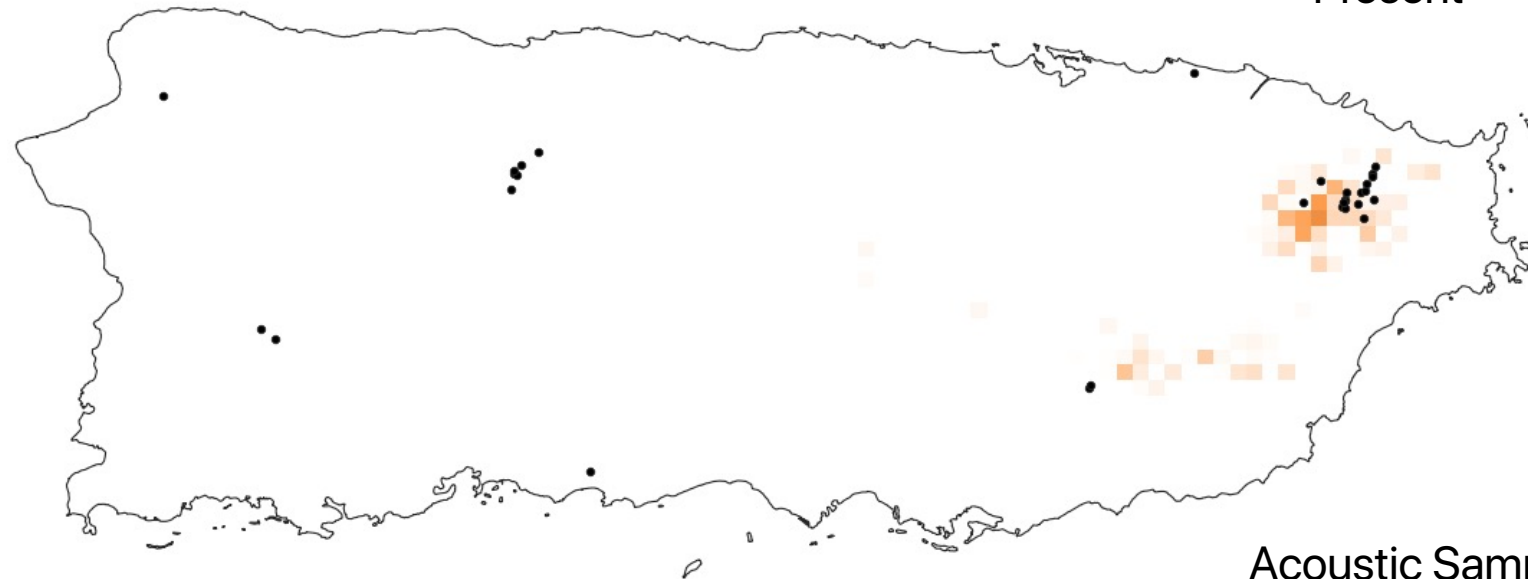

## Current

Acoustic Sampling sites  
○ Absent  
● Present

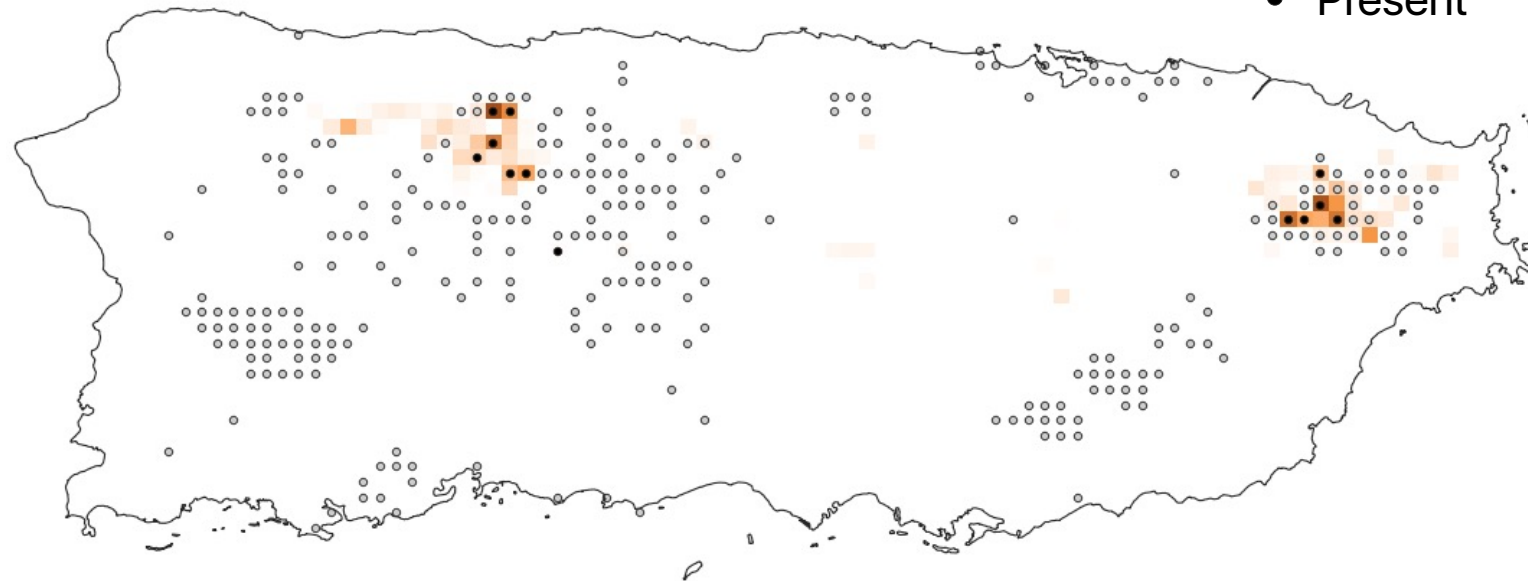

## Future

Predicted habitat suitability

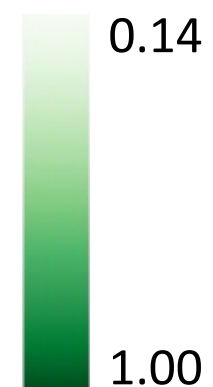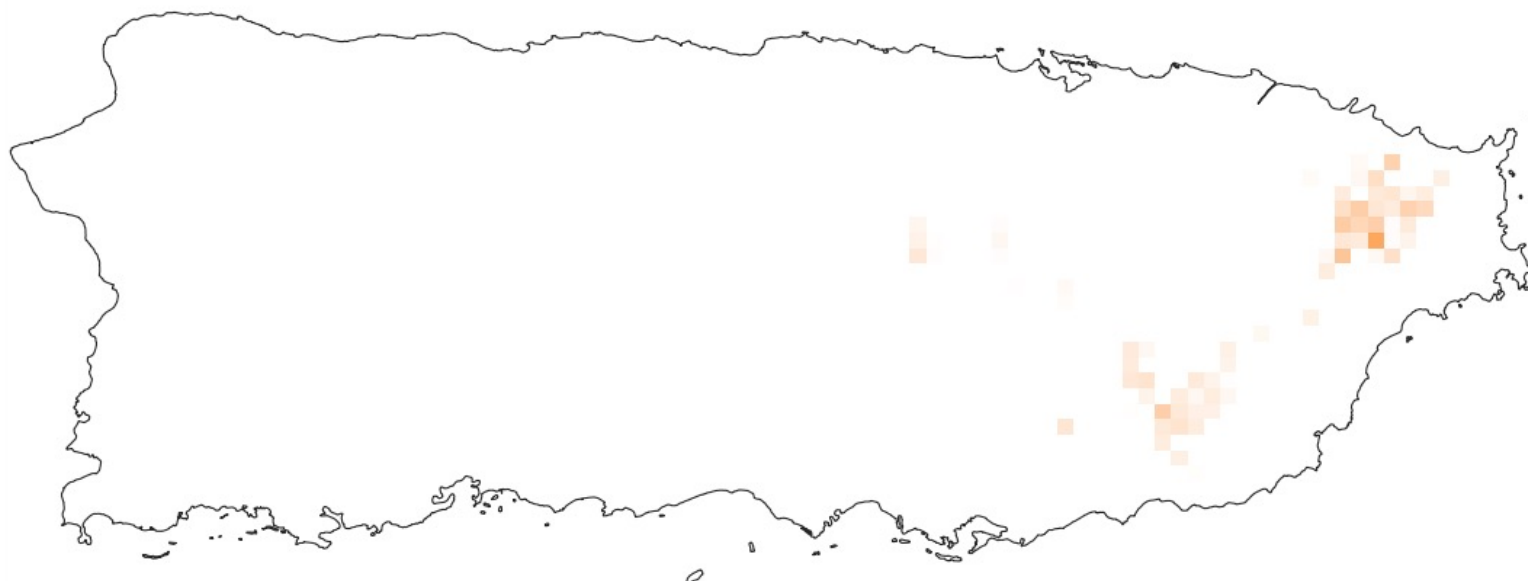

## Habitat suitability

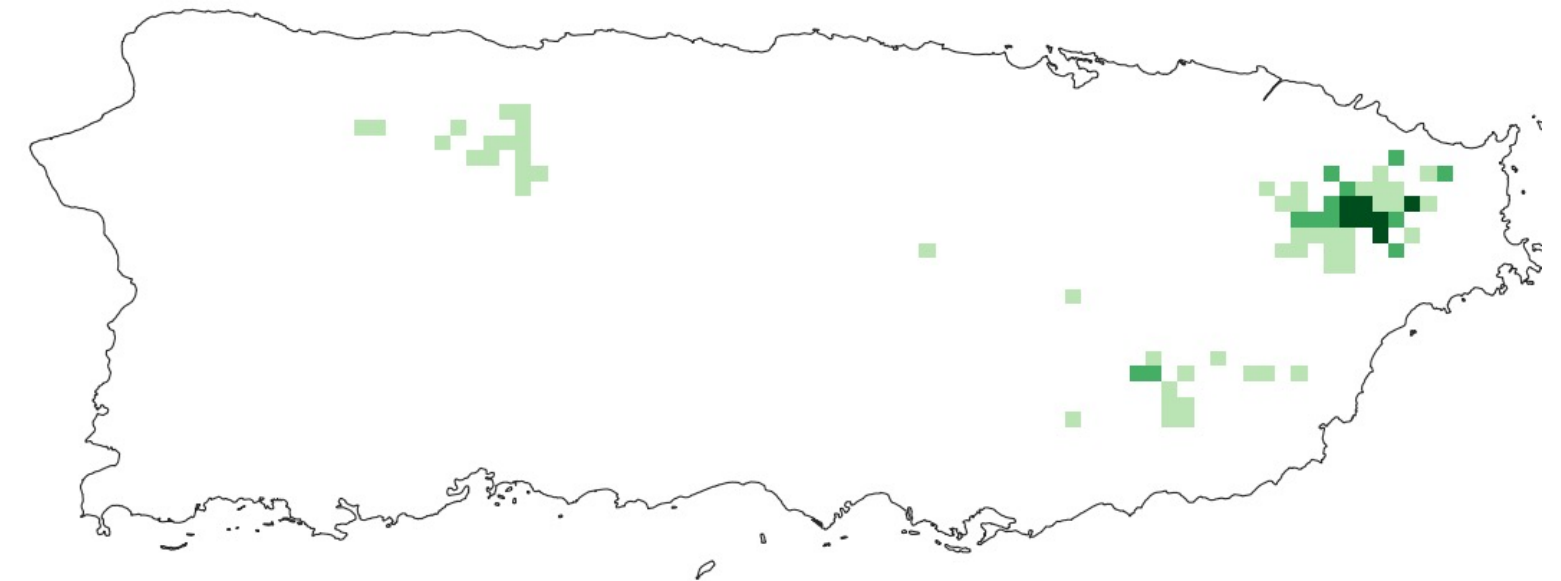

□ Never suitable  
□ Suitable in one era  
□ Suitable in two eras  
□ Always-suitable



# *Coccyzus vieilloti*

## Puerto Rican Lizard-Cuckoo

### Pájaro Bobo Mayor

### Historical

Historical records  
• Present

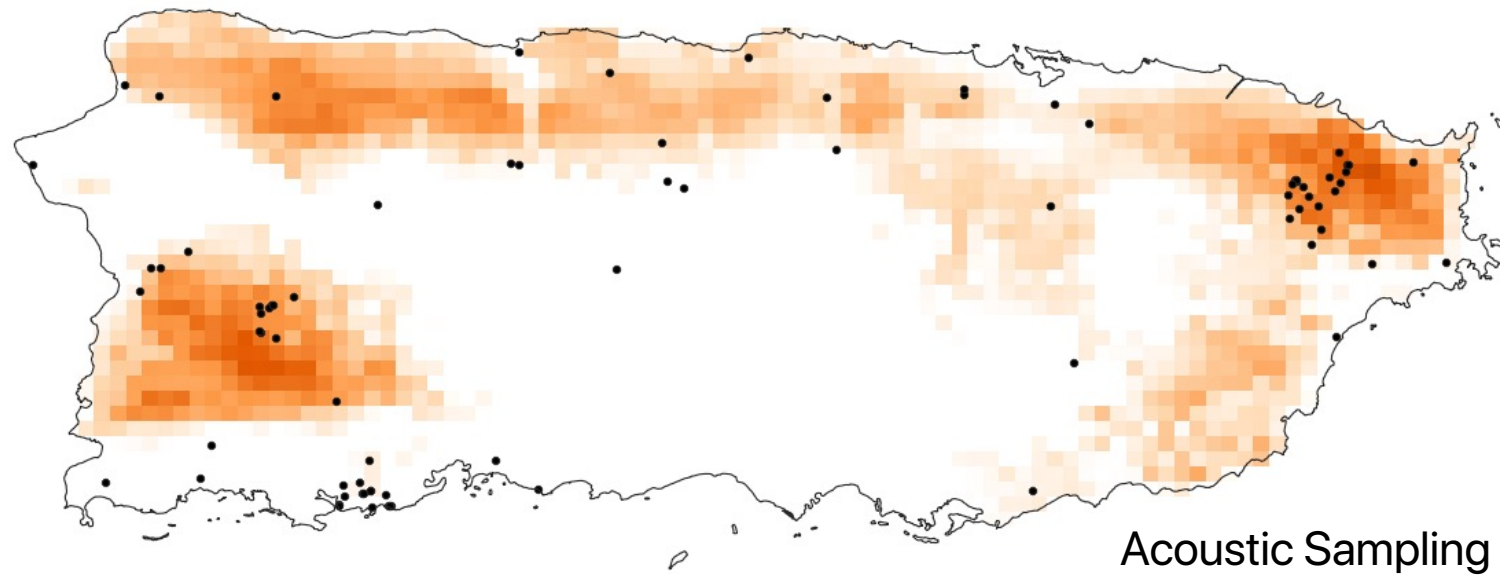

### Current

Acoustic Sampling sites  
○ Absent  
• Present

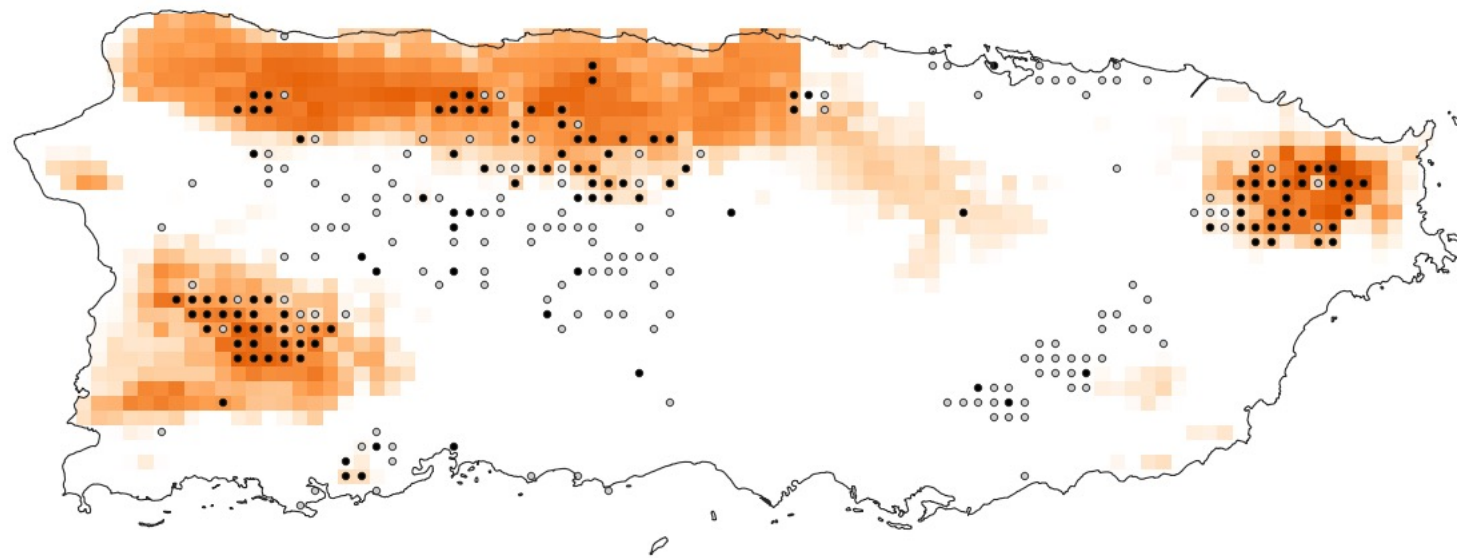

### Future

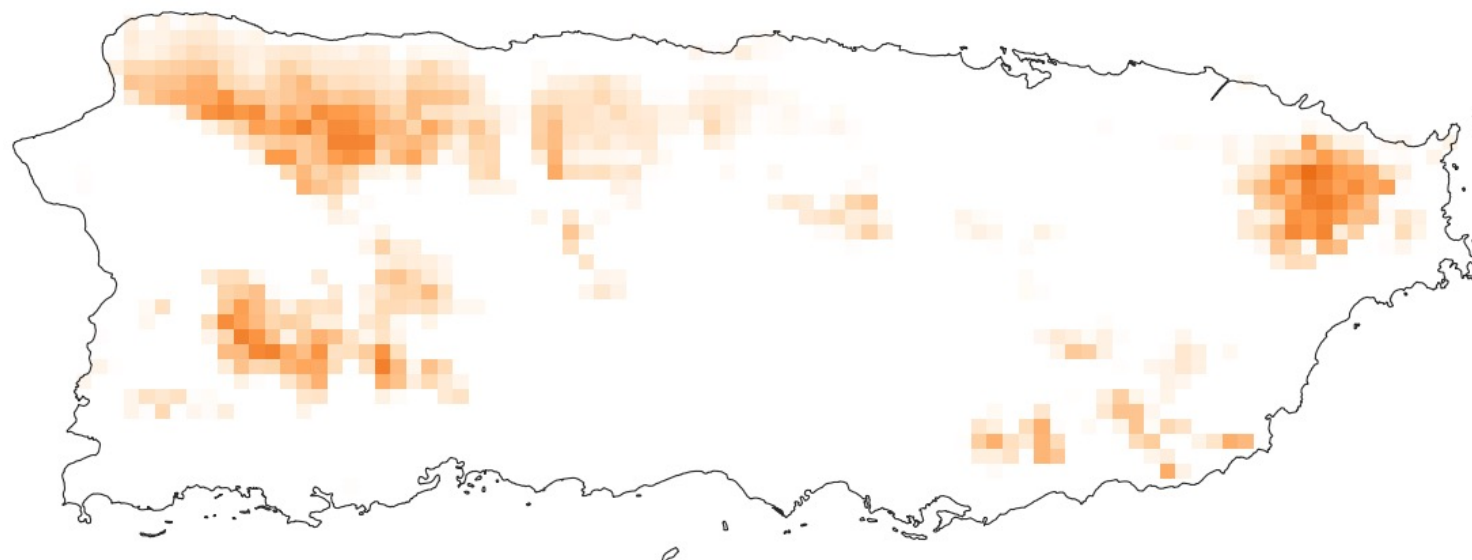

### Habitat suitability

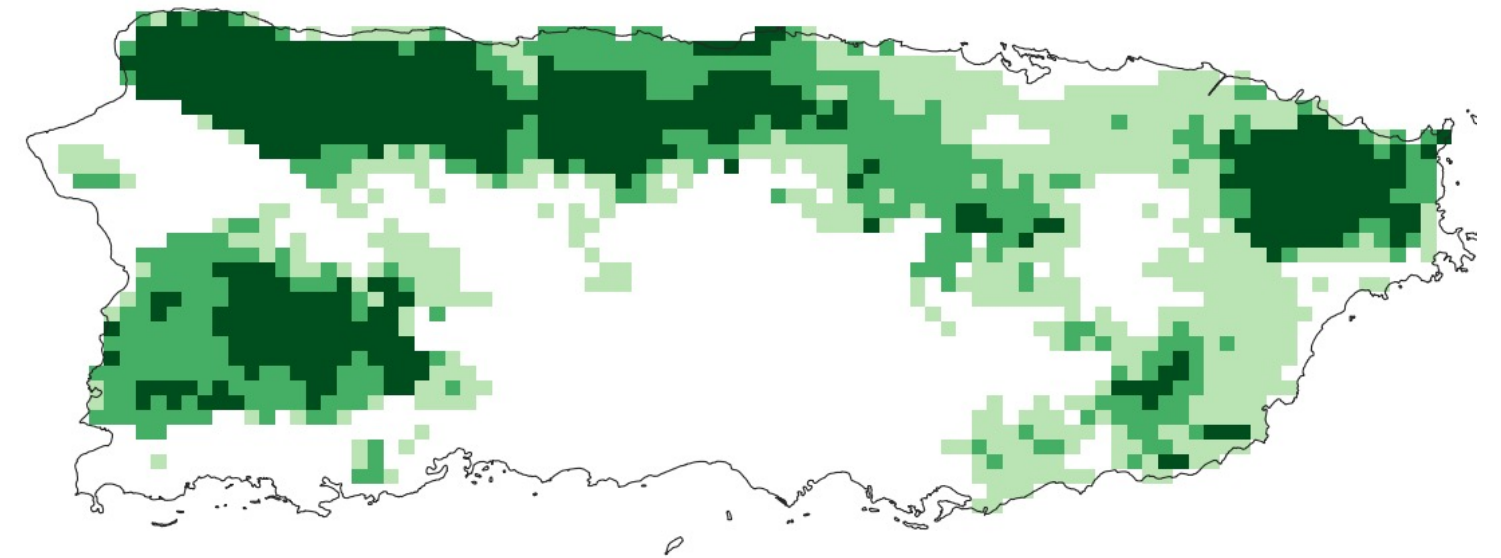

□ Never suitable  
□ Suitable in one era  
□ Suitable in two eras  
■ Always-suitable

Predicted habitat suitability

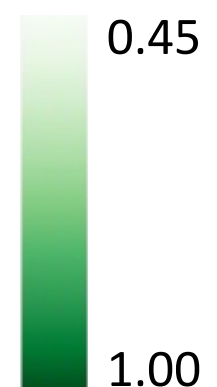

*Geotrygon montana*  
Ruddy Quail-Dove  
Paloma Perdiz Rojiza

Historical

Historical records  
• Present

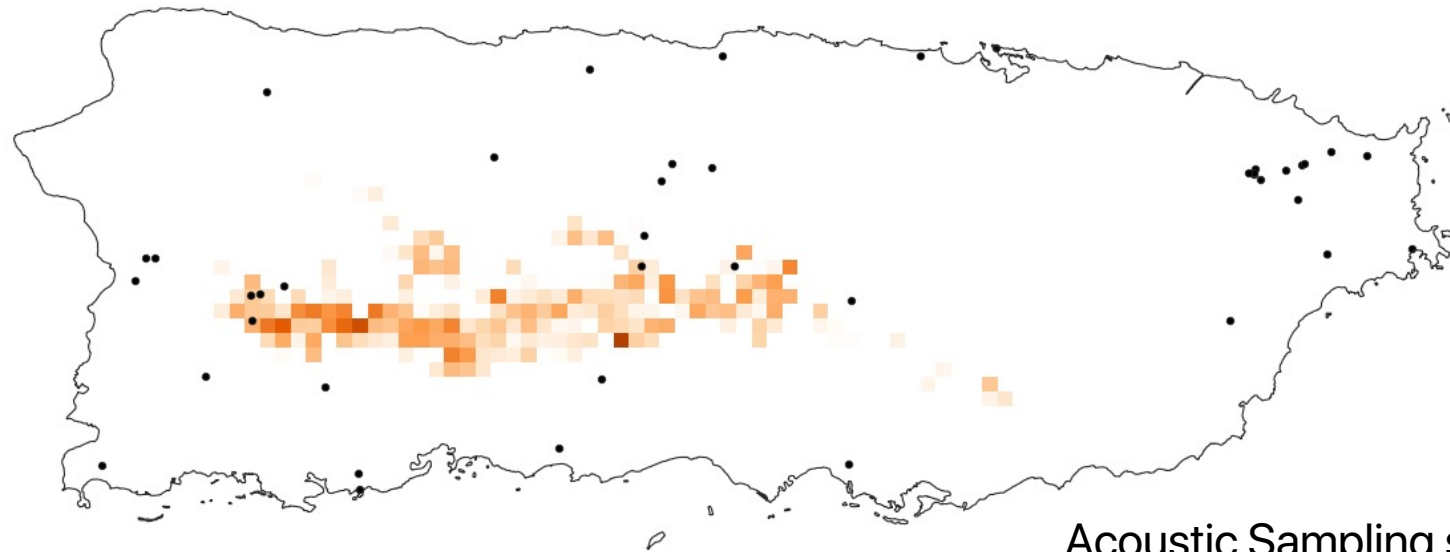

Current

Acoustic Sampling sites  
○ Absent  
• Present

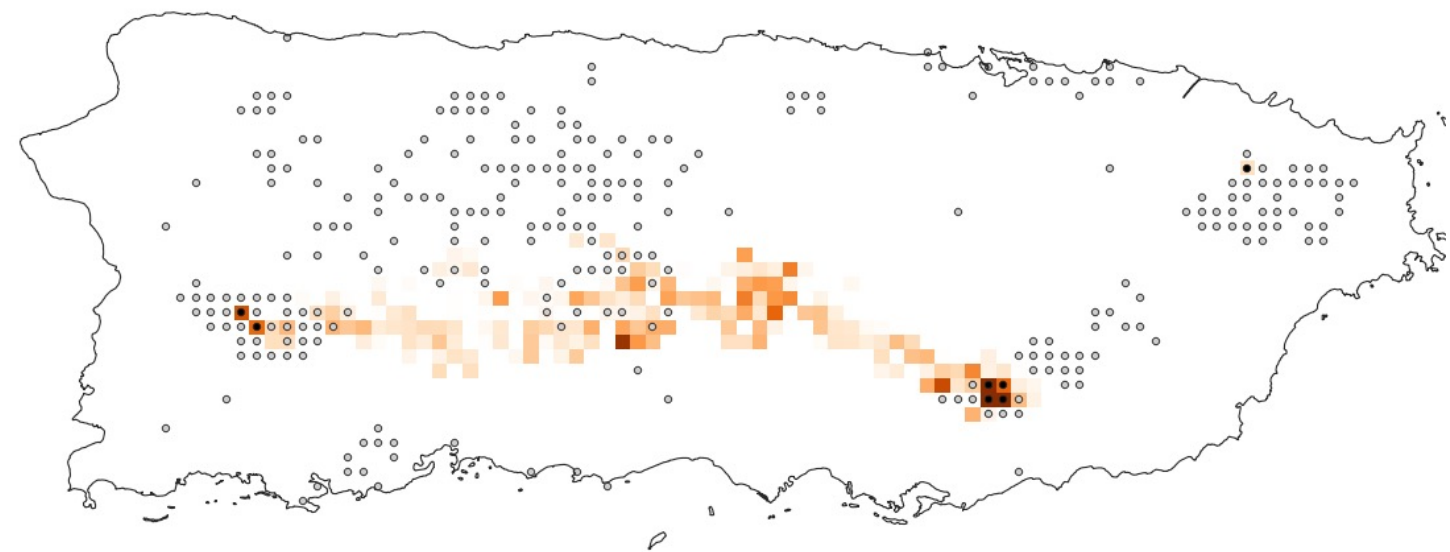

Future

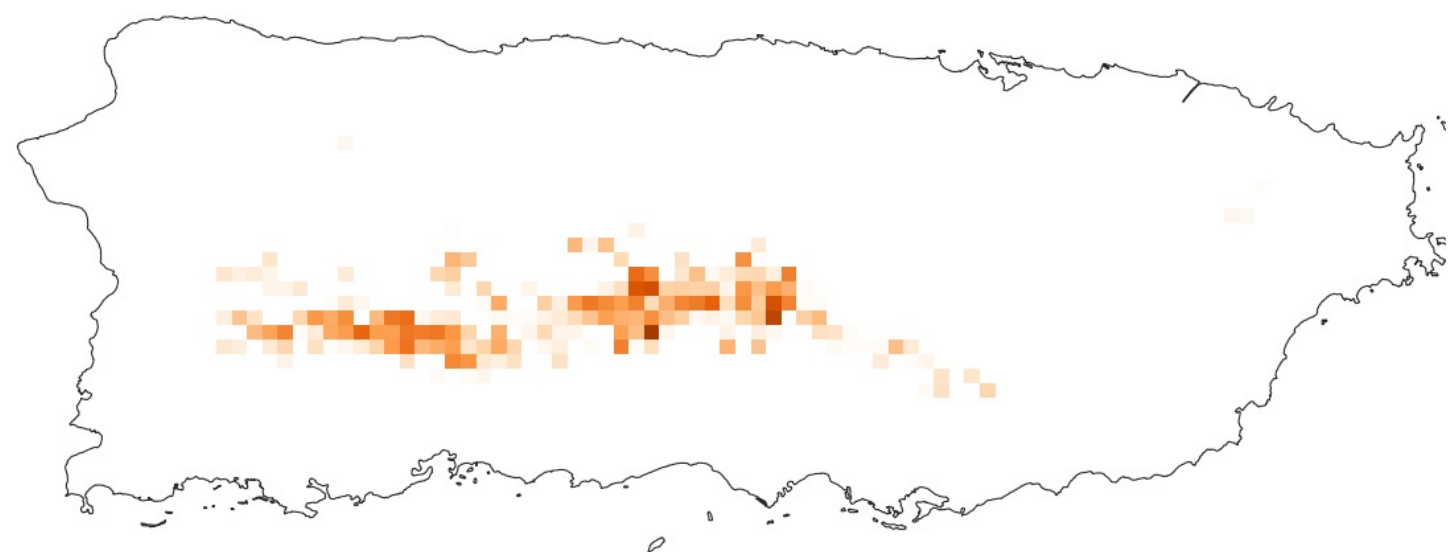

Habitat suitability

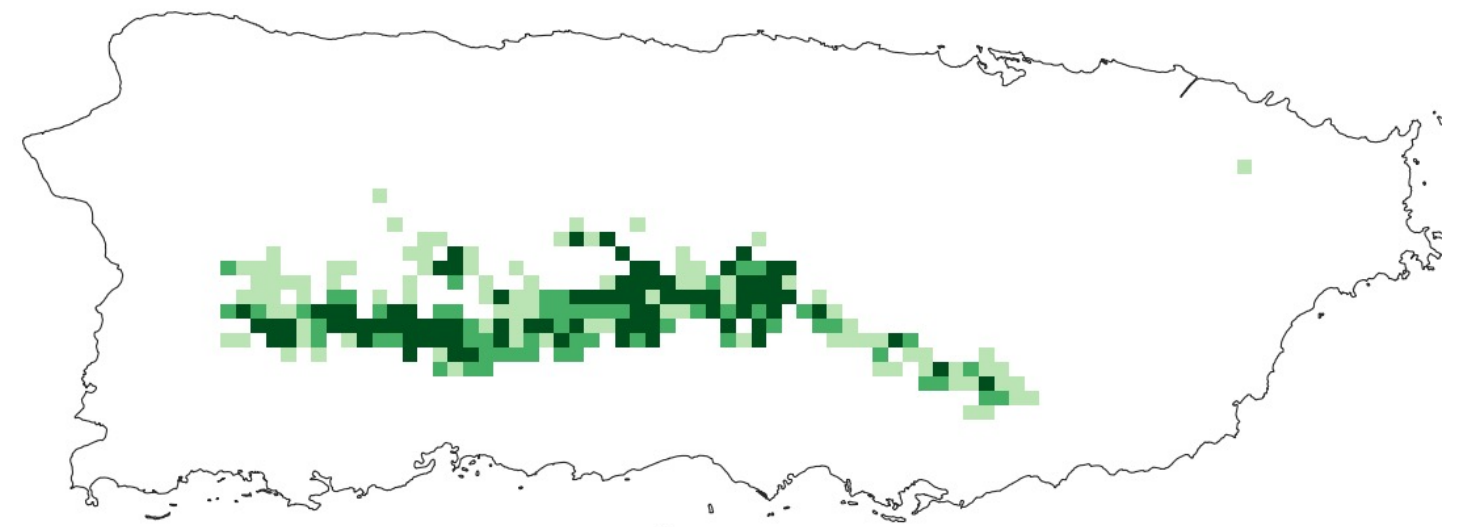

□ Never suitable  
□ Suitable in one era  
□ Suitable in two eras  
□ Always-suitable

Predicted habitat suitability

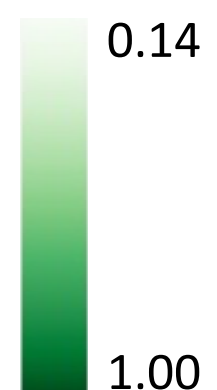



# *Icterus portoricensis* Puerto Rican Oriole Calandria

## Historical

Historical records  
• Present

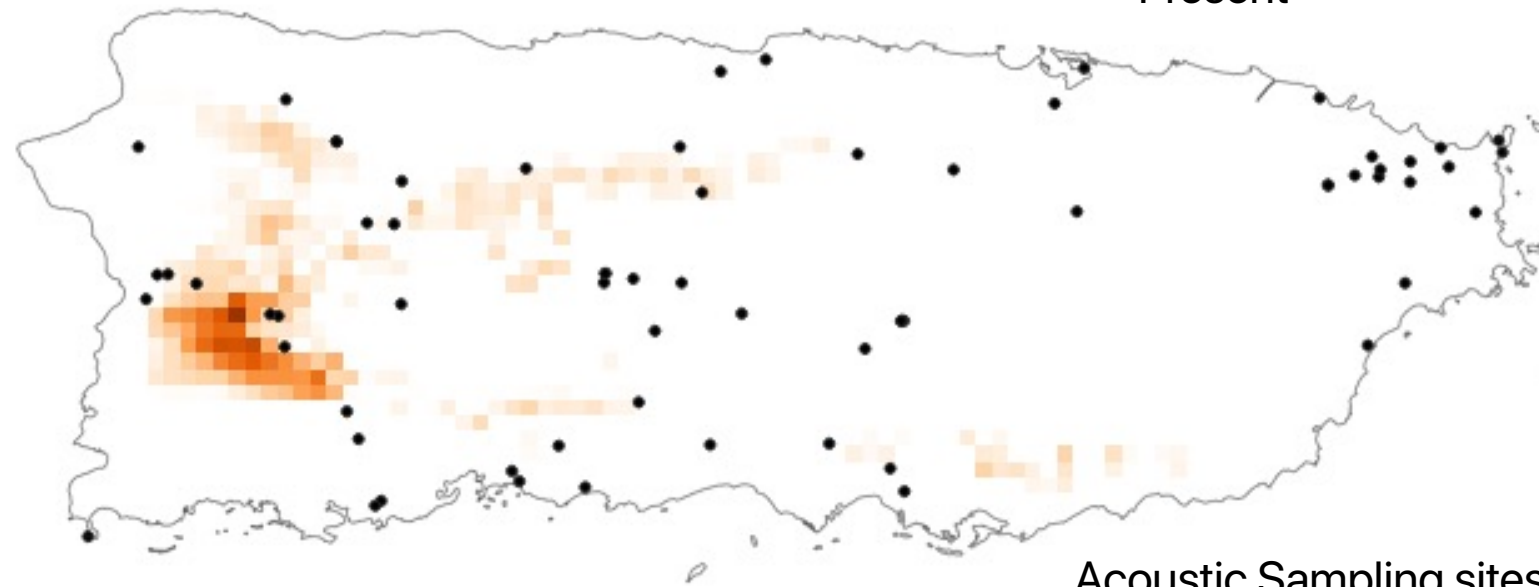

## Current

Acoustic Sampling sites  
○ Absent  
• Present

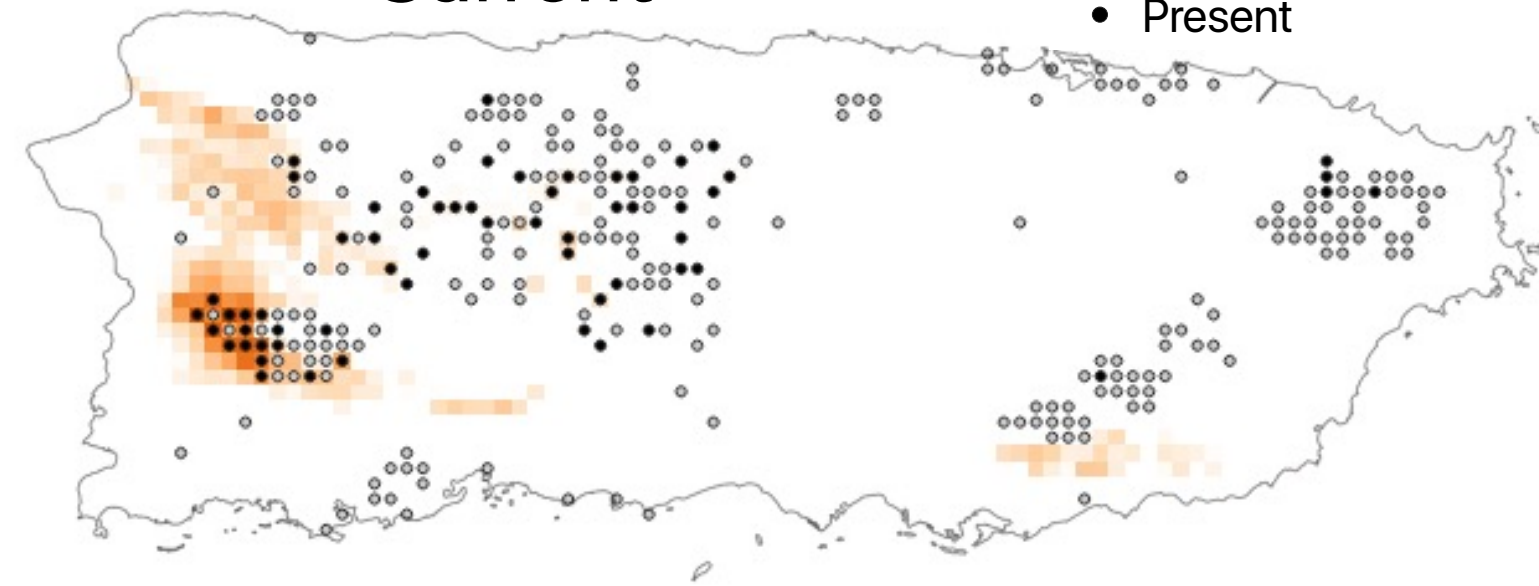

## Future

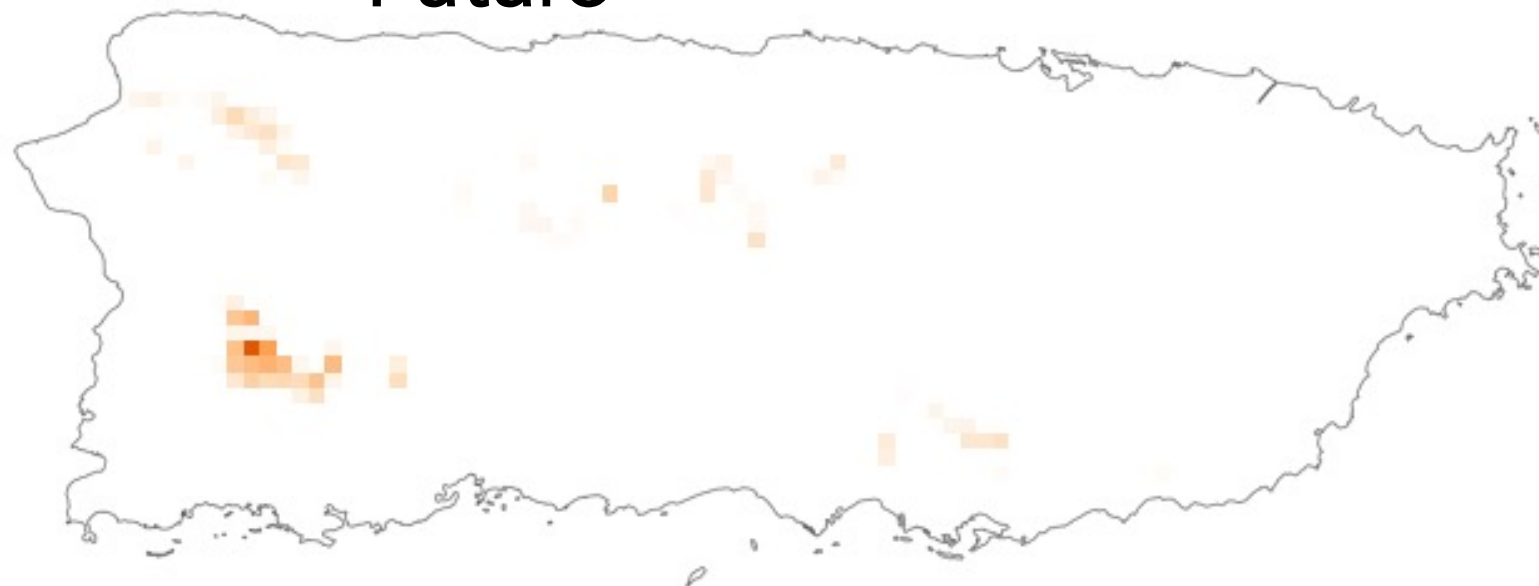

## Habitat suitability

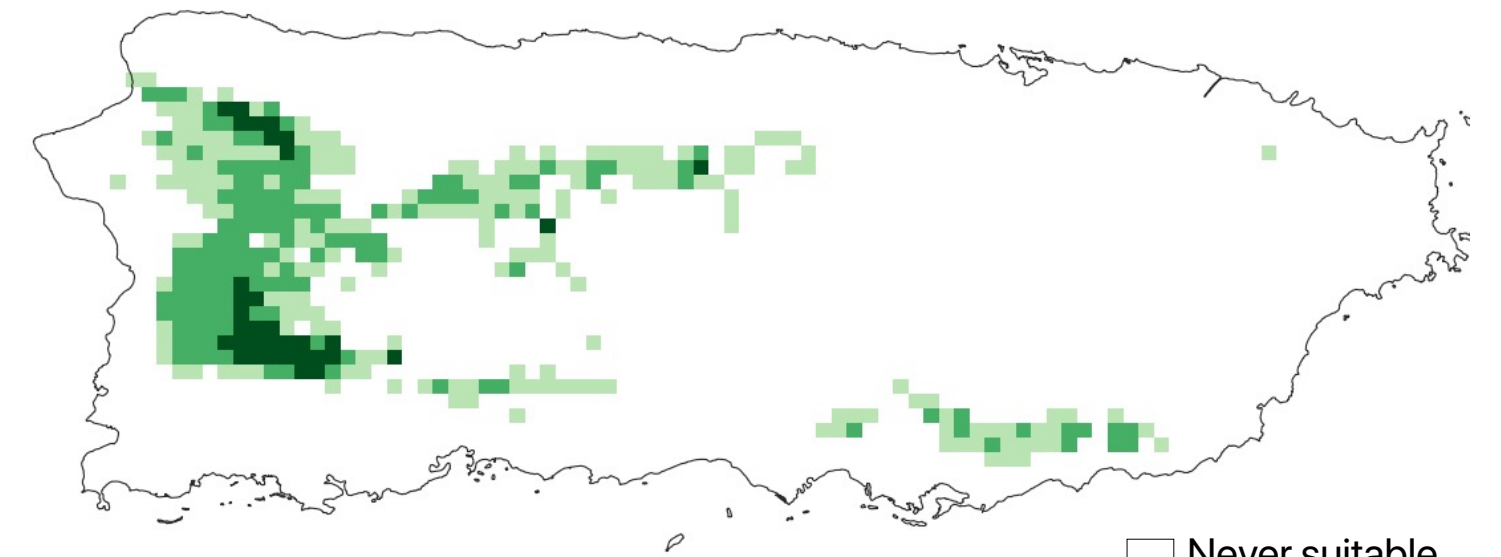

□ Never suitable  
■ Suitable in one era  
■ Suitable in two eras  
■ Always-suitable

Predicted habitat suitability

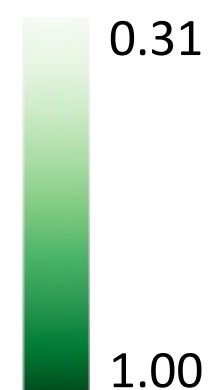

# *Loxigilla portoricensis* Puerto Rican Bullfinch Comeñame

## Historical

Historical records  
• Present

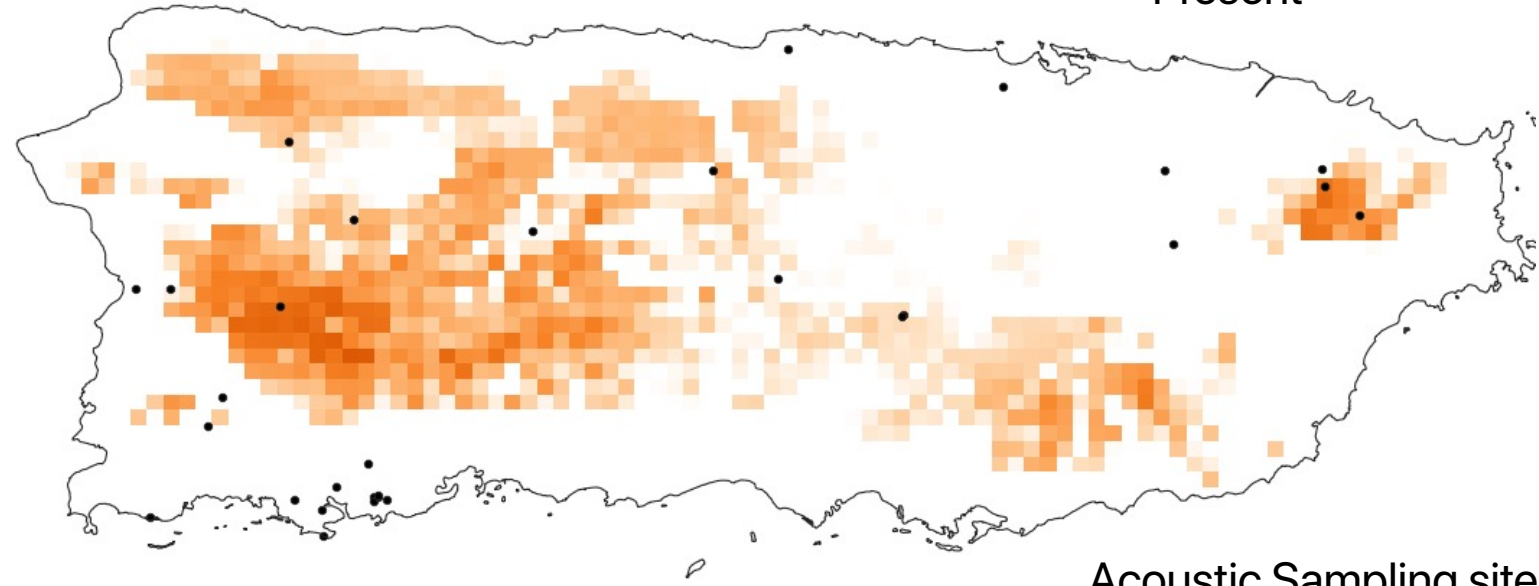

## Current

Acoustic Sampling sites  
○ Absent  
• Present

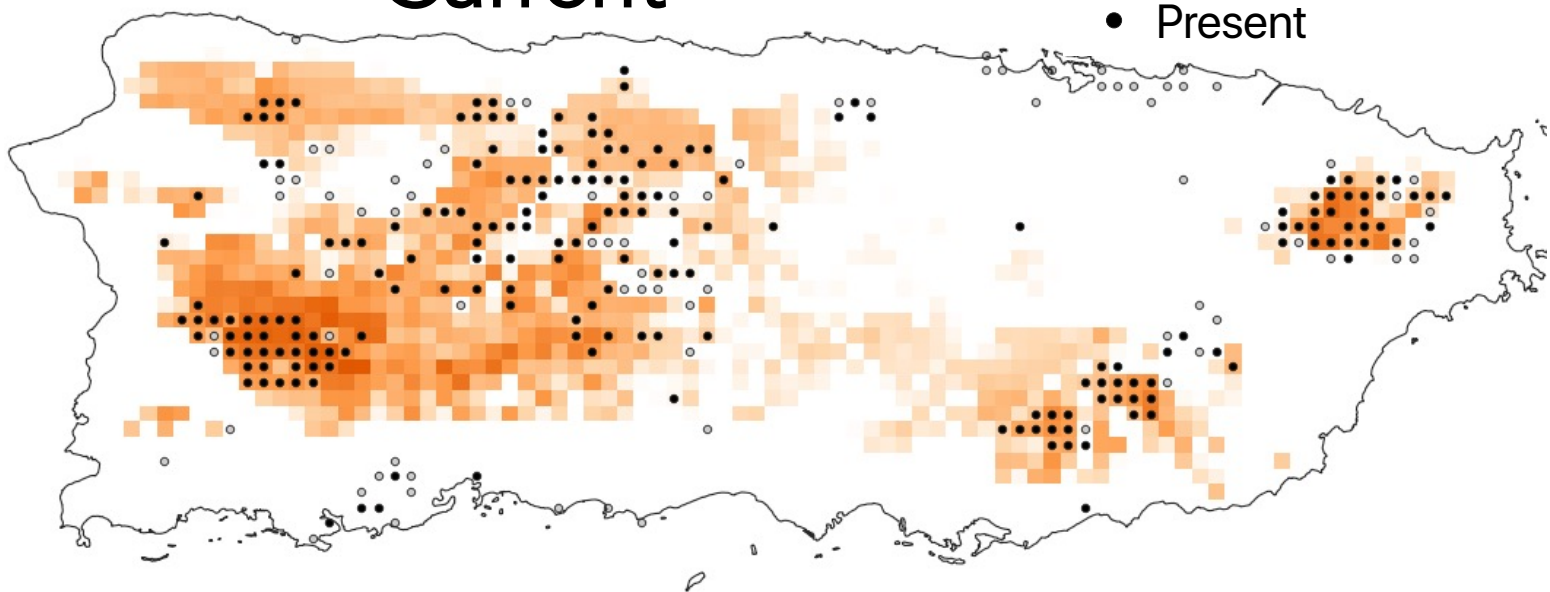

## Future

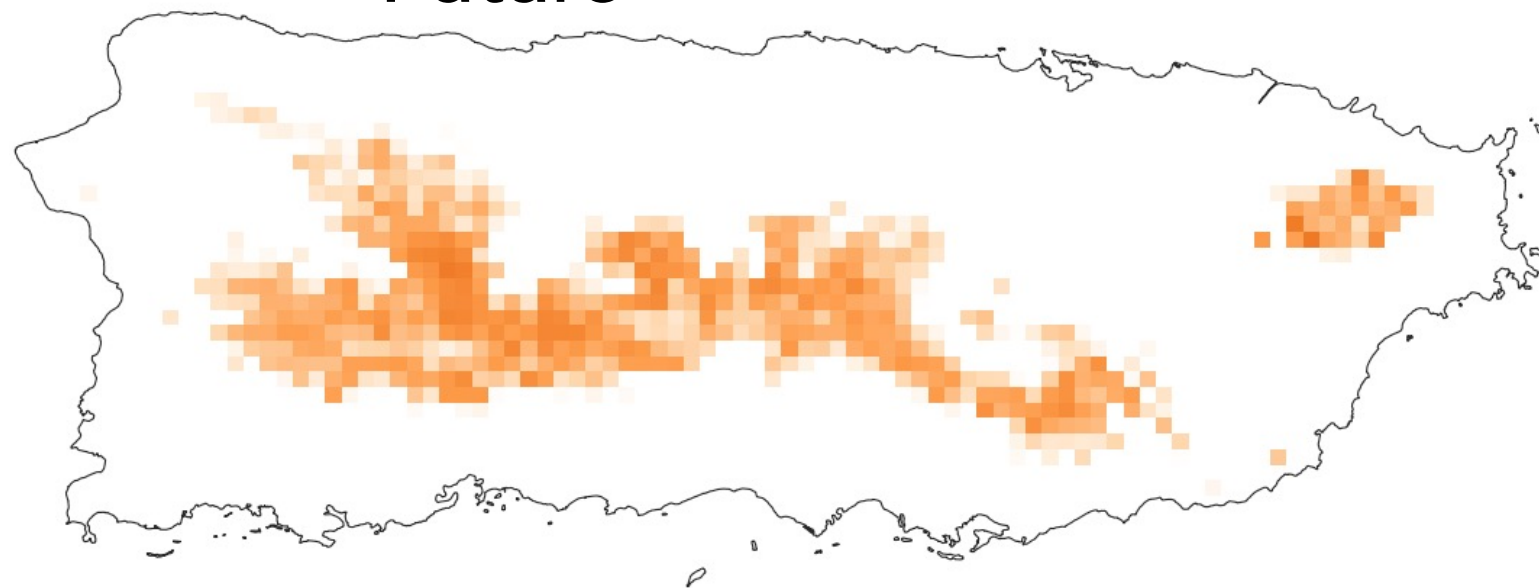

## Habitat suitability

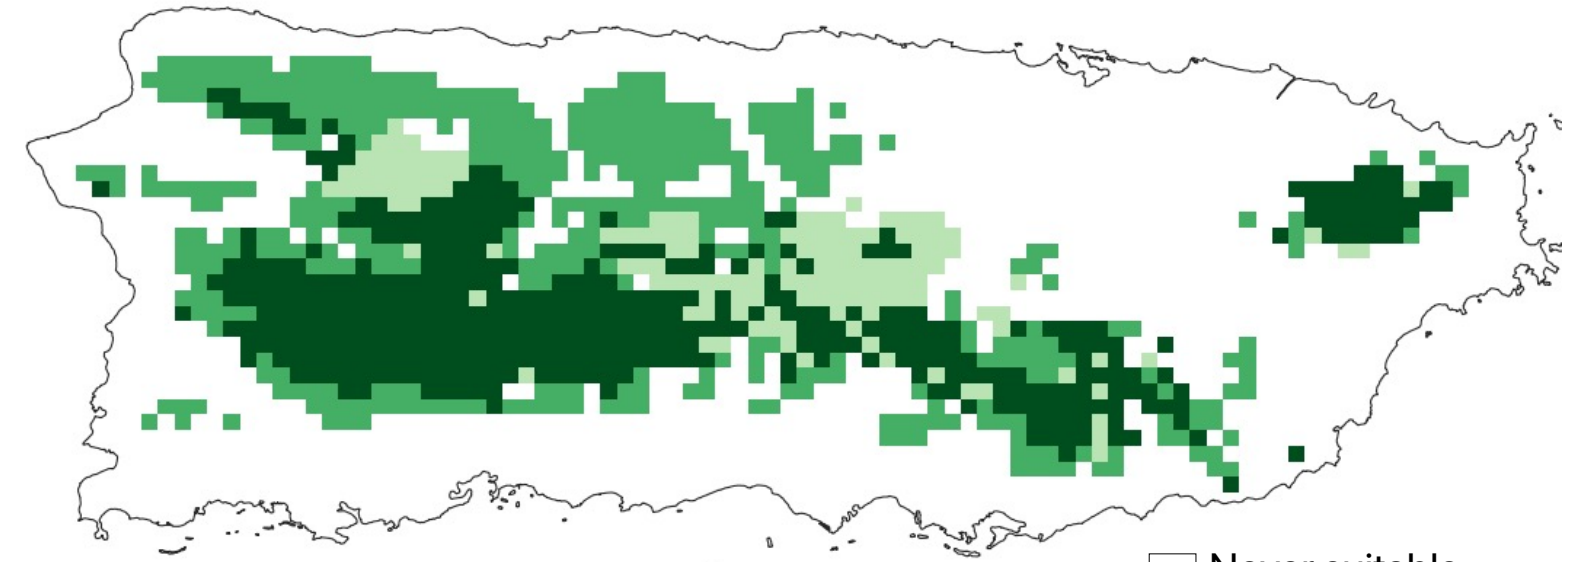

□ Never suitable  
□ Suitable in one era  
□ Suitable in two eras  
□ Always-suitable

Predicted habitat suitability

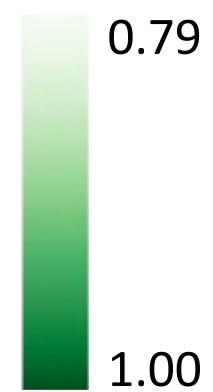



# *Melanerpes portoricensis* Puerto Rican Woodpecker Carpintero

## Historical

Historical records  
• Present

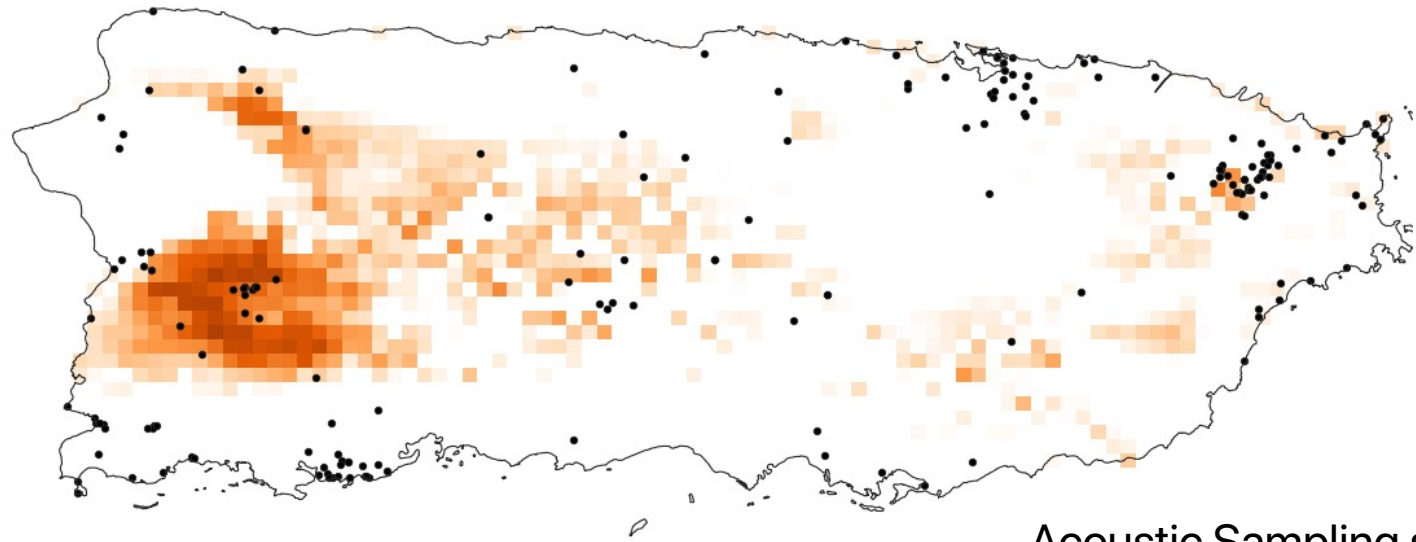

## Current

Acoustic Sampling sites  
○ Absent  
• Present

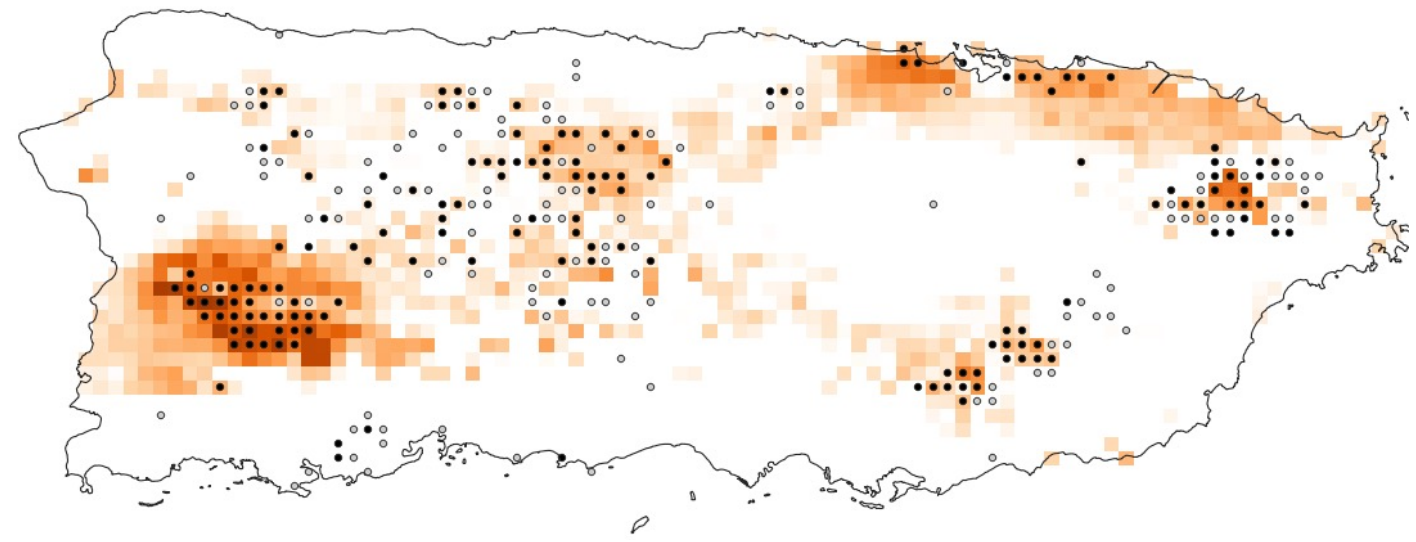

## Future

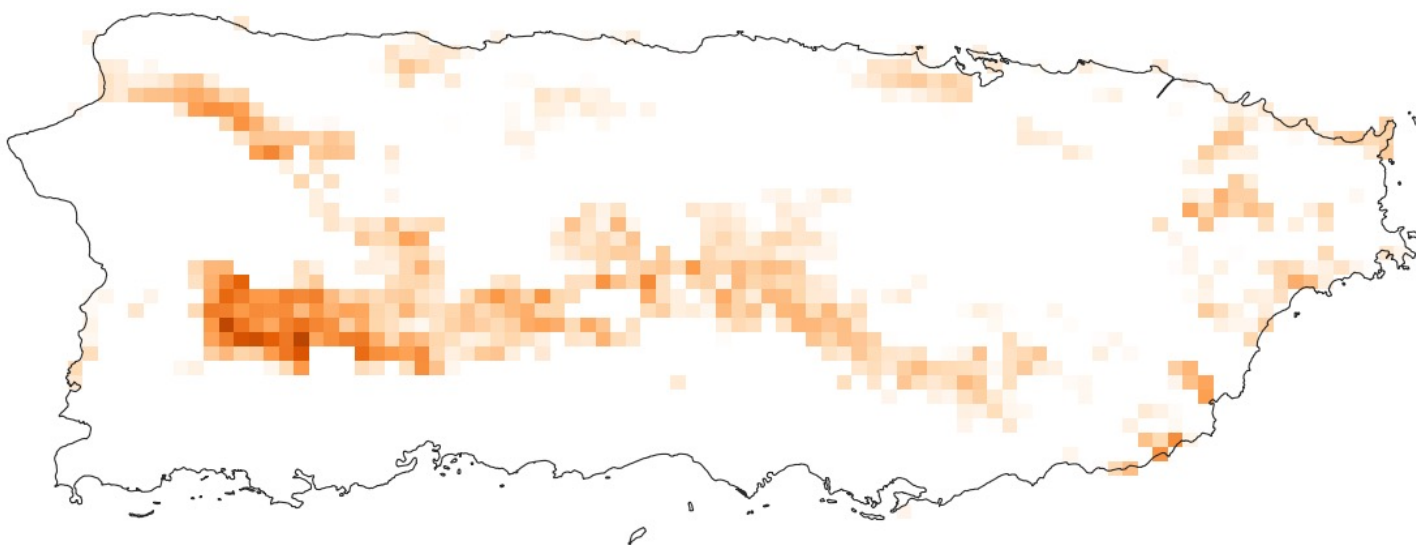

## Habitat suitability

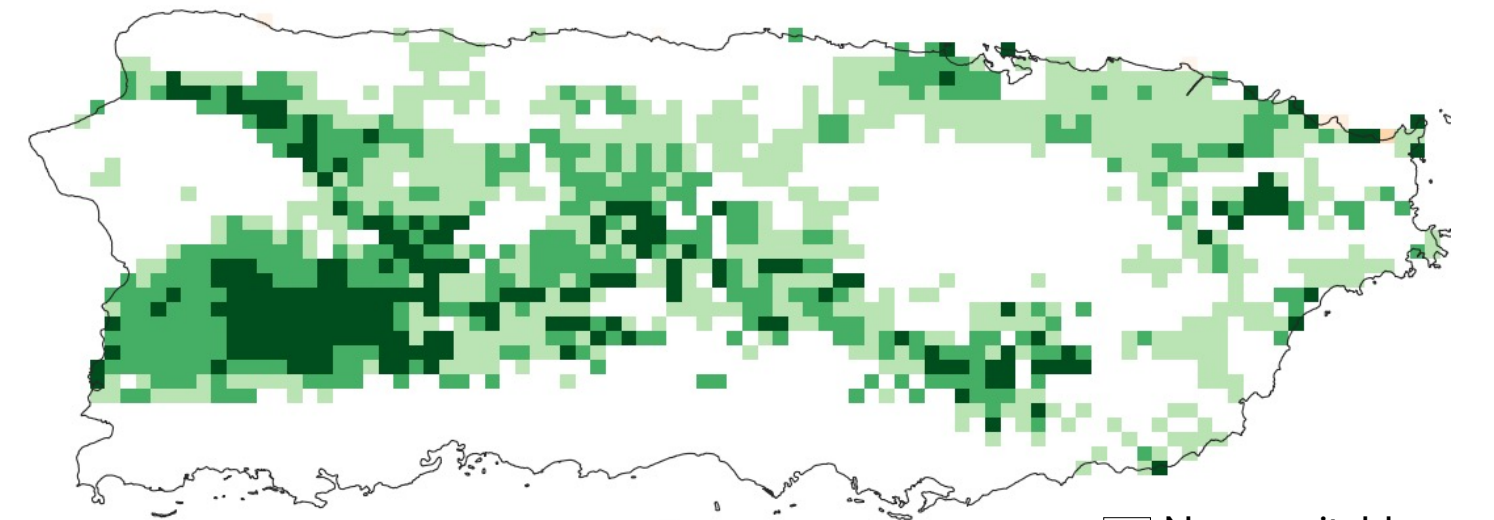

□ Never suitable  
□ Suitable in one era  
□ Suitable in two eras  
■ Always-suitable

Predicted habitat suitability

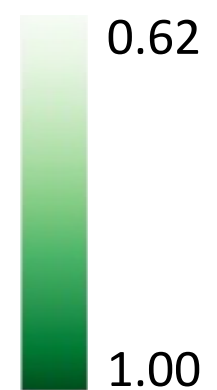

# *Nesospingus speculariferus*

## Puerto Rican Tanager

### Llorosa

### Historical

Historical records  
• Present

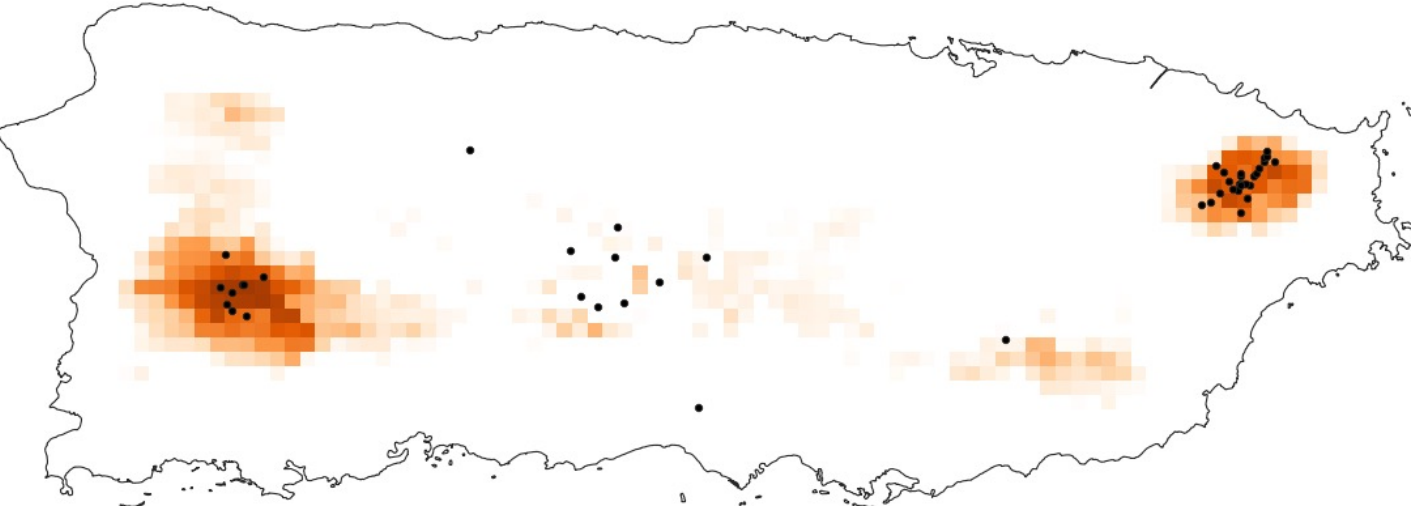

### Current

Acoustic Sampling sites  
○ Absent  
• Present

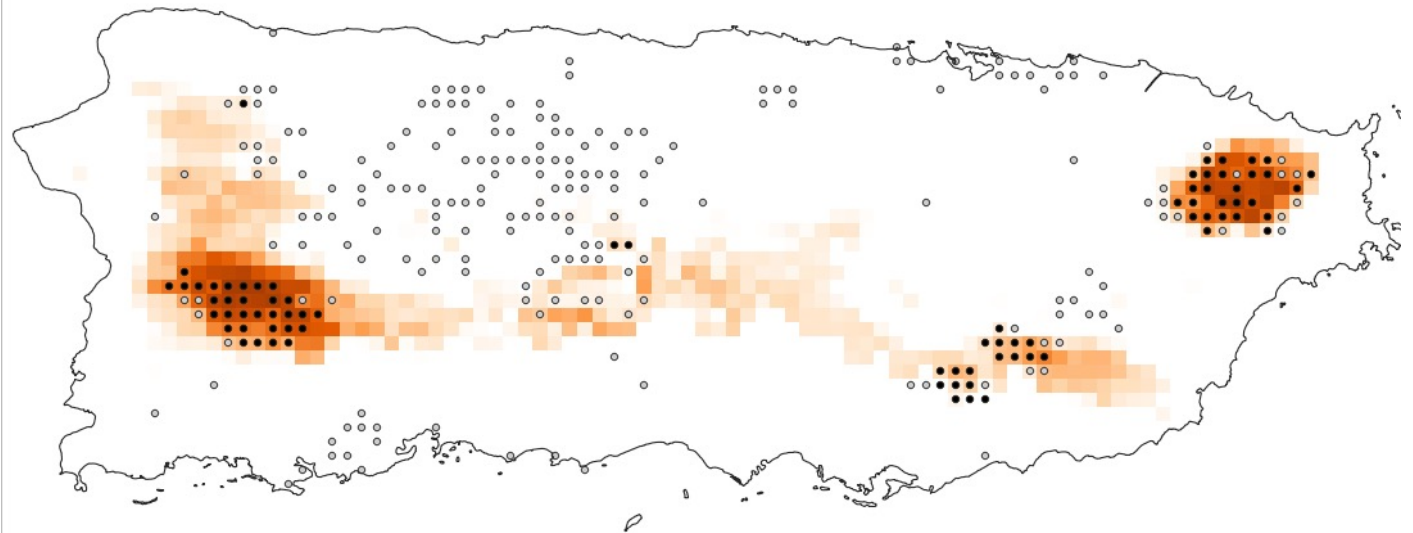

### Future

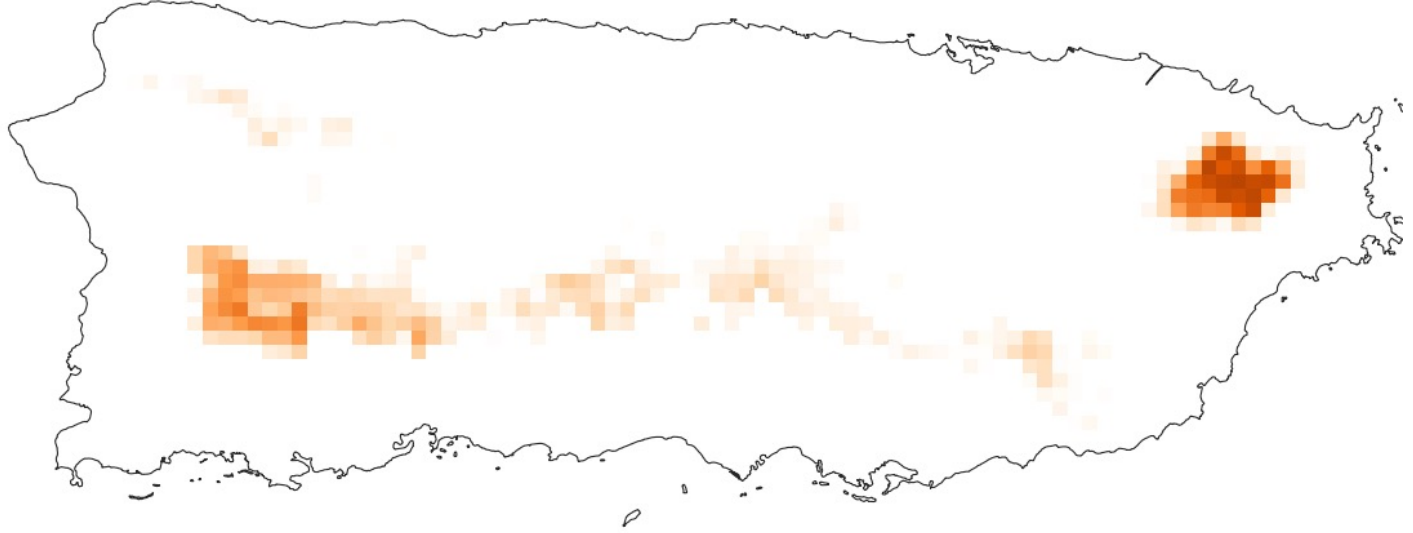

### Habitat suitability

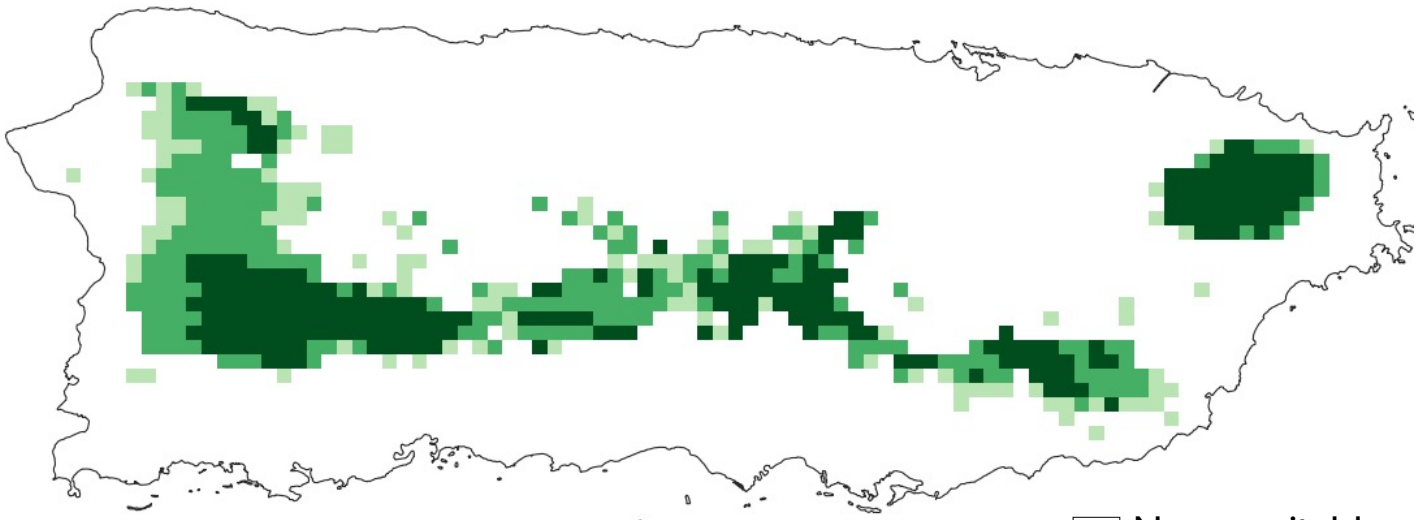

□ Never suitable  
□ Suitable in one era  
□ Suitable in two eras  
□ Always-suitable

Predicted habitat suitability

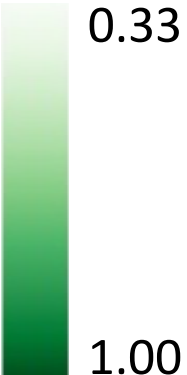



# *Setophaga adelaidae* Adelaide's Warbler Reinita Mariposera

## Historical

Historical records  
• Present

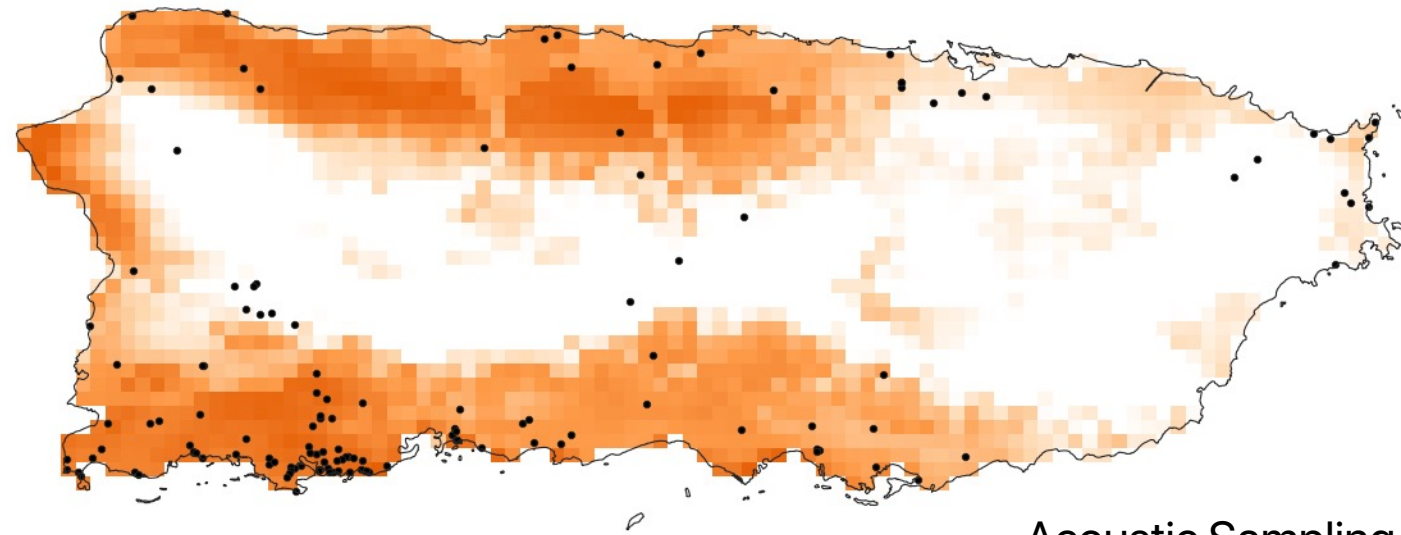

## Current

Acoustic Sampling sites  
○ Absent  
• Present

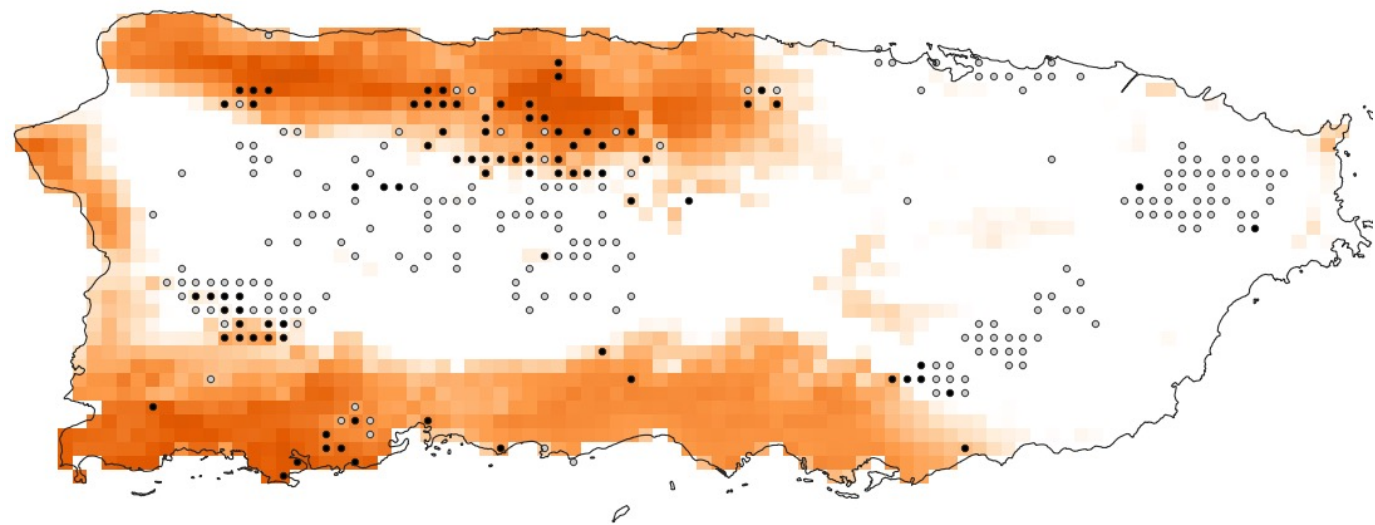

## Future

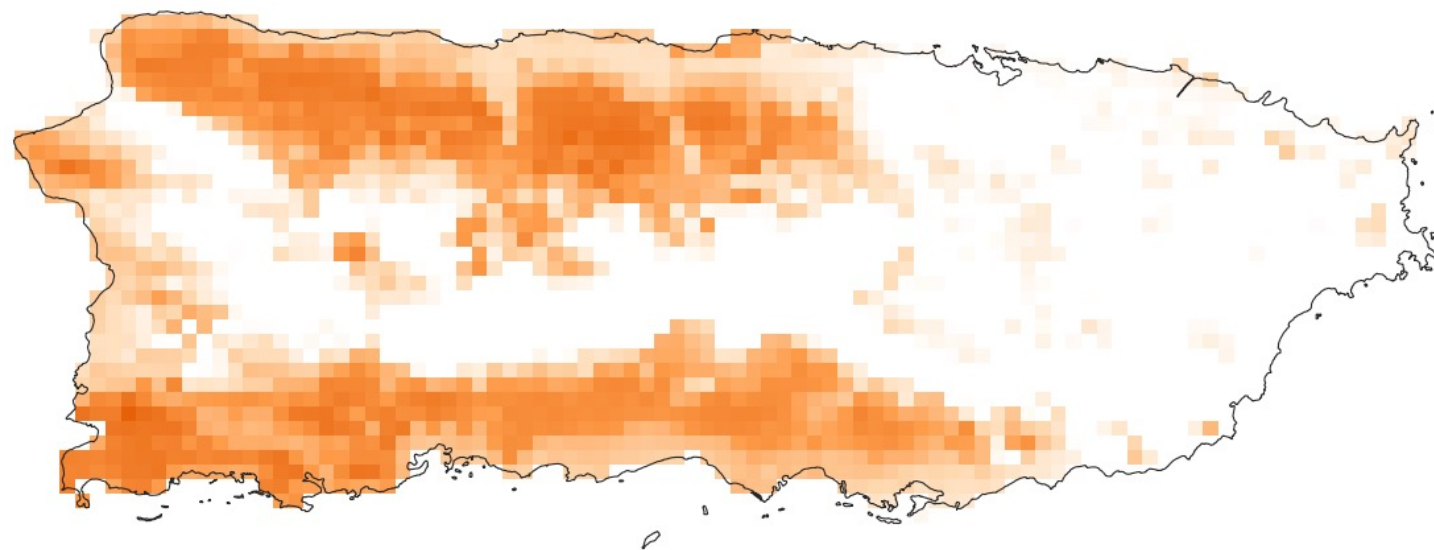

## Habitat suitability

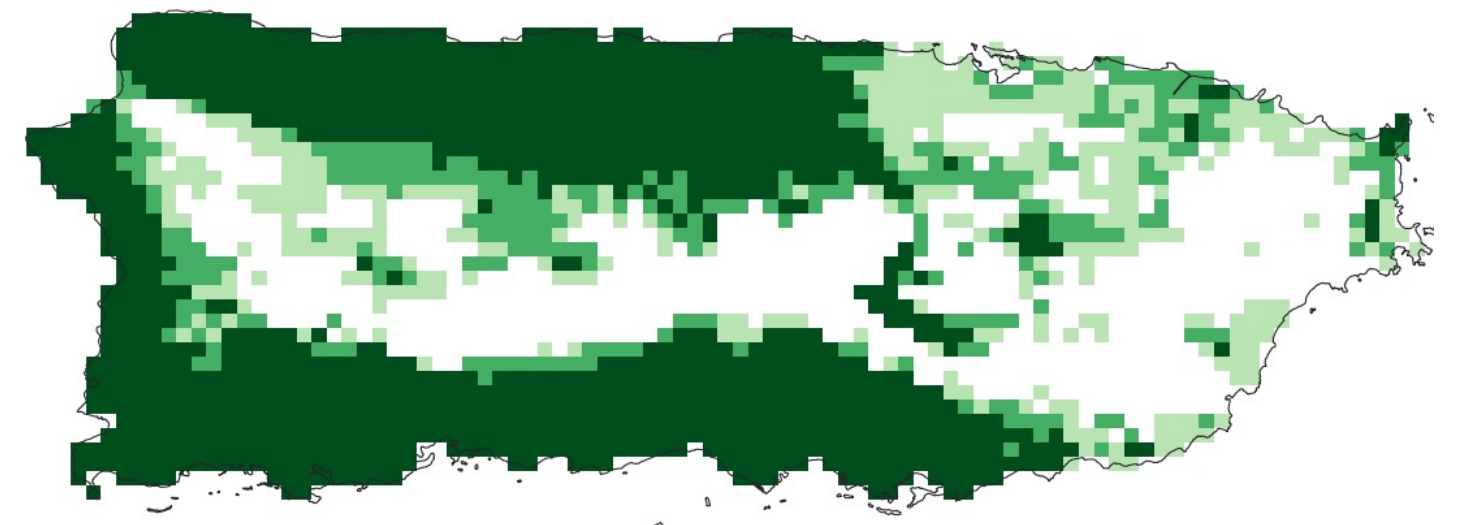

□ Never suitable  
□ Suitable in one era  
□ Suitable in two eras  
□ Always-suitable

Predicted habitat suitability

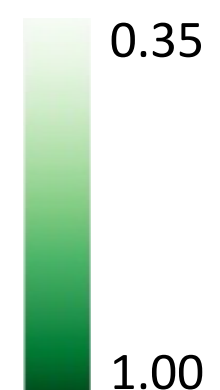

# *Setophaga angelae*

## Elfin Woods Warbler

### Reinita del Bosque Enano

### Historical

Historical records  
• Present

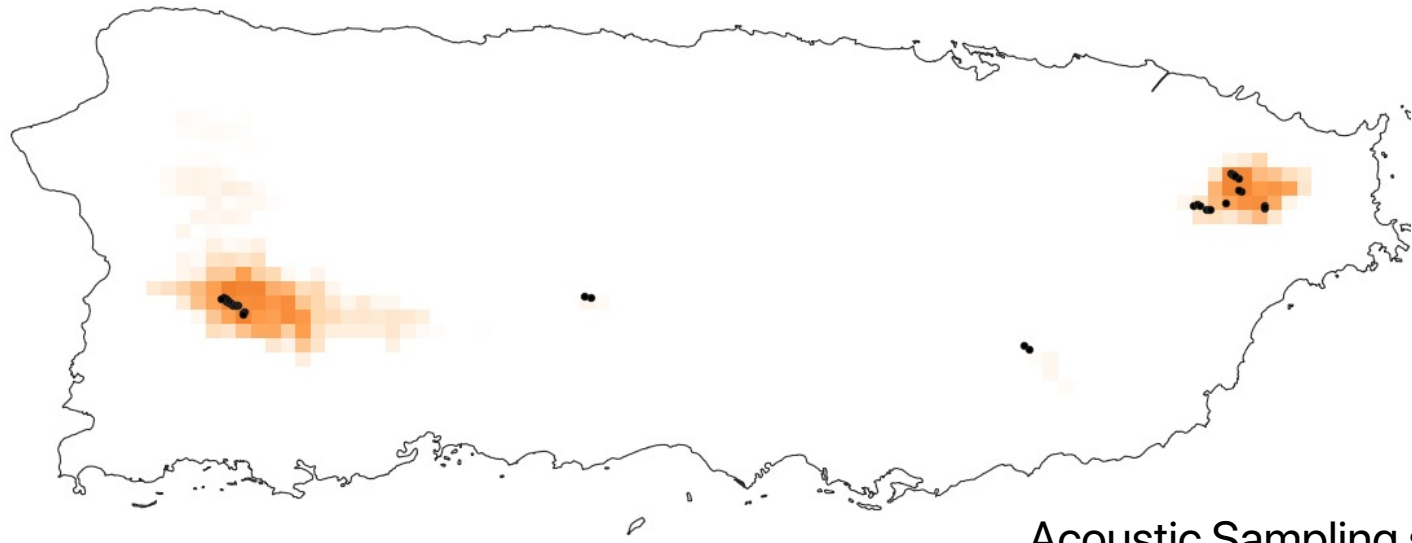

### Current

Acoustic Sampling sites  
○ Absent  
● Present

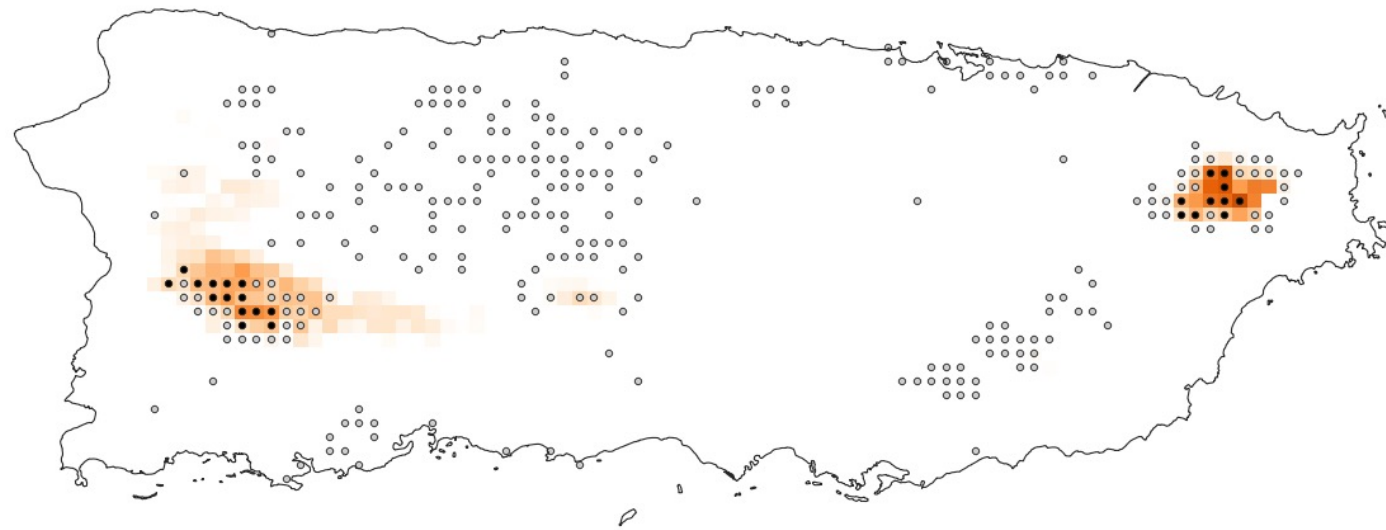

### Future

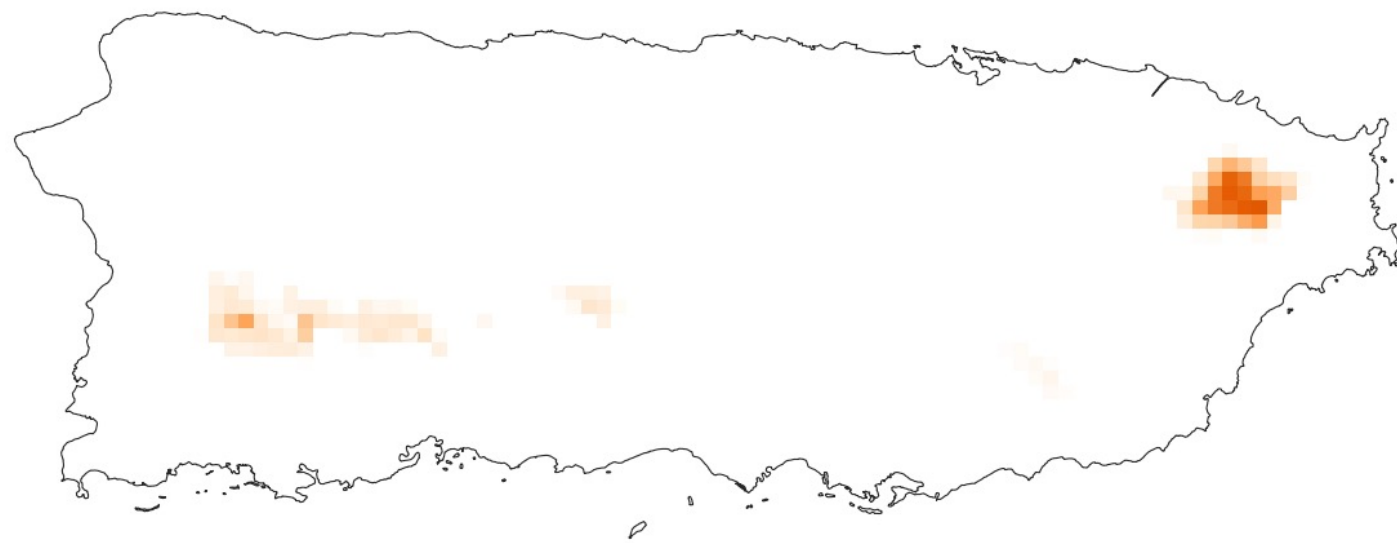

### Habitat suitability

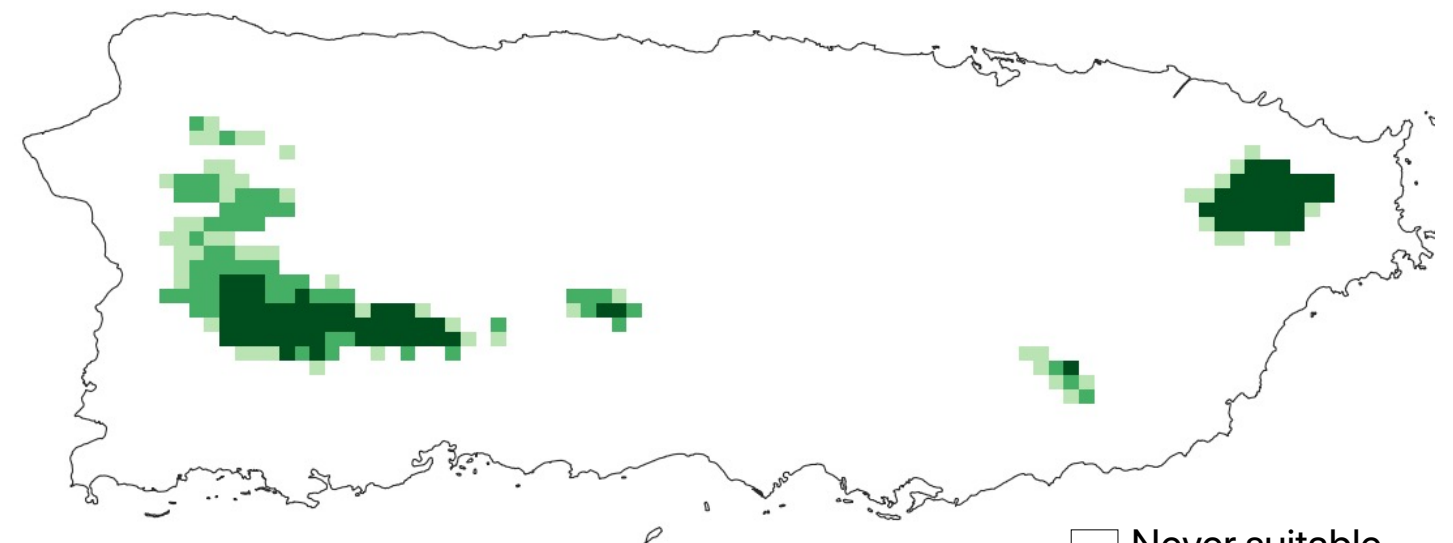

□ Never suitable  
□ Suitable in one era  
□ Suitable in two eras  
■ Always-suitable

Predicted habitat suitability

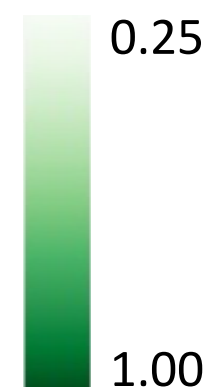



# *Spindalis portoricensis* Puerto Rican Spindalis Reina Mora

## Historical

Historical records  
• Present

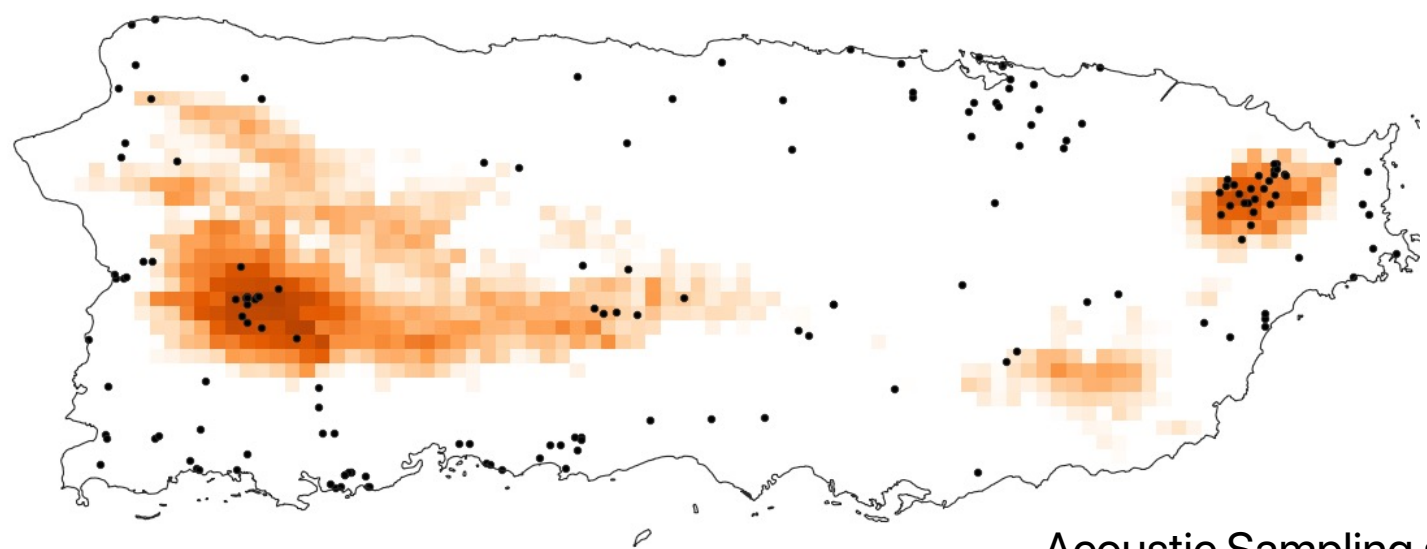

## Current

Acoustic Sampling sites  
○ Absent  
• Present

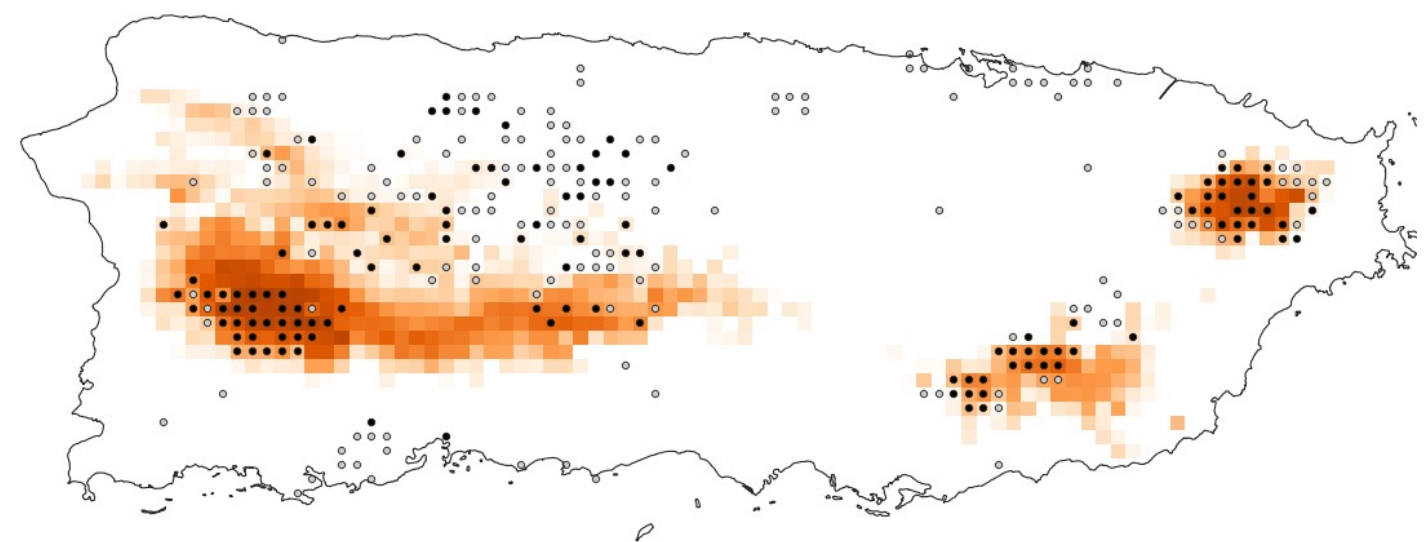

## Future

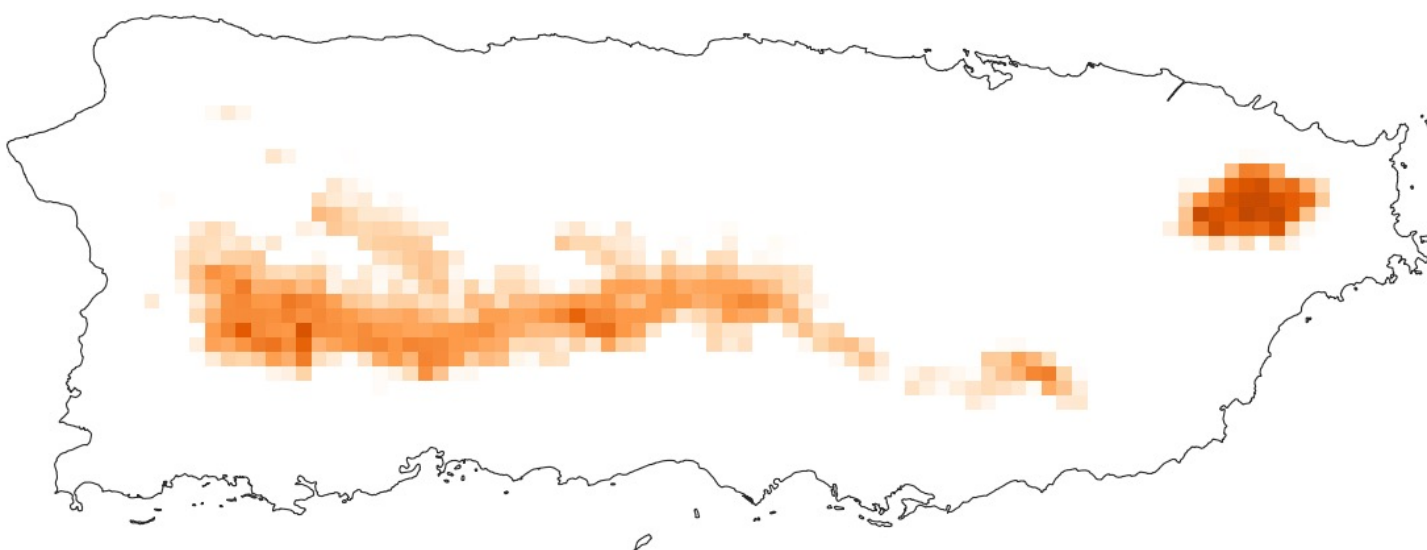

## Habitat suitability

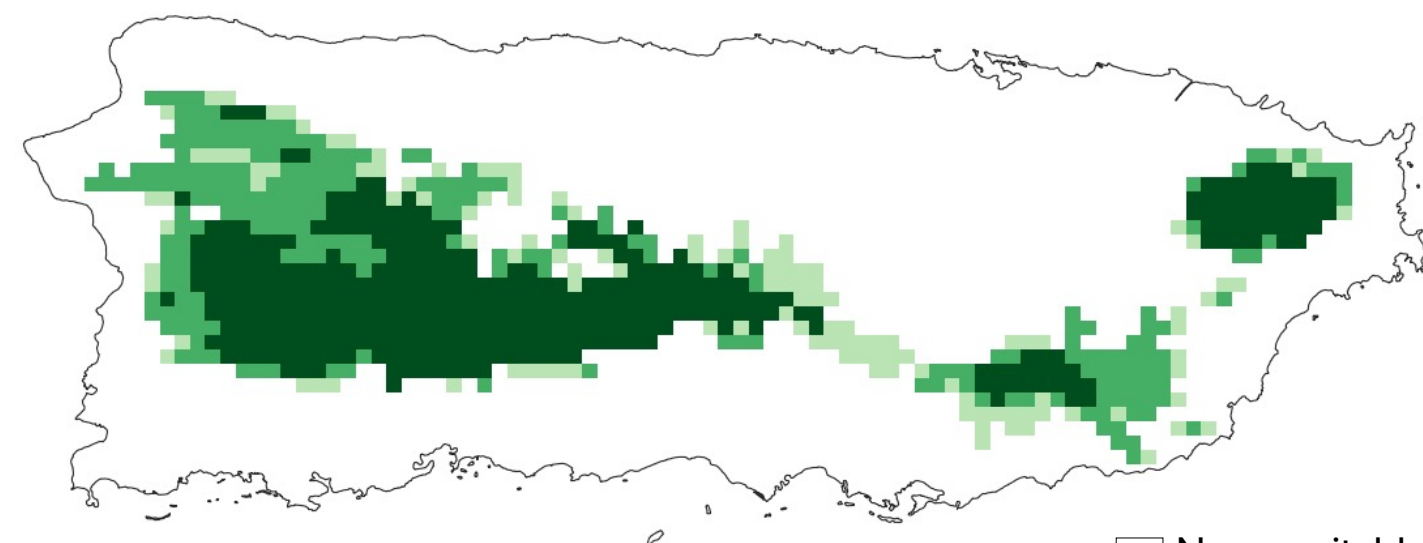

□ Never suitable  
□ Suitable in one era  
□ Suitable in two eras  
□ Always-suitable

Predicted habitat suitability

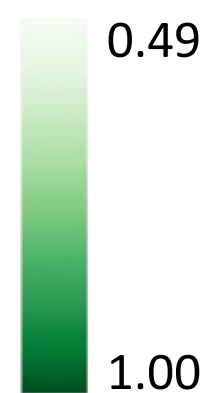

# *Vireo altiloquus* Black-whiskered Vireo Julián Chiví

### Historical

Historical records  
• Present

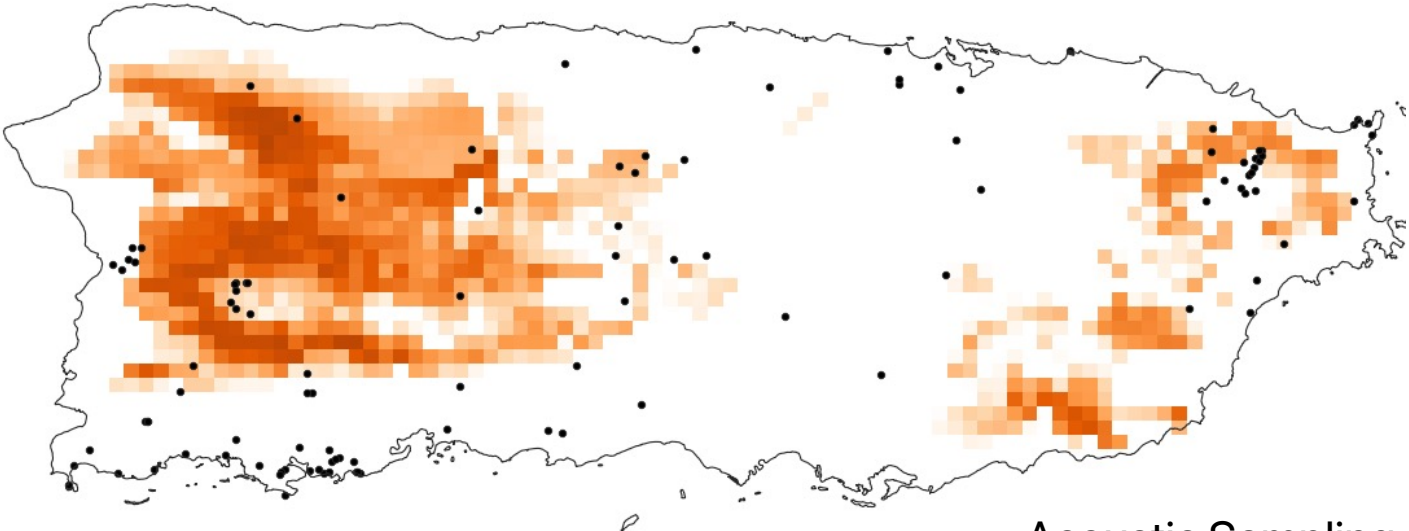

### Current

Acoustic Sampling sites  
○ Absent  
• Present

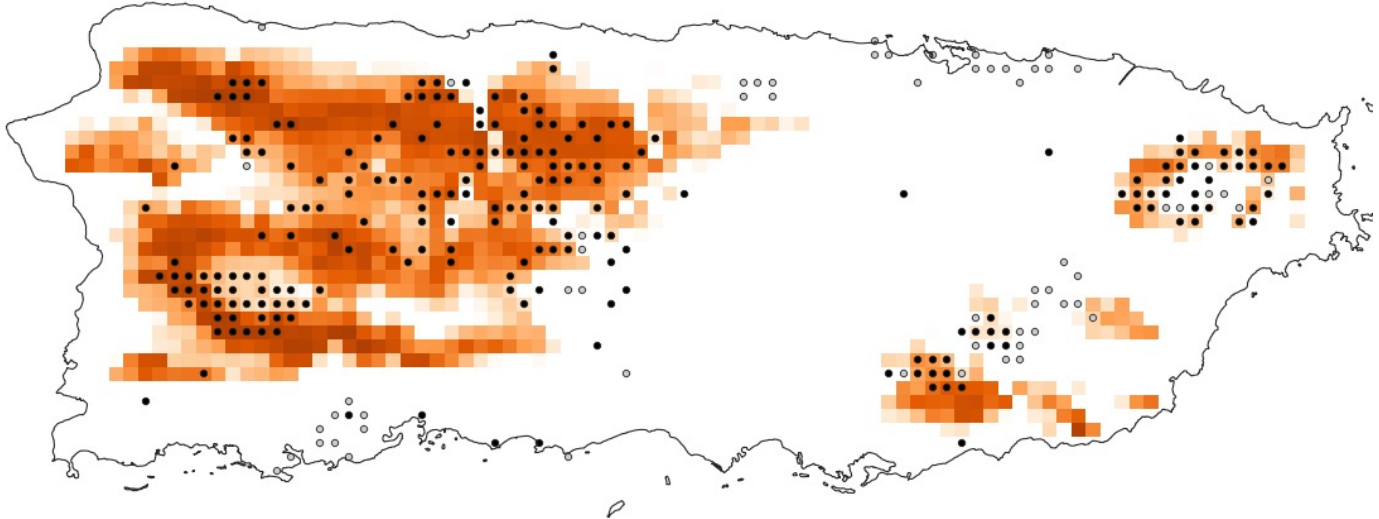

### Future

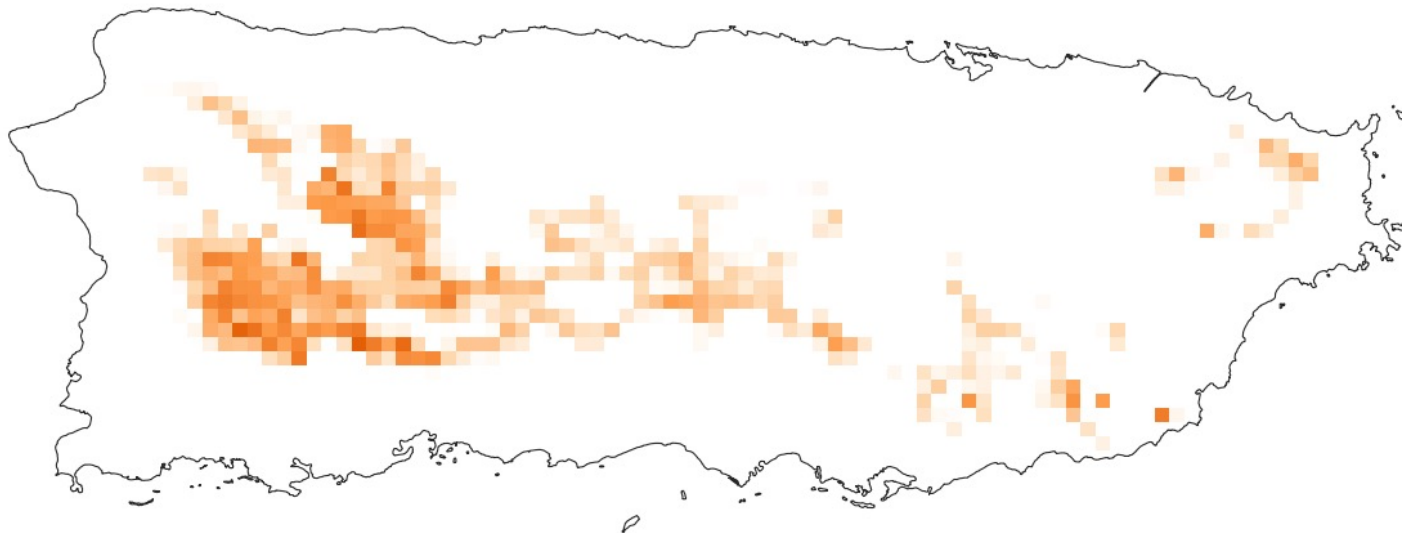

### Habitat suitability

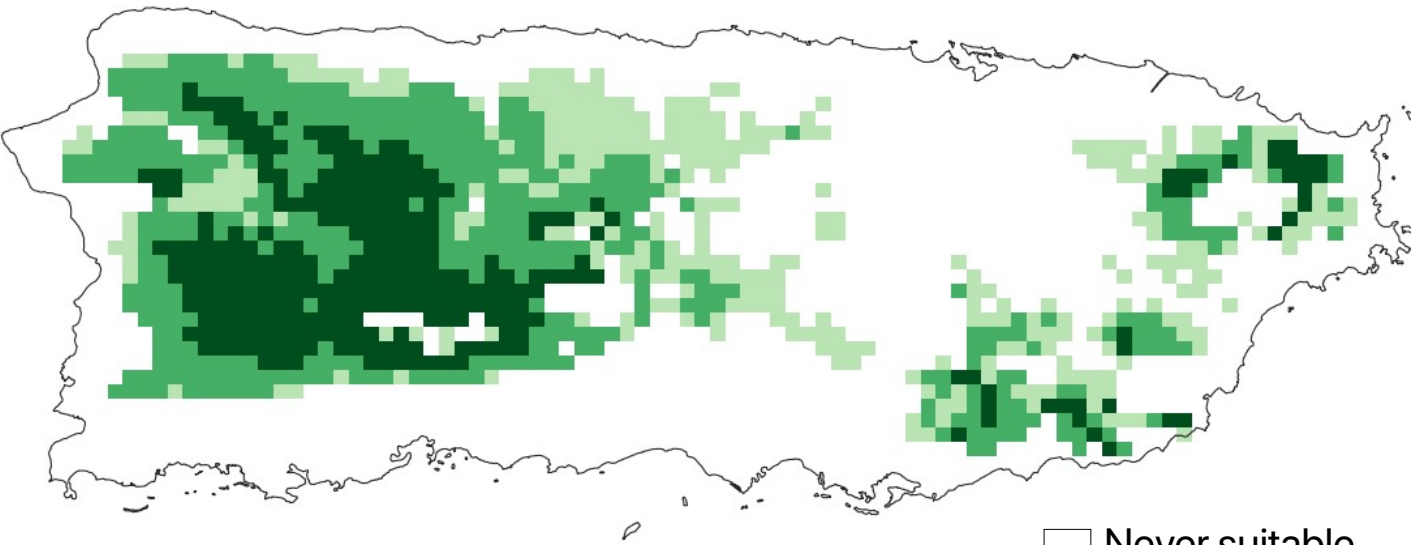

□ Never suitable  
□ Suitable in one era  
□ Suitable in two eras  
□ Always-suitable

Predicted habitat suitability

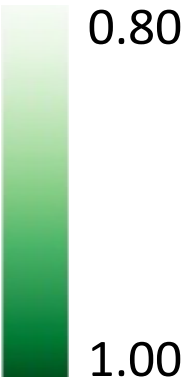



# *Vireo latimeri* Puerto Rican Vireo Bienteveo

## Historical

Historical records  
• Present

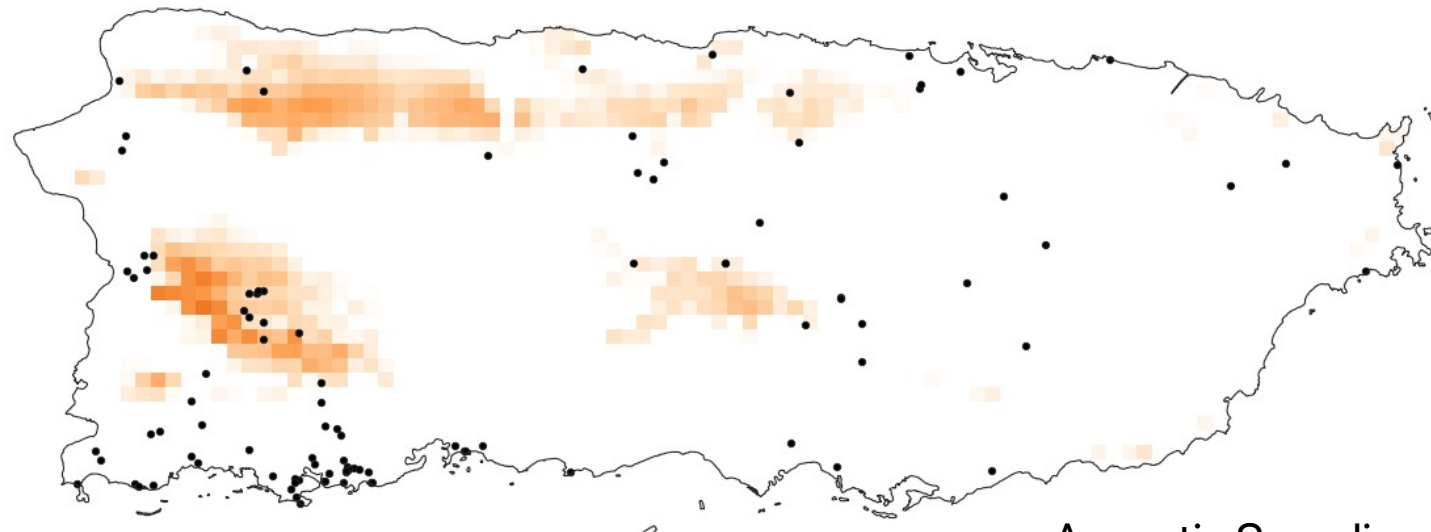

## Current

Acoustic Sampling sites  
○ Absent  
• Present

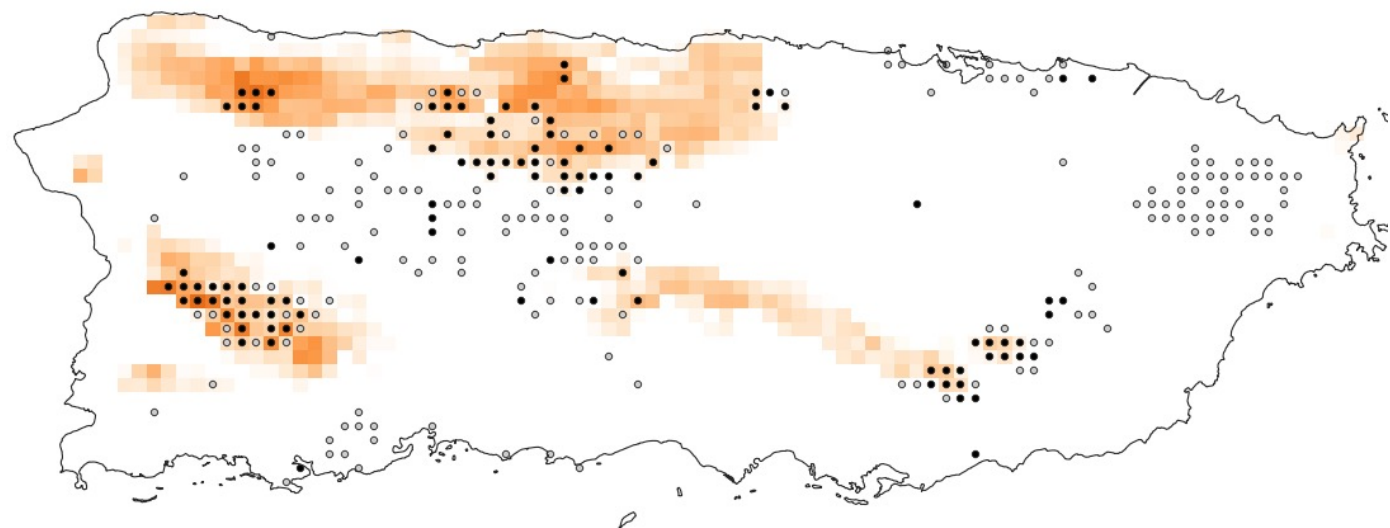

## Future

Predicted habitat suitability

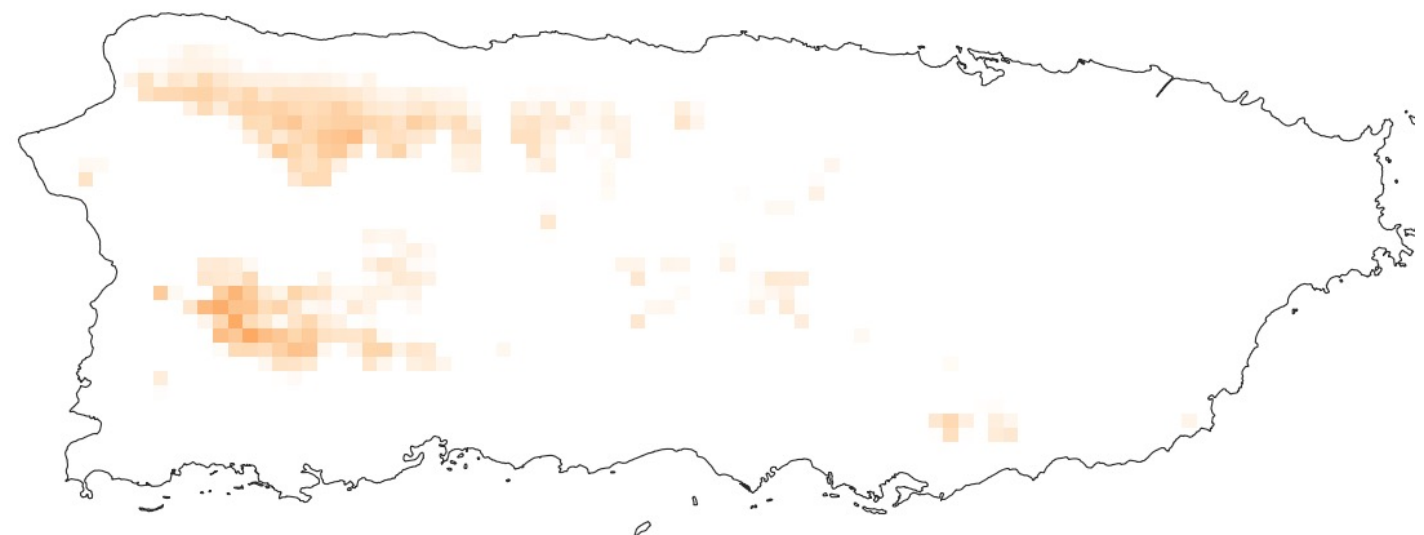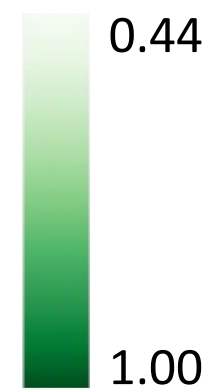

## Habitat suitability

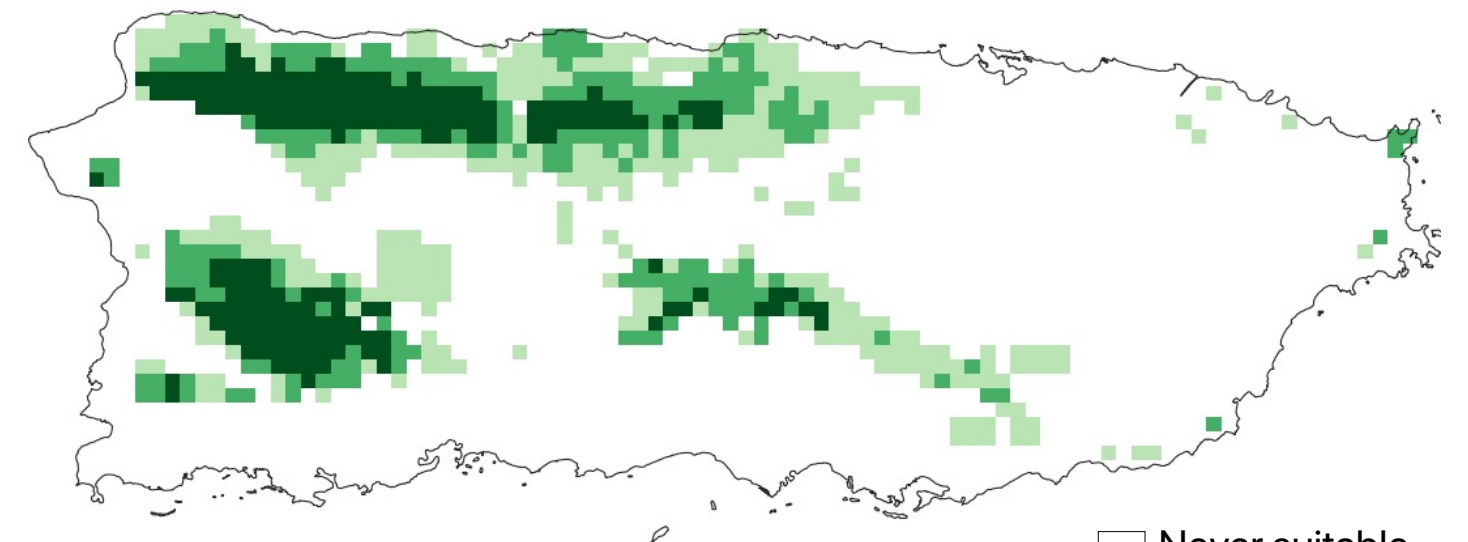

□ Never suitable  
□ Suitable in one era  
□ Suitable in two eras  
■ Always-suitable

*E. brittoni*  
Grass coqui  
Coqui de las Hierbas

Historical

Historical records  
• Present

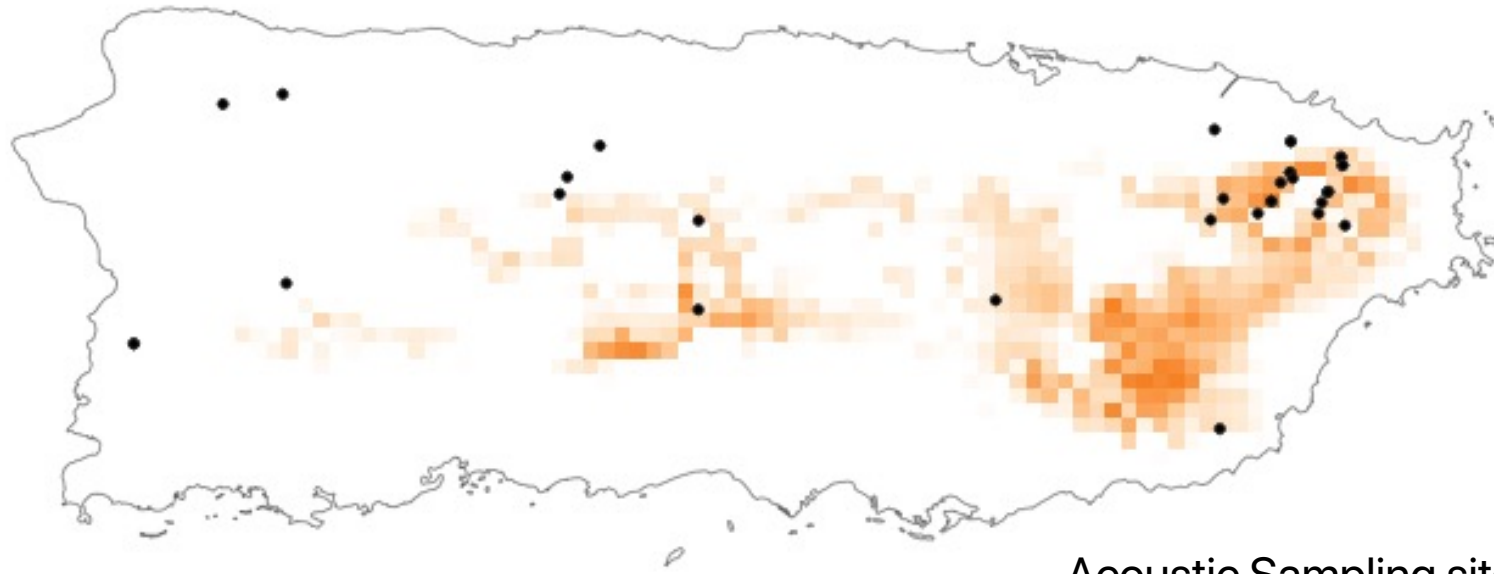

Current

Acoustic Sampling sites  
○ Absent  
• Present

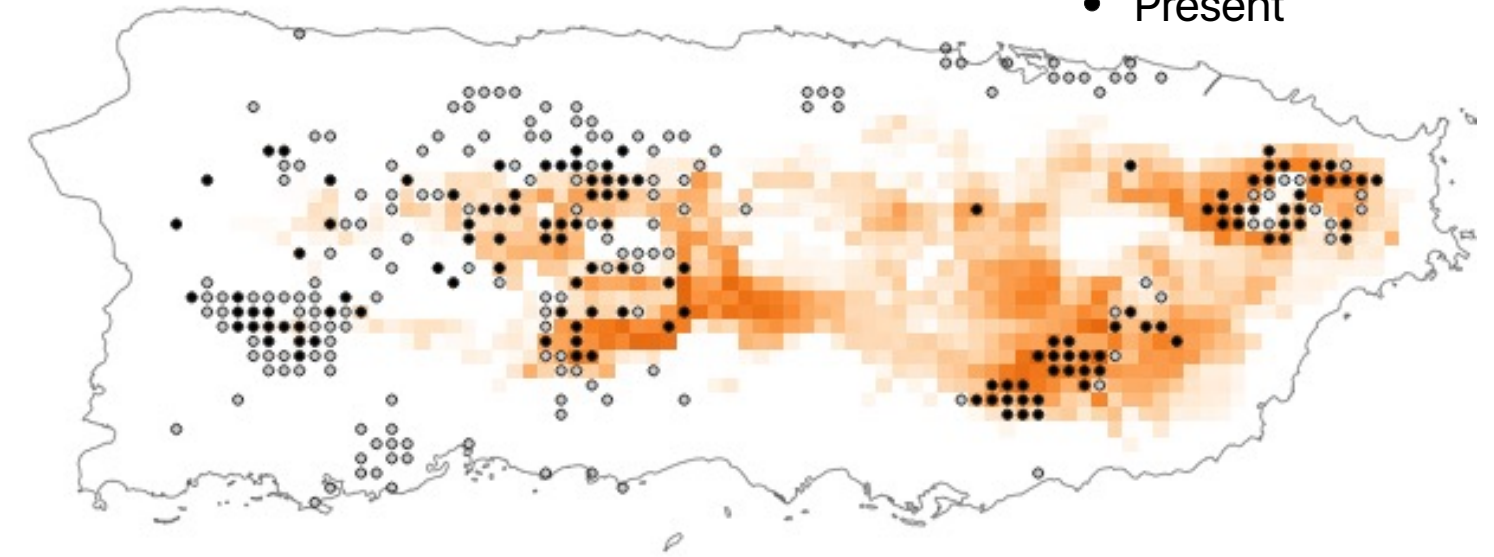

Future

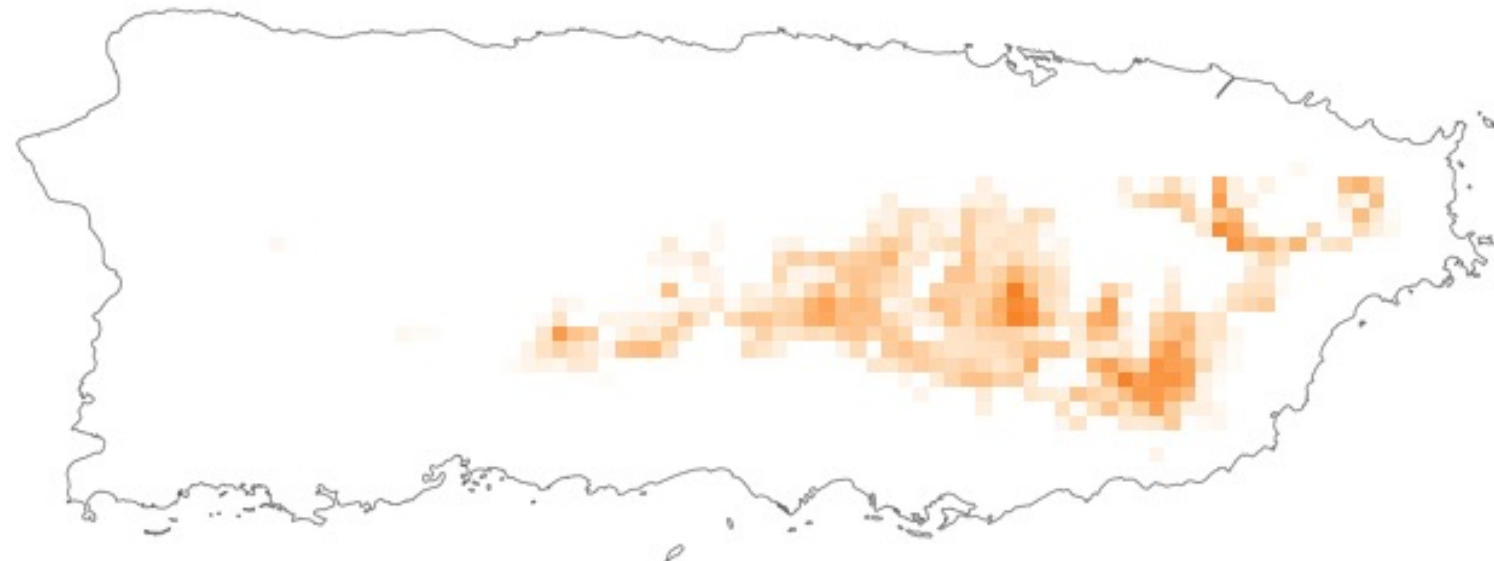

Predicted habitat suitability

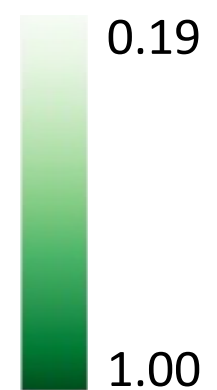

Habitat suitability

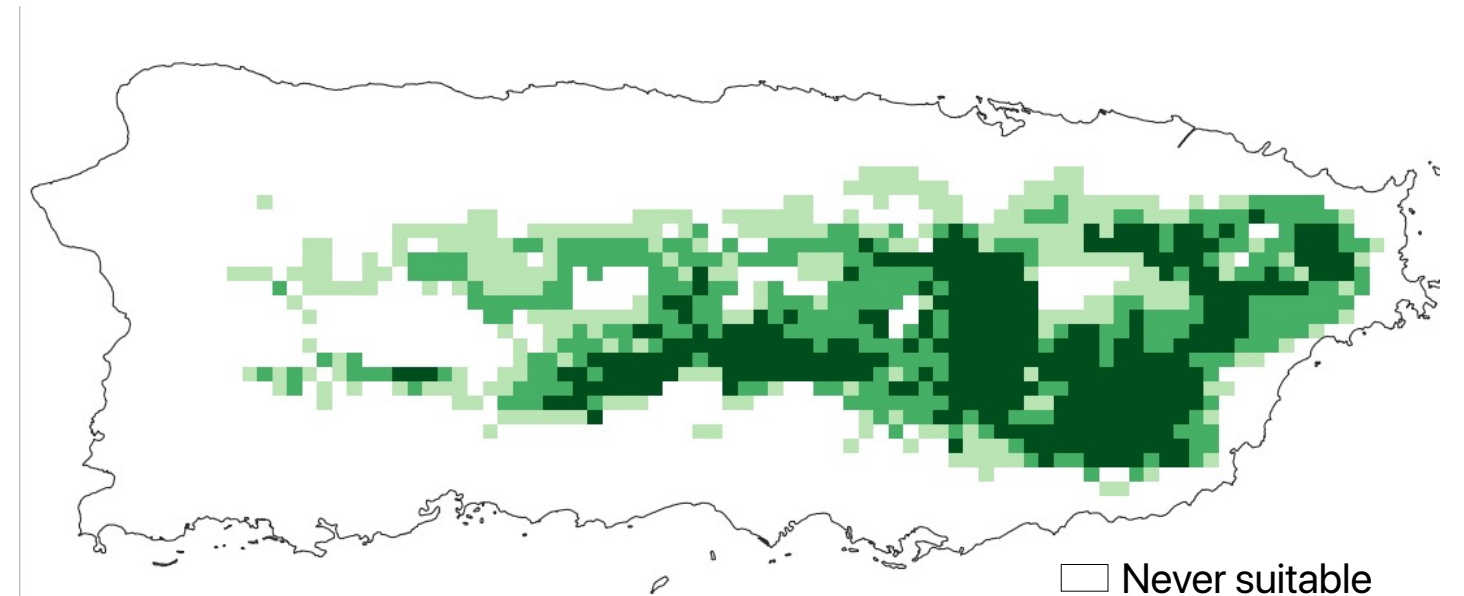

□ Never suitable  
□ Suitable in one era  
□ Suitable in two eras  
□ Always-suitable



*E. gryllus*  
Cricket coqui  
Coqui Grillo

Historical

Historical records  
• Present

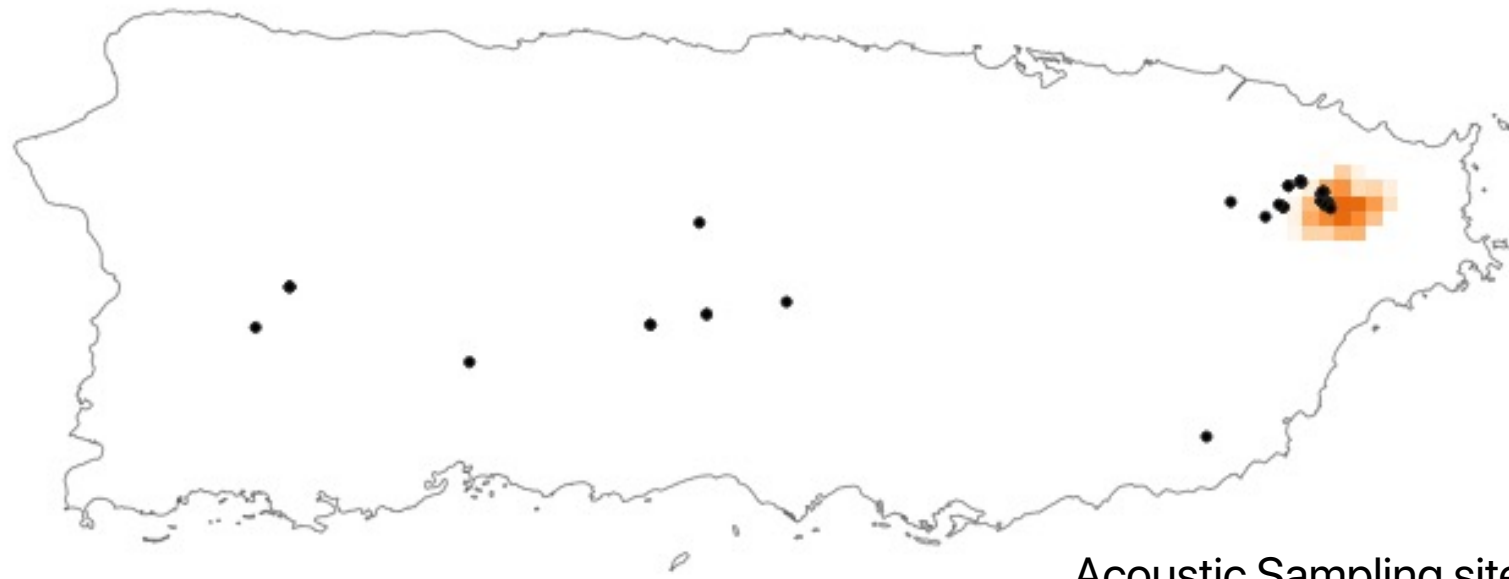

Current

Acoustic Sampling sites  
○ Absent  
• Present

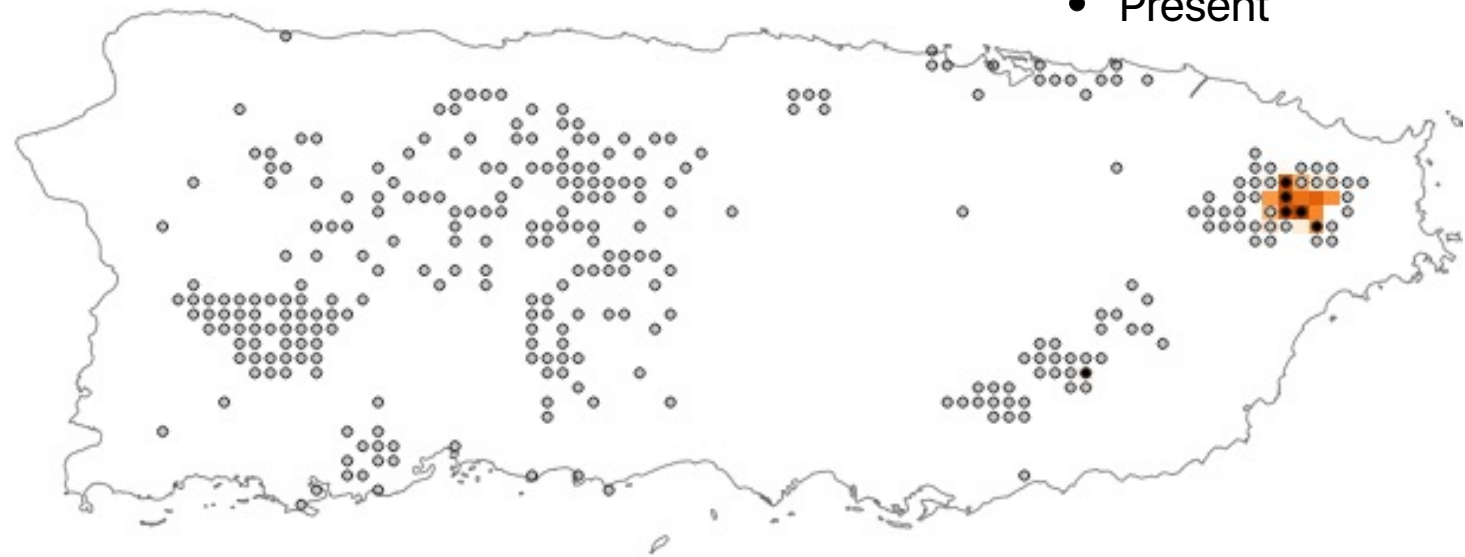

Future

Predicted habitat suitability

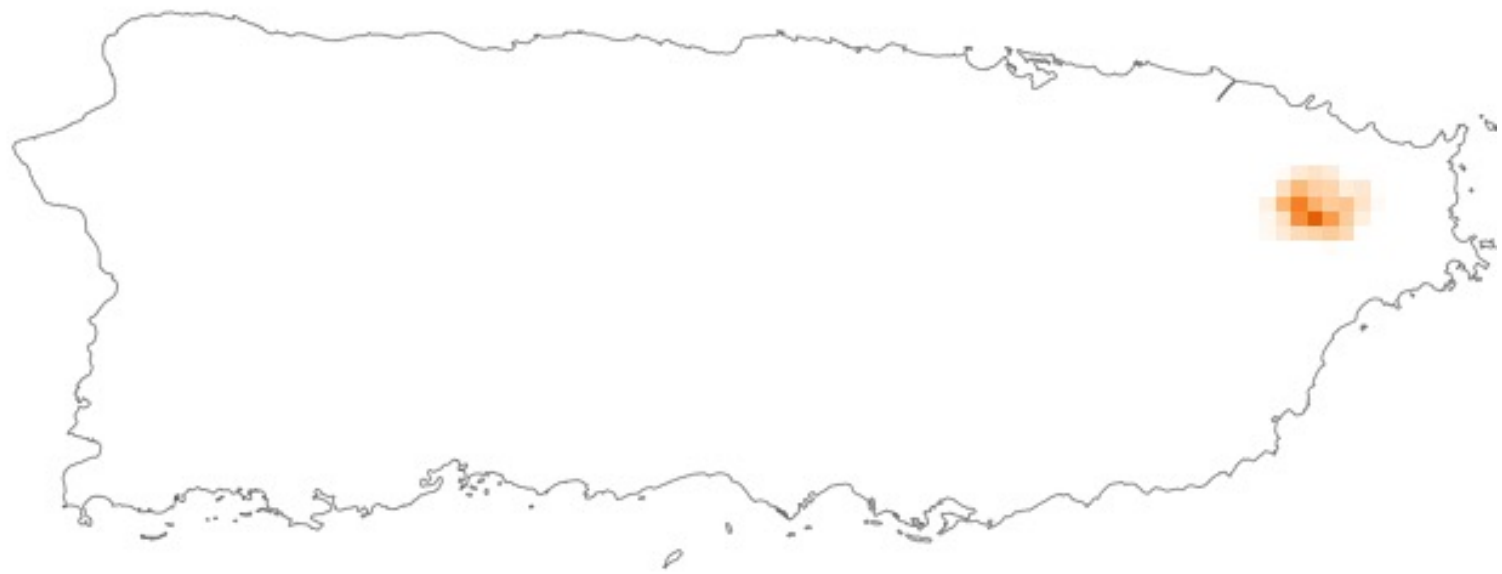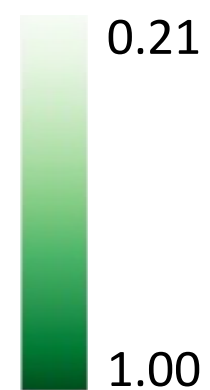

Habitat suitability

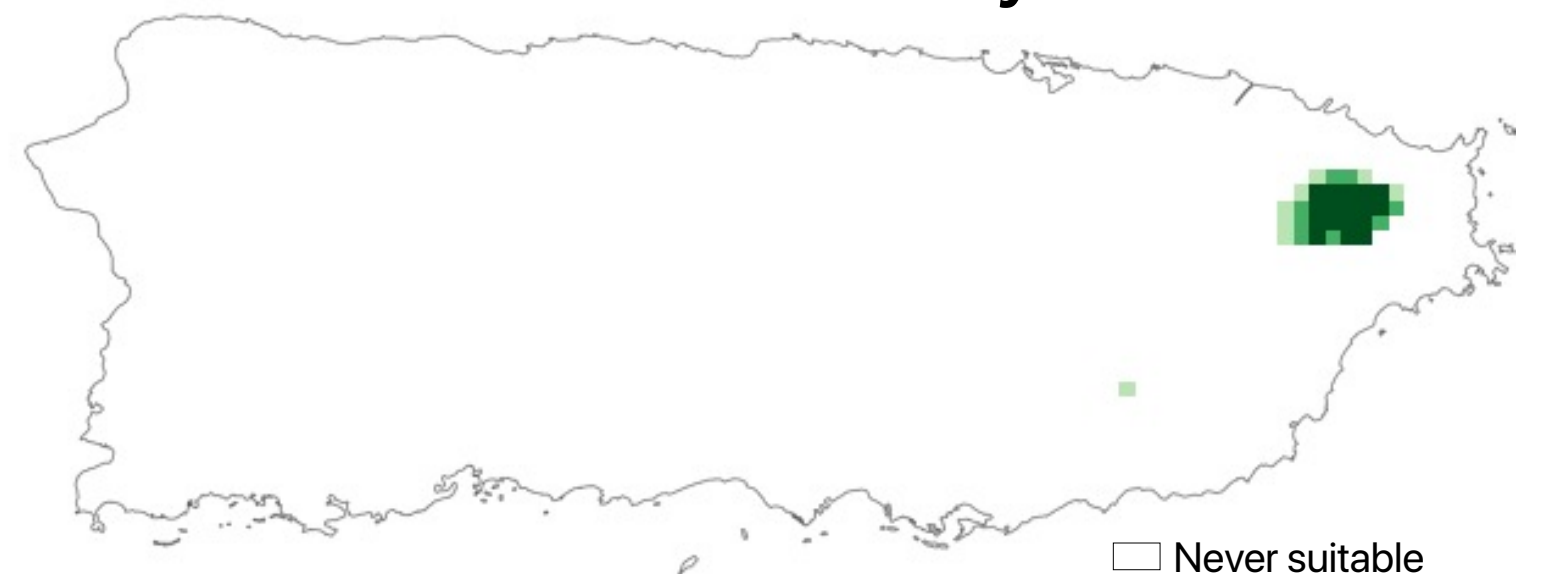

□ Never suitable  
□ Suitable in one era  
■ Suitable in two eras  
■ Always-suitable

*E. hedricki*  
Hedrick's coqui  
Coqui de Hedrick

Historical

Historical records  
• Present

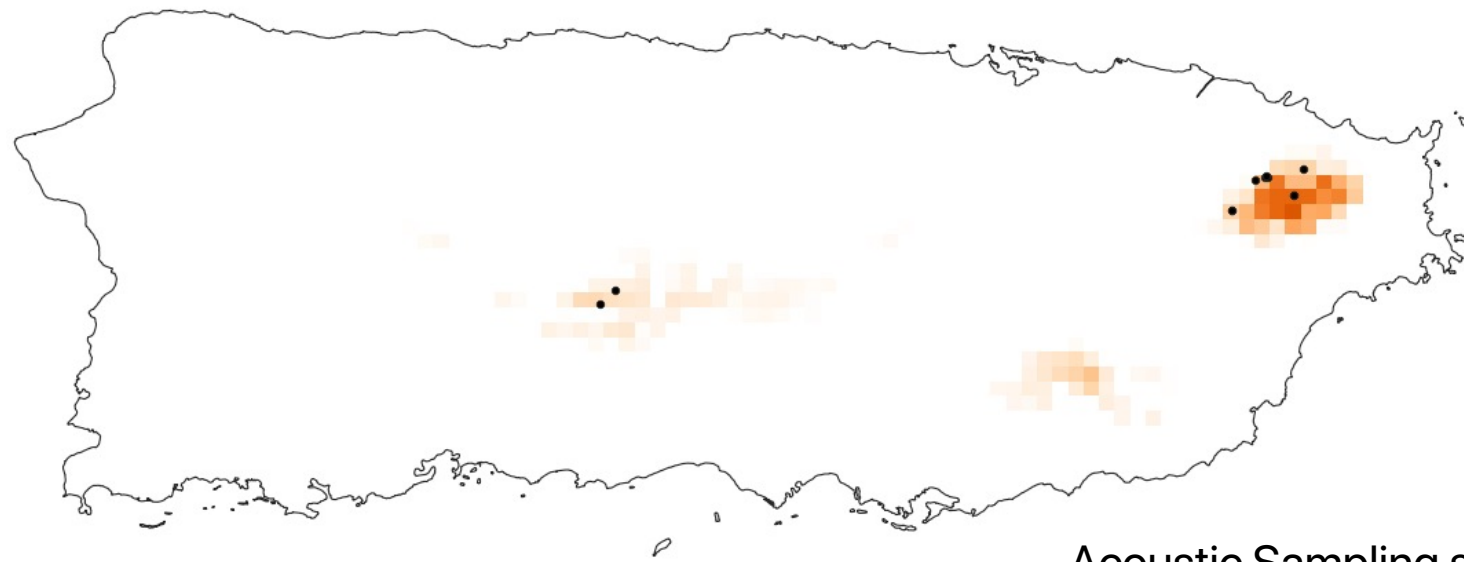

Current

Acoustic Sampling sites  
○ Absent  
• Present

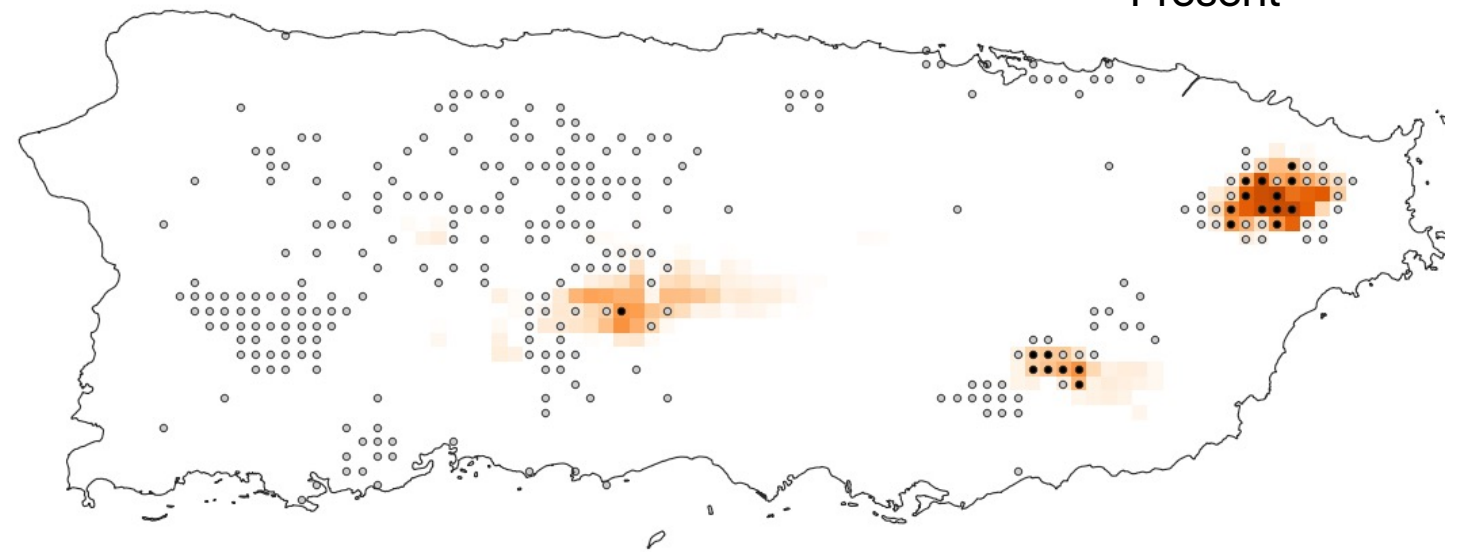

Future

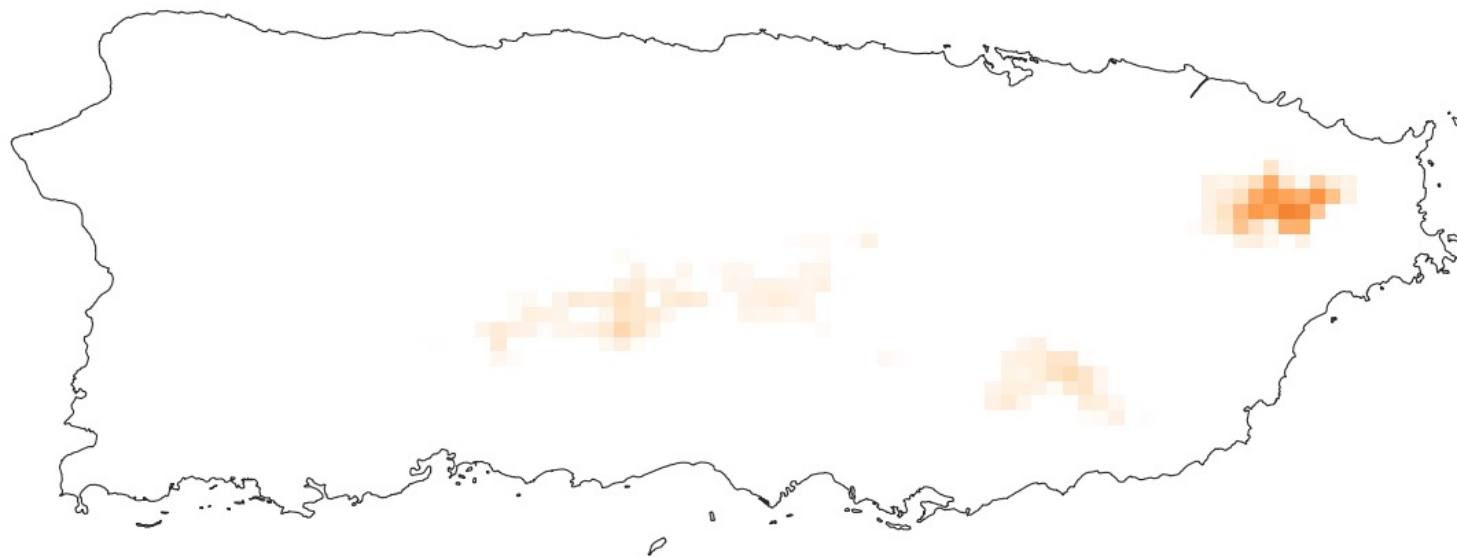

Habitat suitability

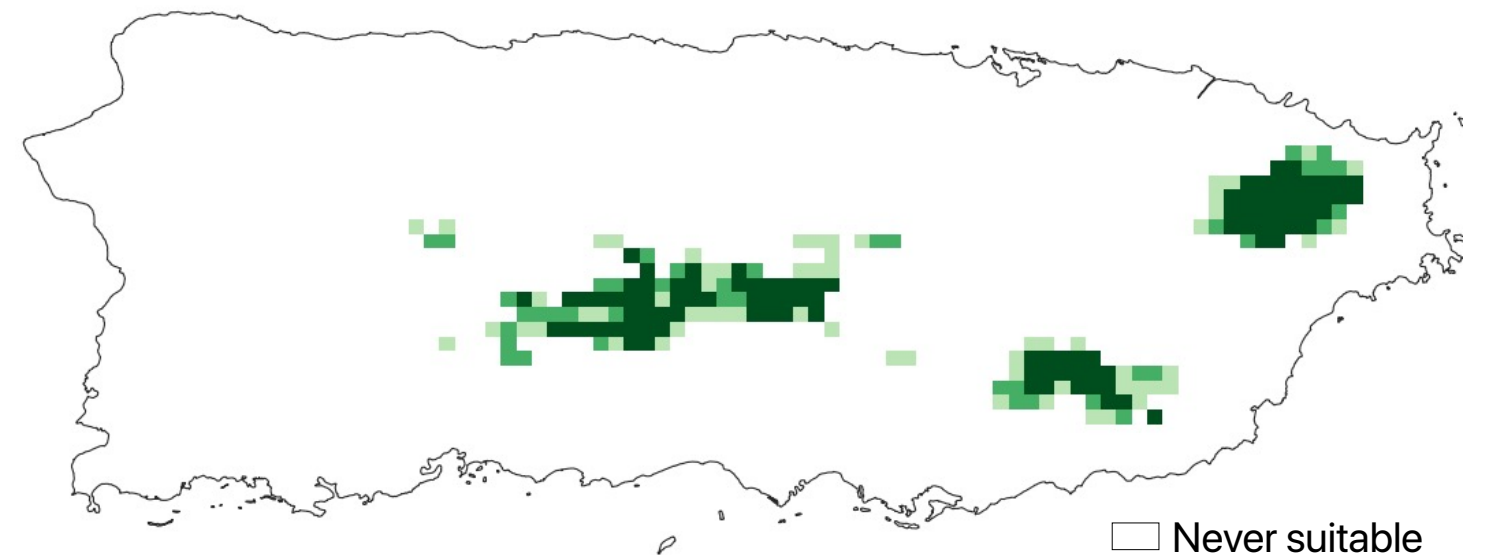

Predicted habitat suitability

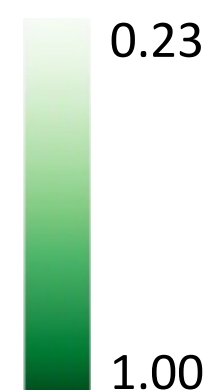

- Never suitable
- Suitable in one era
- Suitable in two eras
- Always-suitable



# *E. locustus* Locust coqui Coqui Martillito

## Historical

Historical records  
• Present

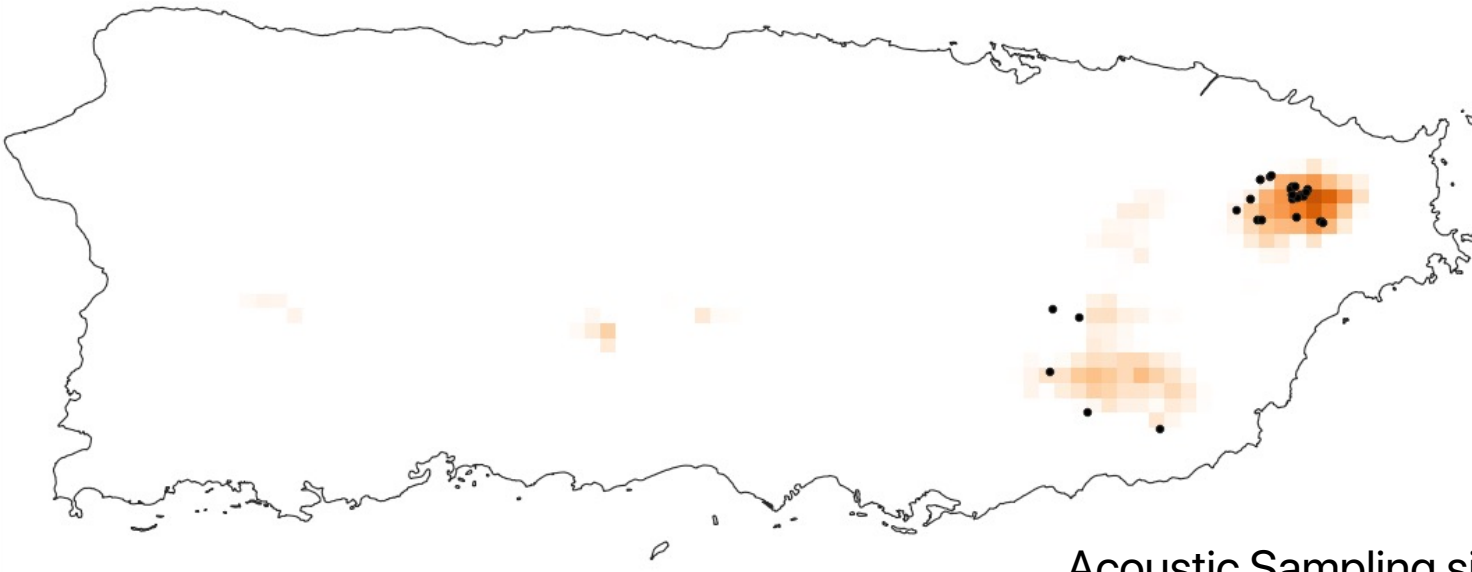

## Current

Acoustic Sampling sites  
○ Absent  
● Present

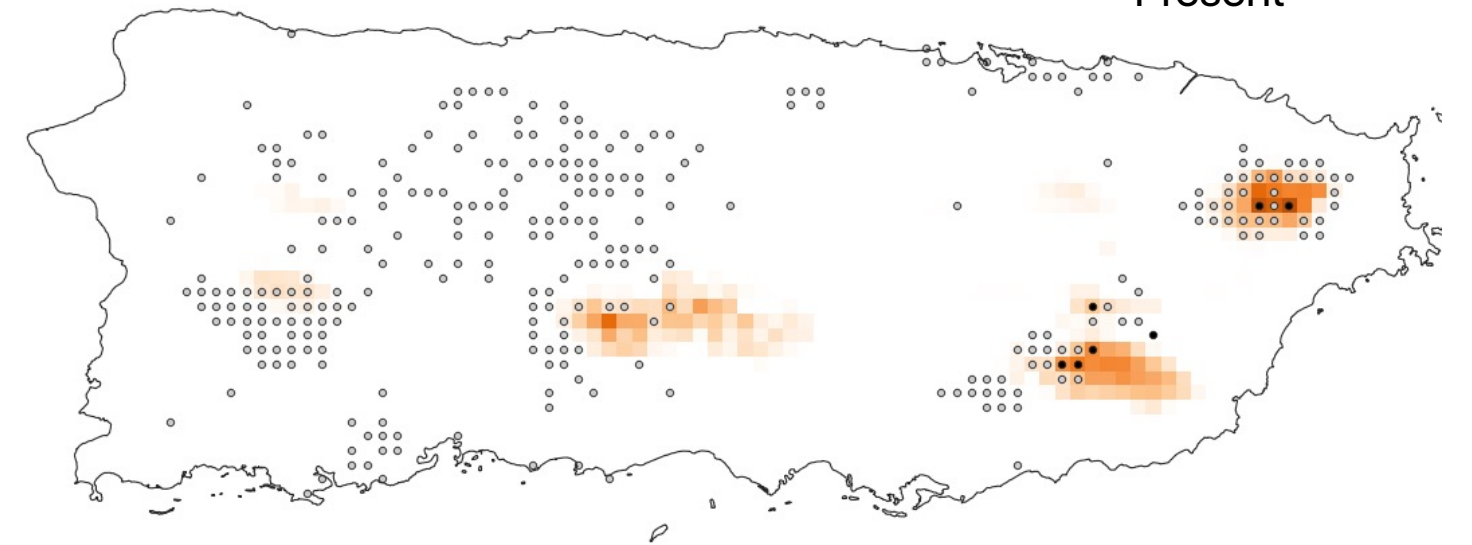

## Future

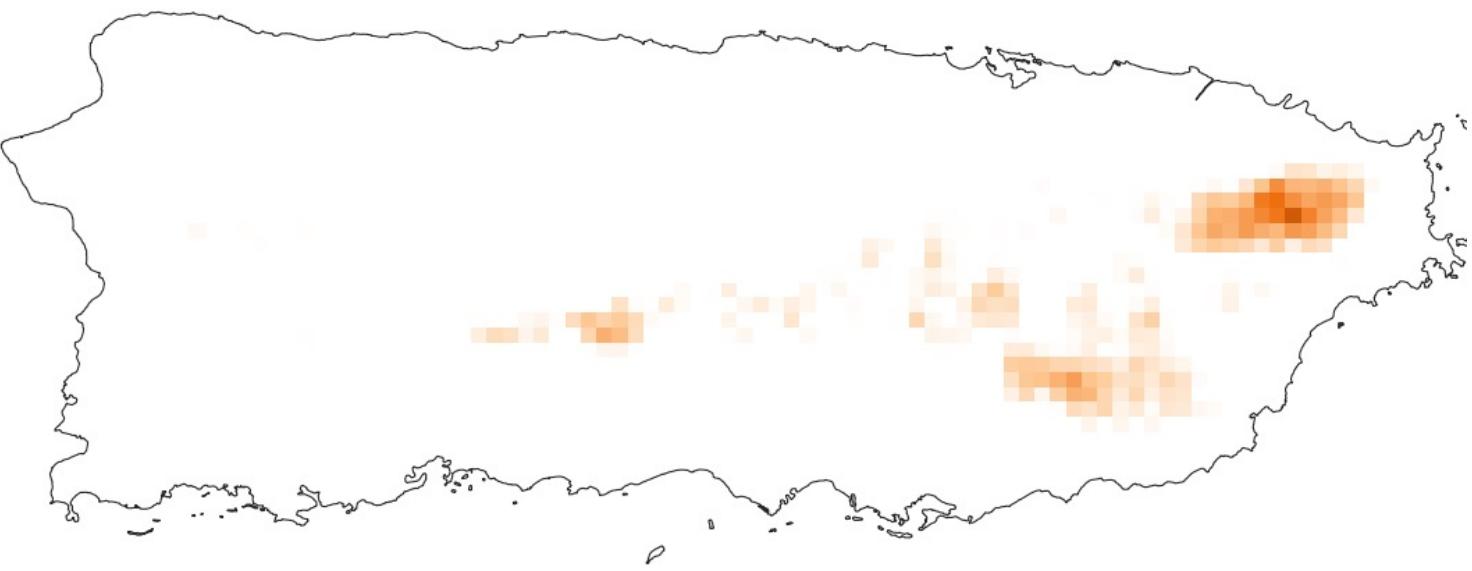

## Habitat suitability

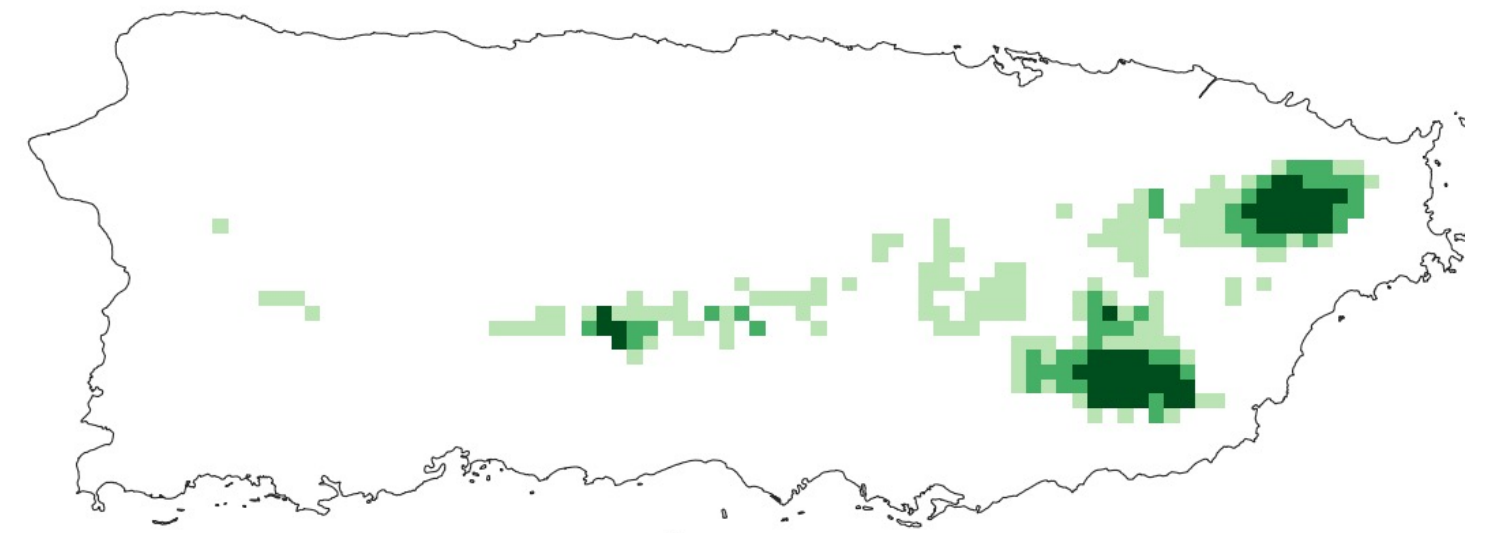

□ Never suitable  
□ Suitable in one era  
□ Suitable in two eras  
□ Always-suitable

Predicted habitat suitability

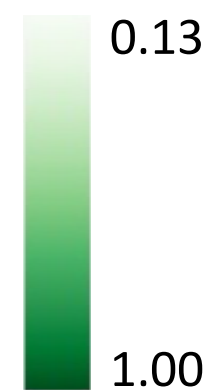

# *E. portoricensis* Mountain coqui Coqui de la montaña

## Historical

Historical records  
• Present

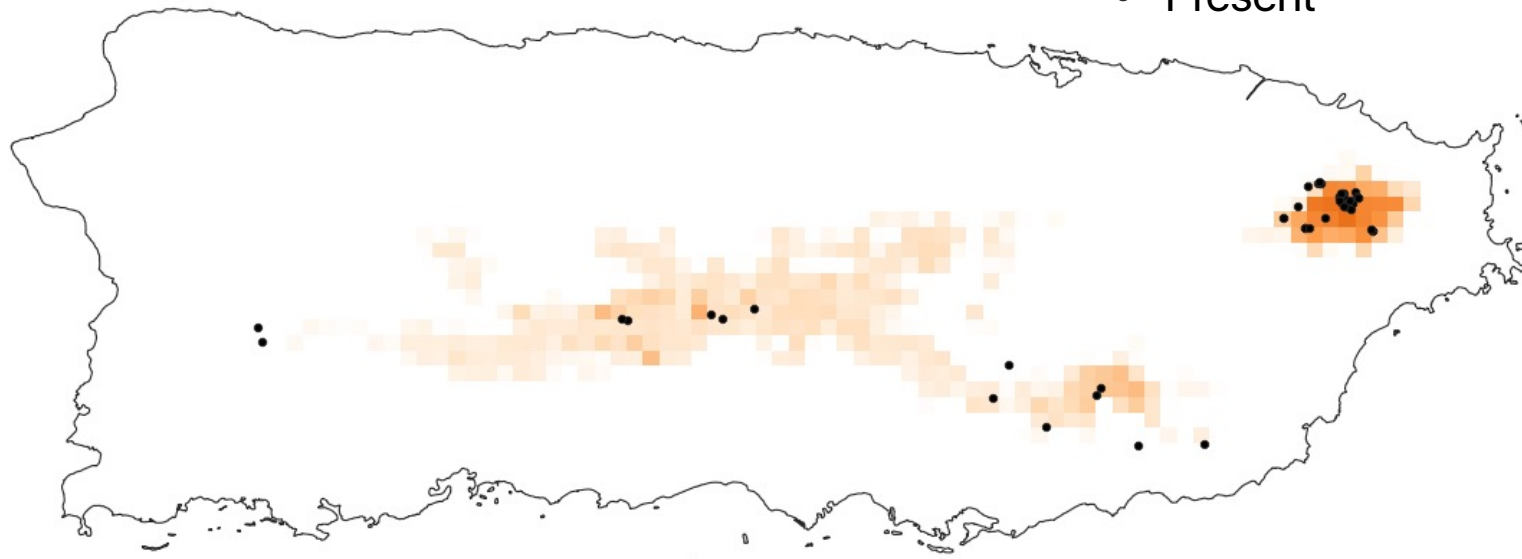

## Current

Acoustic Sampling sites  
○ Absent  
● Present

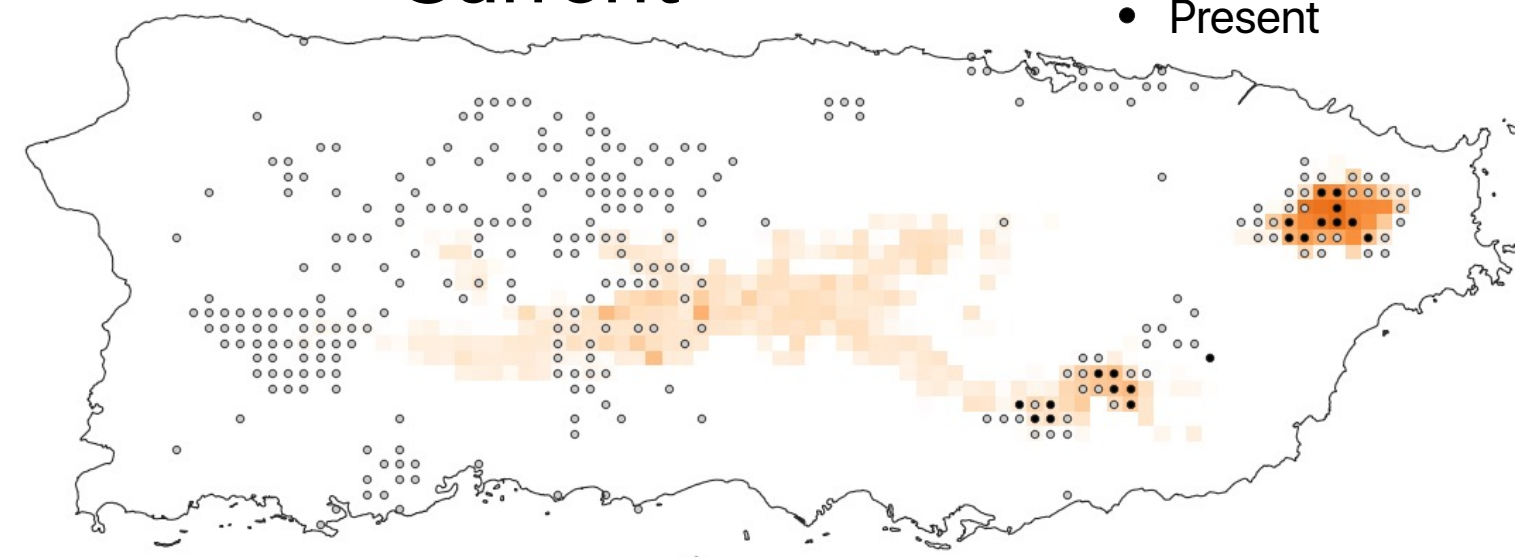

## Future

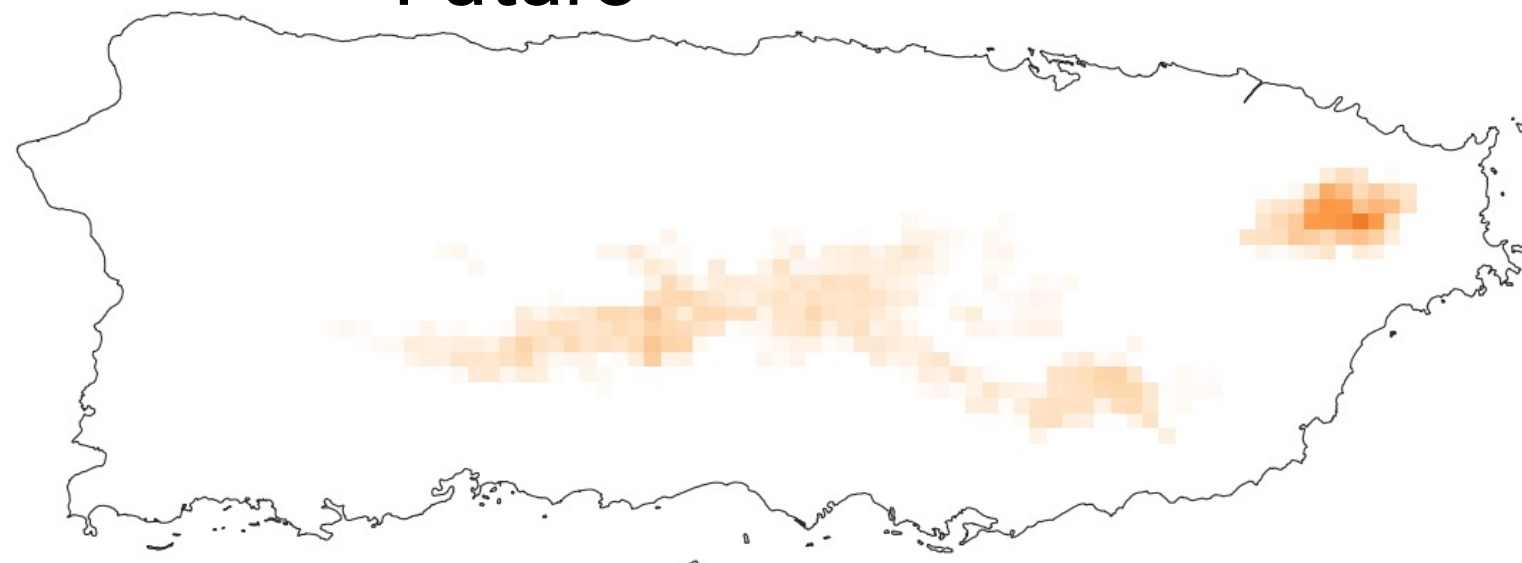

Predicted habitat suitability

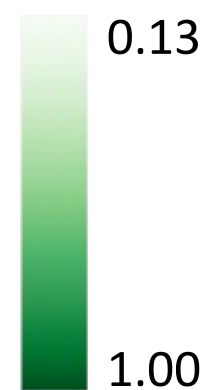

## Habitat suitability

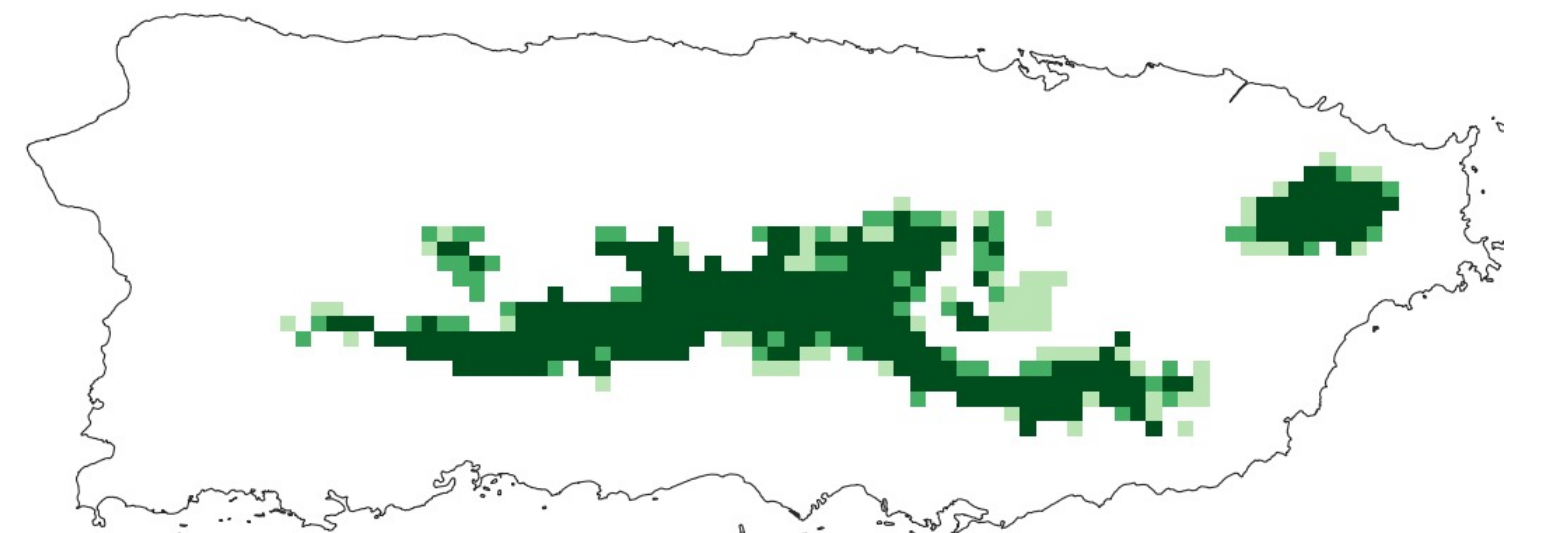

- Never suitable
- Suitable in one era
- Suitable in two eras
- Always-suitable



*E. richmondi*  
Richmond's coqui  
Coqui Caoba

Historical

Historical records  
• Present

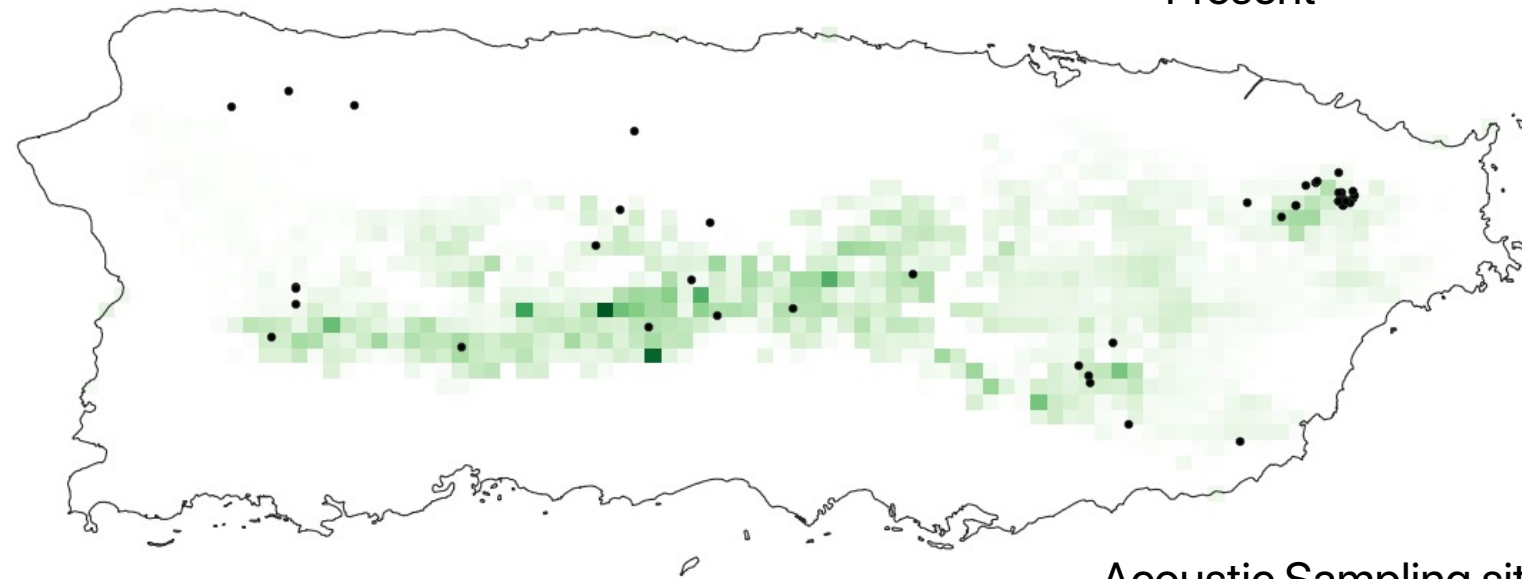

Current

Acoustic Sampling sites  
○ Absent  
• Present

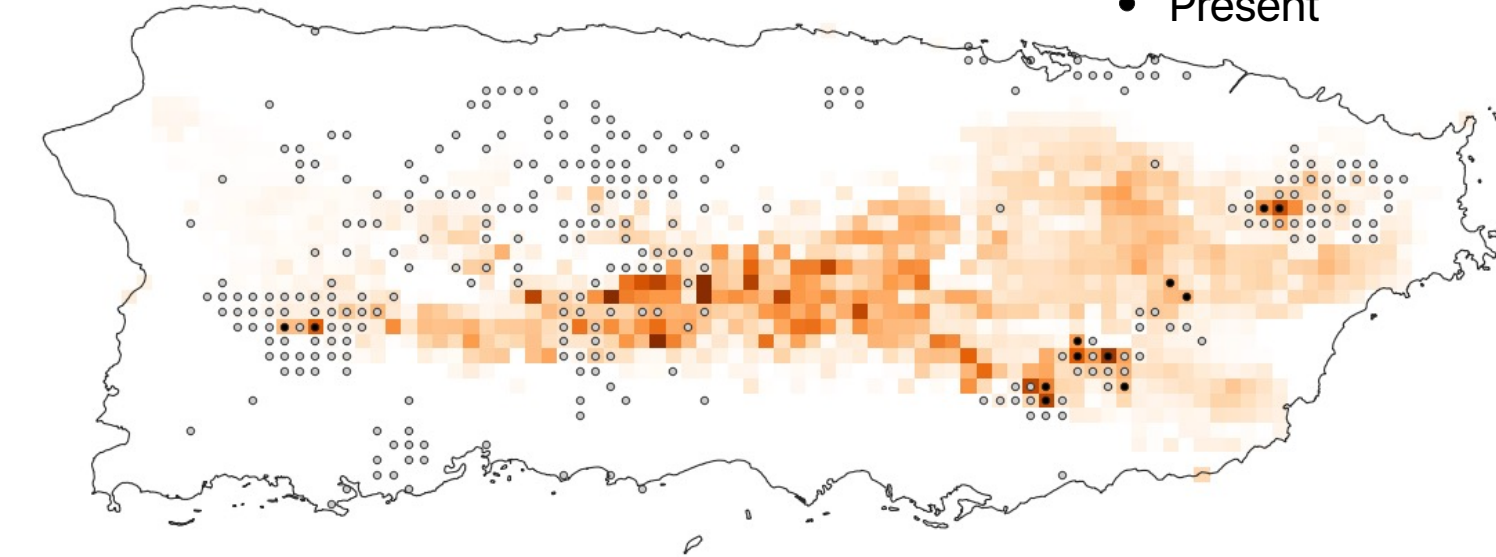

Future

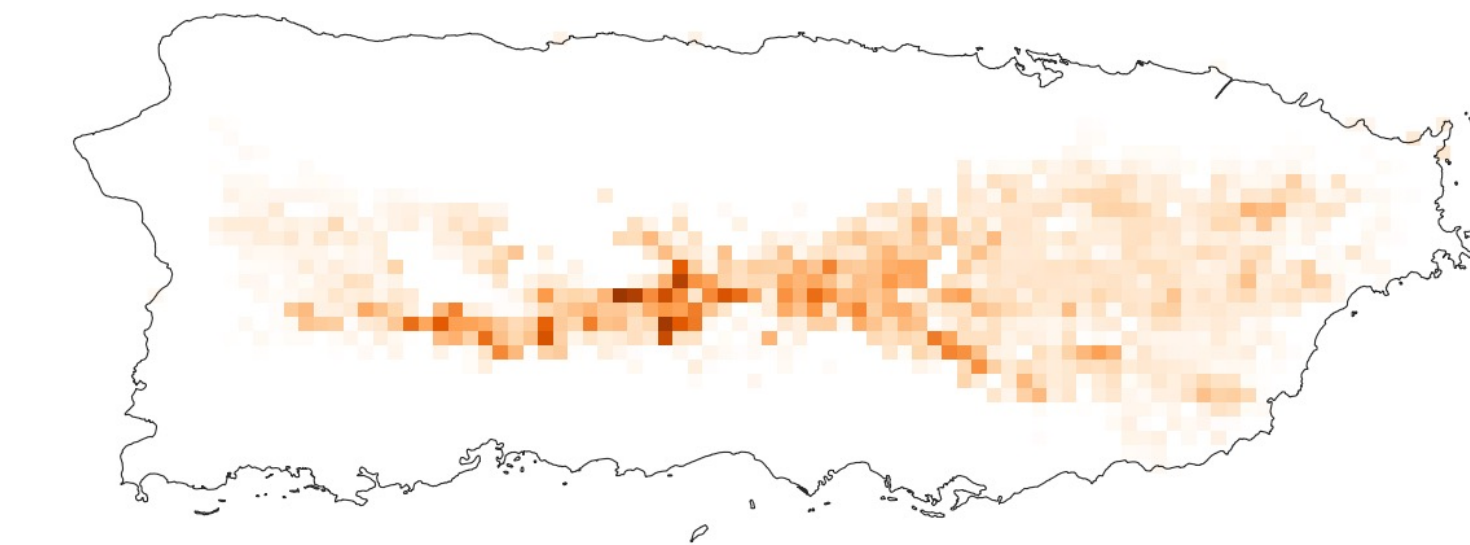

Habitat suitability

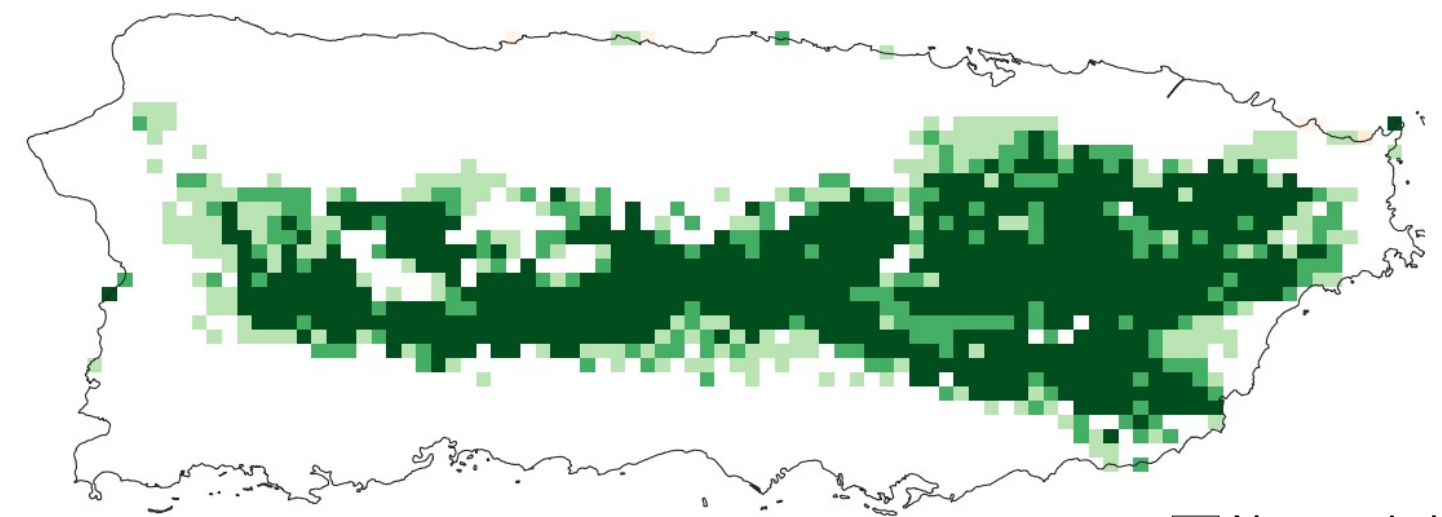

□ Never suitable  
□ Suitable in one era  
□ Suitable in two eras  
□ Always-suitable

Predicted habitat suitability

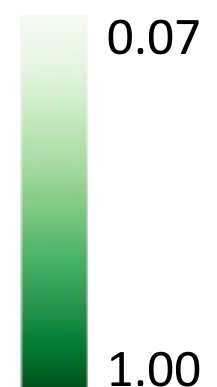

*E. unicolor*  
Dwarf coqui  
Coqui Duende

Historical

Historical records  
• Present

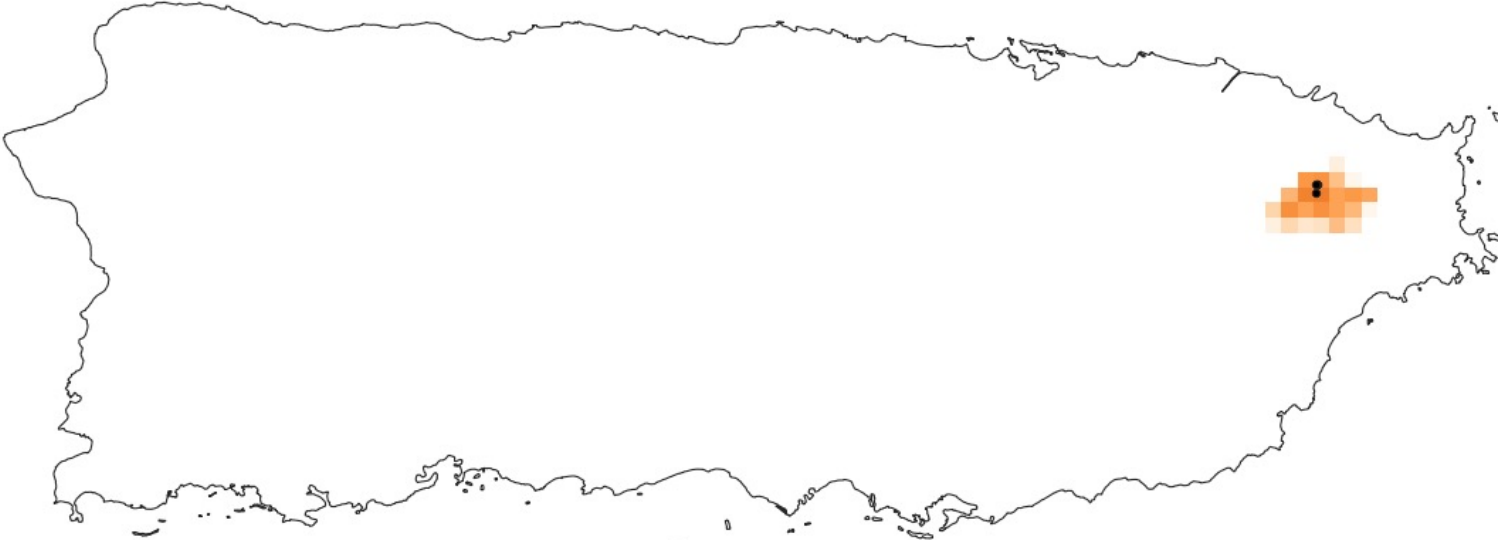

Current

Acoustic Sampling sites  
○ Absent  
● Present

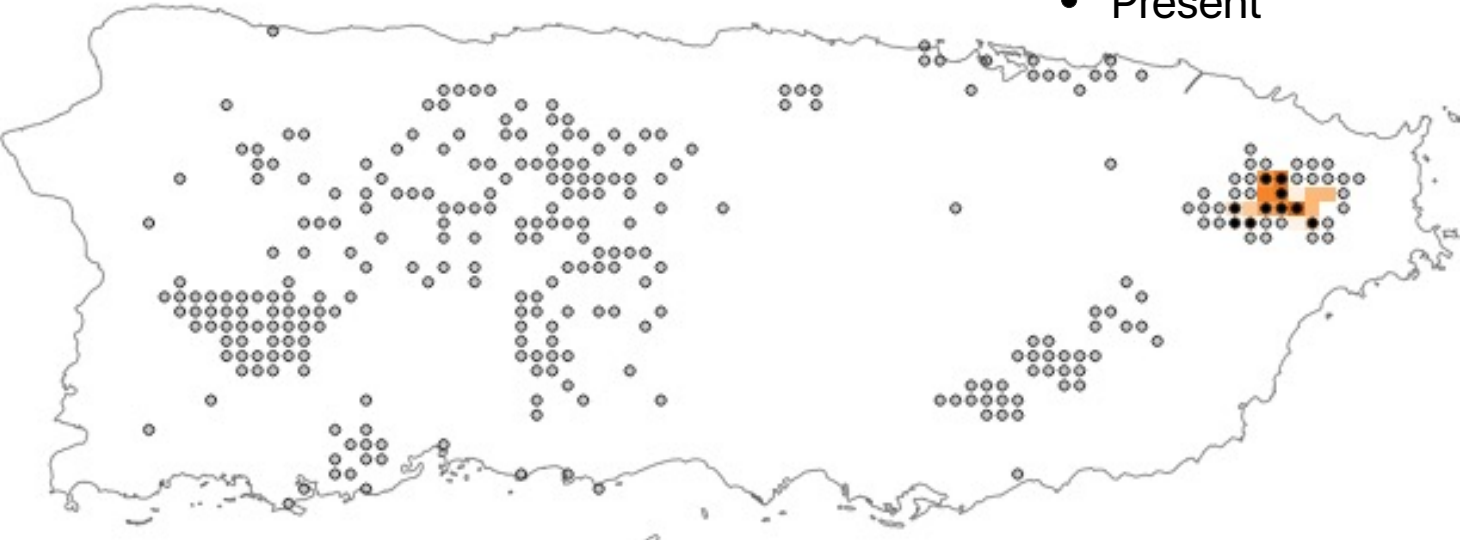

Future

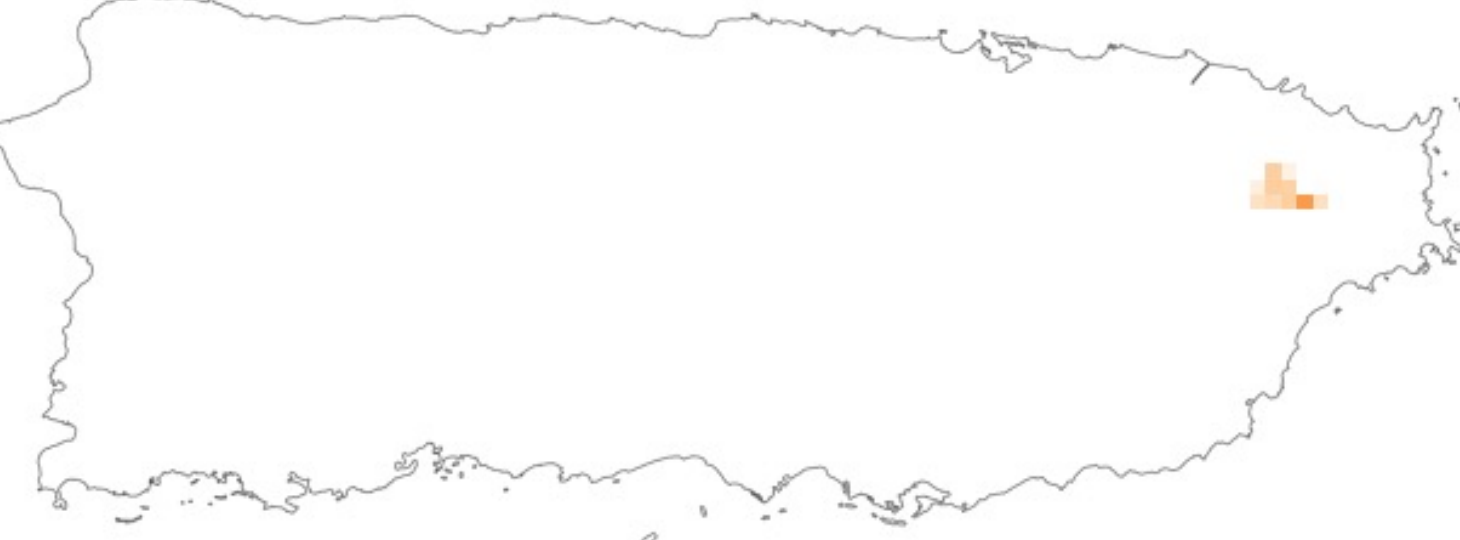

Predicted habitat suitability

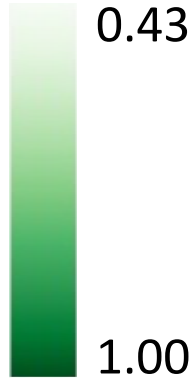

Habitat suitability

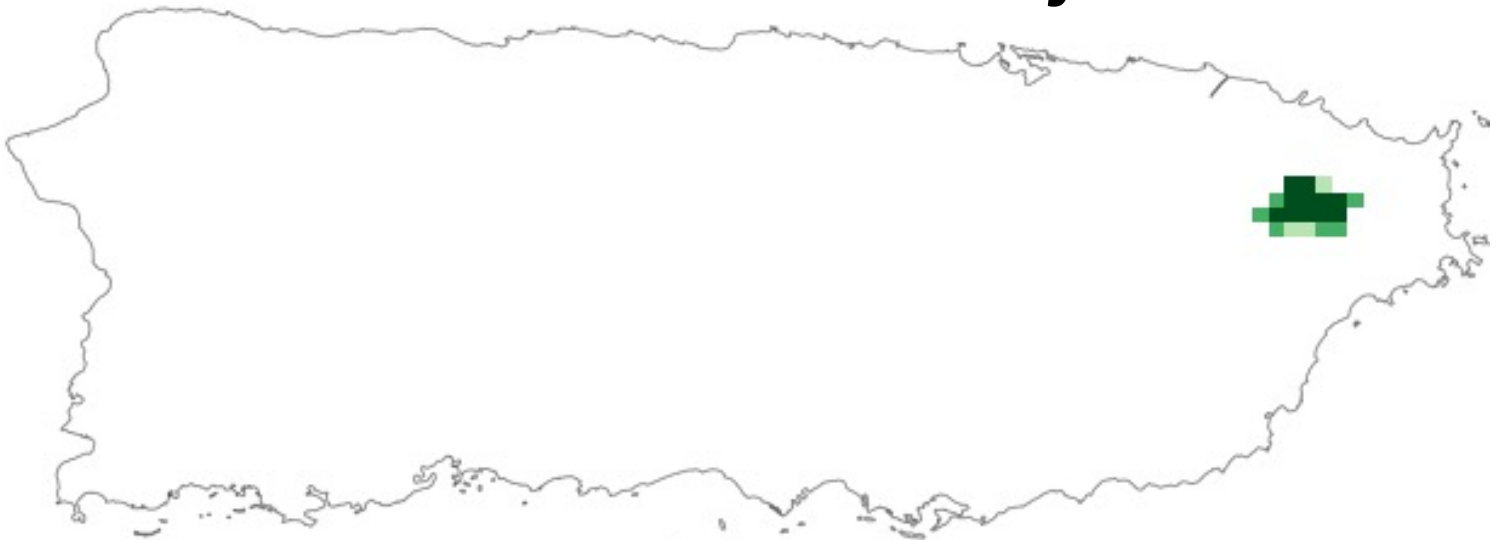

Legend for Habitat suitability:  
□ Never suitable  
□ Suitable in one era  
□ Suitable in two eras  
□ Always-suitable



*E. wightmanae*  
Melodious coqui  
Coqui melodioso

Historical

Historical records  
• Present

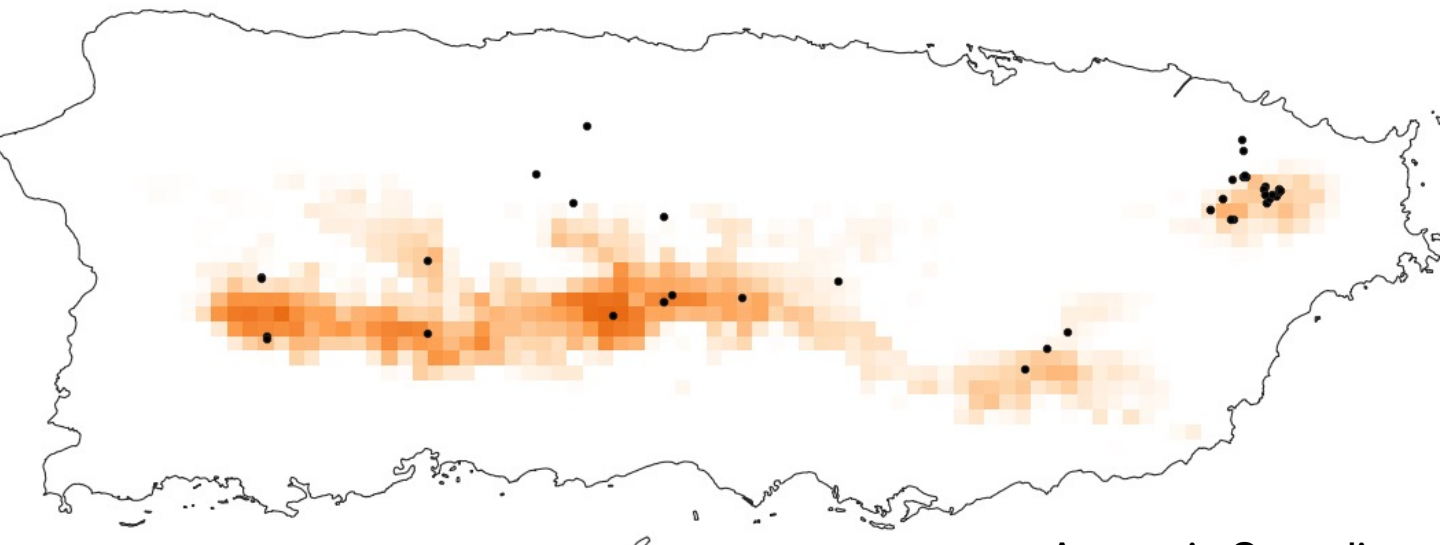

Current

Acoustic Sampling sites  
○ Absent  
• Present

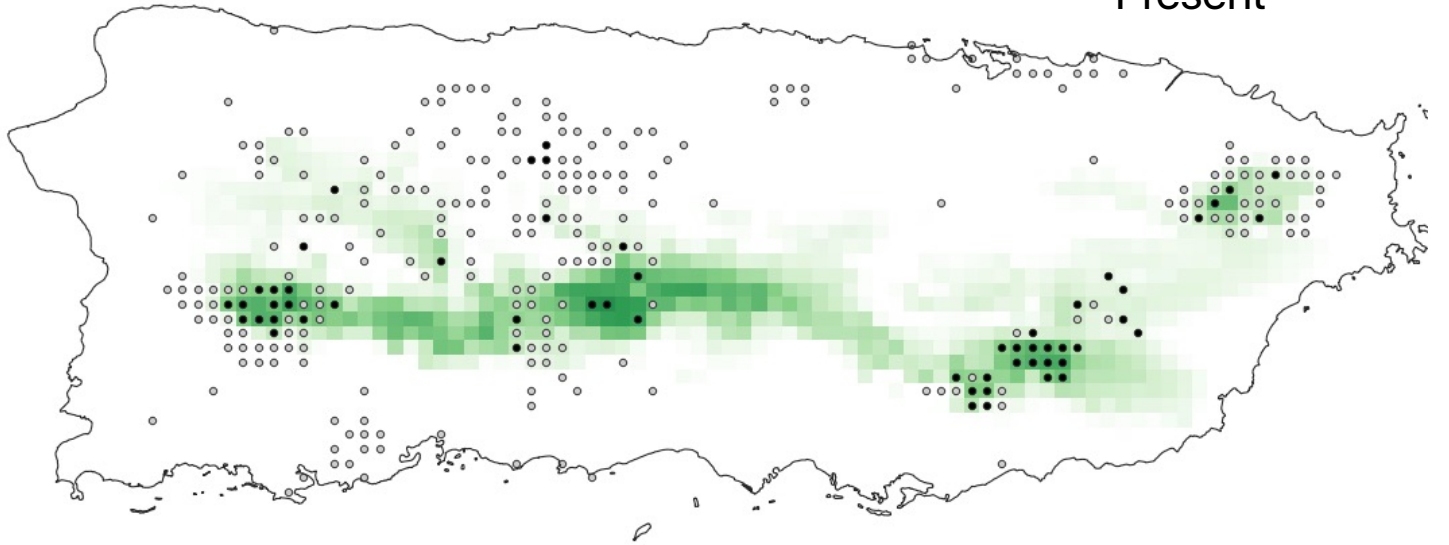

Future

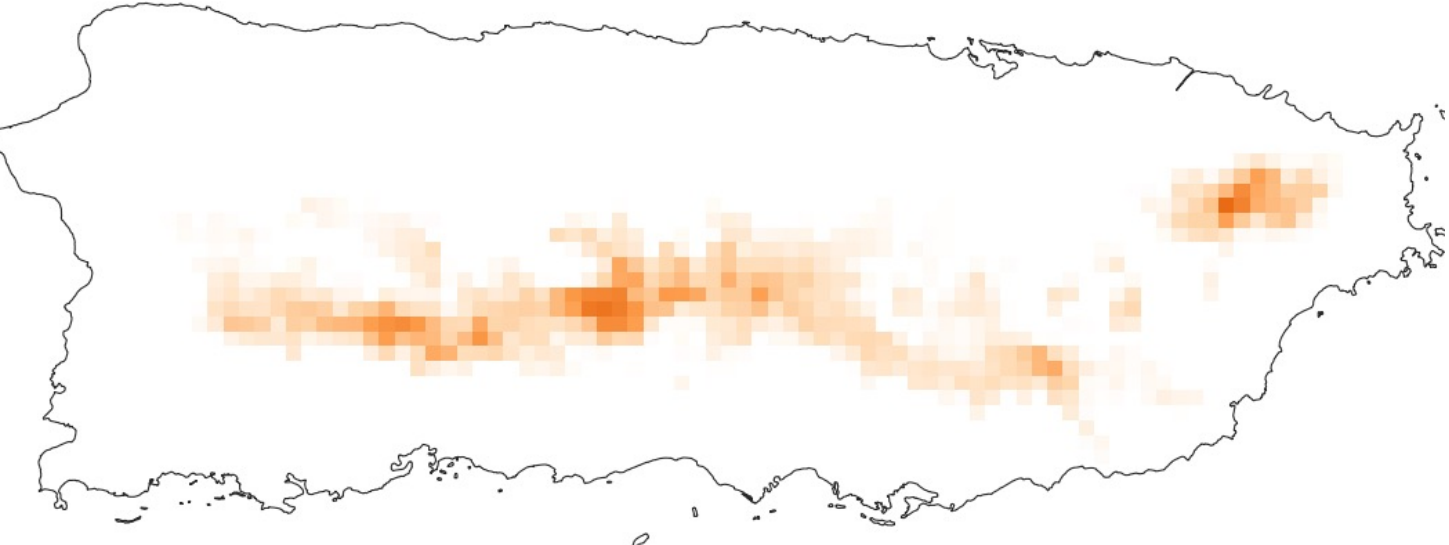

Habitat suitability

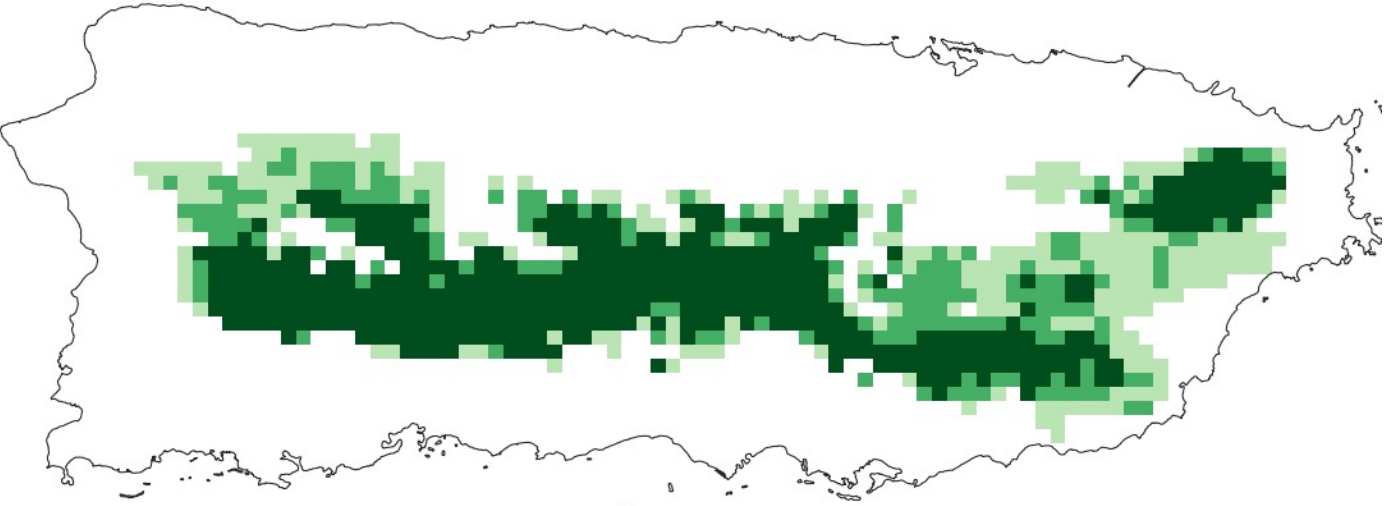

□ Never suitable  
□ Suitable in one era  
□ Suitable in two eras  
□ Always-suitable

Predicted habitat suitability

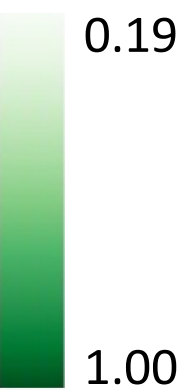

Supplement: MOESM2 [file 19397548]
